# Supplementary material for: Synthesis of aryl-fused 1,4-oxathiepines from pyridinium 1,4-zwitterionic thiolates and vinylideneortho-quinone methides
Source: Royal Society of Chemistry journal article supplement (doi:10.1039/d2qo00735e), 2022-01-01

## Synthesis of aryl-fused 1,4-oxathiepines from pyridinium

### 1,4-zwitterionic thiolates and vinylene *ortho*-quinone methides

Yixuan He,<sup>ab†</sup> Ping Wu,<sup>c†</sup> Xiang Zhang,<sup>d†</sup> Taimin Wang<sup>\*b</sup> Qingqing Tao,<sup>b</sup> Kang Zhou,<sup>b</sup> Zijun Ouyang,<sup>b</sup> Hongbin Zhai,<sup>be</sup> Dao-Juan Cheng,<sup>\*d</sup> and Bin Cheng,<sup>\*ab</sup>

<sup>a</sup> State Key Laboratory of Applied Organic Chemistry, College of Chemistry and Chemical Engineering, Lanzhou University, Lanzhou 730000, China

<sup>b</sup> Institute of Marine Biomedicine, Shenzhen Polytechnic, Shenzhen 518055, China; e-mail: chengbin@szpt.edu.cn, wangtm@szpt.edu.cn

<sup>c</sup> Key Laboratory of Coordination Chemistry and Functional Materials in Universities of Shandong, Dezhou College, Dezhou 253023, China

<sup>d</sup> School of Pharmacy, Anhui University of Chinese Medicine, Hefei 230012, China; chengdj614@ahucm.edu.cn

<sup>e</sup> State Key Laboratory of Chemical Oncogenomics, Shenzhen Engineering Laboratory of Nano Drug Slow-Release, Peking University Shenzhen Graduate School, Shenzhen 518055, China

<sup>†</sup> These authors contributed equally to this work

#### List of contents

|                                                                                               |            |
|-----------------------------------------------------------------------------------------------|------------|
| <b>1. General Information</b> .....                                                           | <b>S2</b>  |
| <b>2. Experimental Procedure</b> .....                                                        | <b>S2</b>  |
| <b>3. Table S1 Optimization of the Reaction Conditions for the Formation of 7a</b> .....      | <b>S7</b>  |
| <b>4. Table S2 Optimization of the Catalytic Asymmetric Version of (3 + 4) Reaction</b> ..... | <b>S8</b>  |
| <b>5. Investigation on the Racemization Barrier of 3a</b> .....                               | <b>S8</b>  |
| <b>6. HPLC Traces</b> .....                                                                   | <b>S10</b> |
| <b>7. References</b> .....                                                                    | <b>S10</b> |
| <b>8. Computation Details</b> .....                                                           | <b>S11</b> |
| <b>9. Figure S1 Steric selectivity of the addition of S-anion to allene moiety</b> .....      | <b>S62</b> |
| <b>10. Characterization Data</b> .....                                                        | <b>S63</b> |
| <b>11. NMR Spectra</b> .....                                                                  | <b>S77</b> |

## 1. General Information

All isolated compounds were characterized on JEOL 400 MHz spectrometer in  $(\text{CD}_3)_2\text{CO}$  and  $\text{CDCl}_3$ . Chemical shifts were reported as  $\delta$  values relative to internal chloroform ( $\delta$  7.26 for  $^1\text{H}$  NMR and 77.16 for  $^{13}\text{C}$  NMR) and  $(\text{CH}_3)_2\text{CO}$  ( $\delta$  2.05 for  $^1\text{H}$  NMR and  $\delta$  29.84 for  $^{13}\text{C}$  NMR).  $^{19}\text{F}$  NMR chemical shifts were determined as  $\delta$  values relative to external standard  $\text{PhCF}_3$  at  $-63.0$ . High-resolution mass spectra (HRMS) were recorded on a 4G mass spectrometer using electrospray ionization (ESI) analyzed by a quadrupole time-of-flight (QToF) instrument. All melting points were measured with the samples after column chromatography and uncorrected. Column chromatography was performed on silica gel. All solvents and reagents were used as obtained from commercial sources without further purification. High pressure liquid chromatography (HPLC) analyses were performed on a waters 1525 instrument equipped with an isostatic pump, using a chiral stationary phase column (Daicel Co. CHIRALPAK). The chiral HPLC methods were calibrated with the corresponding racemic mixtures.  $\alpha$ -Alkynyl naphthalen-2-ols are all known and prepared according to the literature.<sup>1</sup> (2-(Bromomethyl)phenoxy)(*tert*-butyl)dimethylsilane **6a** is known and prepared according to the literature.<sup>2</sup> 2-Alkynylphenols were prepared according to the literature.<sup>3,4,5</sup> **4a**, **4f**, **4g**, and **4h** are known.

## 2. Experimental Procedure

### (1) General procedure for the synthesis of naphthalene-fused 1,4-oxathiepienes **3a–3r**

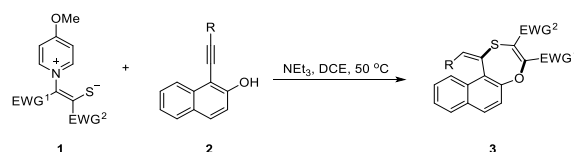

To a solution of  $\alpha$ -alkynyl naphthalen-2-ol **2** (0.1 mmol, 1.0 equiv) in DCE (2 mL) were added 1,4-zwitterionic thiolate (1.05 equiv) and  $\text{NEt}_3$  (1.05 equiv), and then the mixture was stirred at  $50^\circ\text{C}$ . After completion of the annulation reaction as monitored by TLC, the solvent was evaporated and the resulting residue was purified directly by silica gel column chromatography (eluent: 2% EtOAc in petroleum ether for **3g** and 10% for other products) to afford the corresponding naphthalene-fused 1,4-oxathiepienes **3a–3r**.

### (2) Scale-up experiment of **3a**

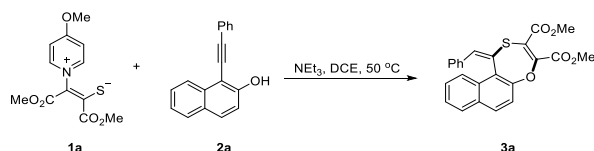

To a solution of 1-(phenylethynyl)naphthalen-2-ol (**2a**, 1.0 g, 4.1 mmol, 1.0 equiv) in DCE (40 mL) were added 1,4-zwitterionic thiolate **1a** (1.2 g, 4.3 mmol, 1.05 equiv) and  $\text{NEt}_3$  (0.60 mL, 4.3 mmol, 1.05 equiv), and then the mixture was stirred at  $50^\circ\text{C}$ . After completion of the annulation reaction as monitored by TLC, the solvent was evaporated and the resulting residue was purified directly by silica gel column chromatography (eluent: 10% EtOAc in petroleum ether) to afford **3a** (1.68 g, yield = 98%)

as a yellow oil.

### (3) Procedure for the synthesis of 2-alkynylphenol **4e**

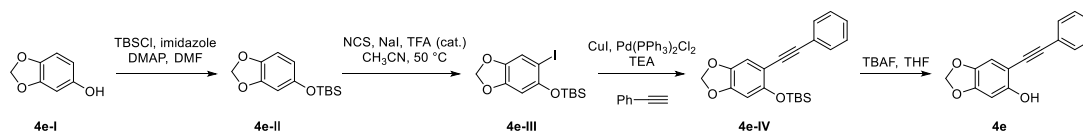

To a solution of sesamol (1.38 g, 10.0 mmol) in DMF (20 mL) was added imidazole (680 mg, 1.0 equiv), DMAP (12 mg, 0.01 equiv), and TBSCl (1.81 g, 1.2 equiv), and then the mixture was stirred for 1 h. After the consumption of sesamol monitored by TLC, the solution was quenched by icy water, extracted three times with petroleum ether. The combined organic layers were concentrated under reduced pressure to give crude TBS-protected sesamol.

To a solution of silane (**4e-II**) in CH<sub>3</sub>CN (20 mL) was added NaI (1.68 g, 1.12 equiv), NCS (1.55 g, 1.16 equiv) and TFA (cat.), and then the mixture was stirred at 50 °C in the dark. After the consumption of the silane monitored by TLC, the solution was quenched with aqueous sodium thiosulfate and extracted three times with ethyl acetate. Removal of the solvent gave an oil, which was purified by chromatography (eluent: petroleum ether) to give an iodinated silyl ether (**4e-III**).

To a solution of above-mentioned iodinated silyl ether in TEA (10 mL) was added ethynylbenzene (1.2 g, 1.2 equiv), CuI (95 mg, 0.05 equiv), and Pd(PPh<sub>3</sub>)<sub>2</sub>Cl<sub>2</sub> (70 mg, 0.01 equiv). The mixture was degassed and refilled with nitrogen, and then it was stirred at 50 °C overnight. After the coupling reaction was finished, removal of the solvent gave a residue, which was purified directly by silica gel column chromatography (eluent: petroleum ether) to give 2-alkynylphenol **4e-IV** (1.51 g, yield = 43% for 3 steps) as a brown solid.

To a solution of 2-alkynylphenol **4e-IV** (352 mg, 1 mmol) in THF (10 mL) was added TBAF 3H<sub>2</sub>O (473 mg, 1.5 equiv) at 0 °C directly and stirred for 30 mins. Then, the solution was quenched with icy water and extracted with ethyl acetate three times. Removal of the solvent gave a residue, which was purified by chromatography (eluent: 5% ethyl acetate in petroleum ether) to give 2-alkynylphenol **4e** as a white solid (233 mg, yield = 98%).

### (4) Procedure for the synthesis of 2-alkynylphenol **4i**

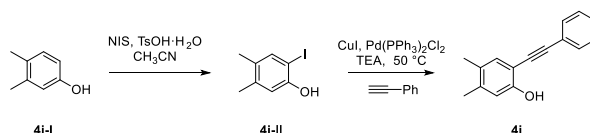

To a solution of 3,4-dimethylphenol (1.22 g, 10.0 mmol) and *p*-toluenesulfonic acid monohydrate (2.00 g, 1.05 equiv) in CH<sub>3</sub>CN (100 mL) was slowly added NIS (2.36 g, 1.05 equiv), and then the mixture was stirred for 0.5 h. After the consumption of 3,4-dimethylphenol monitored by TLC, the

solution was quenched by saturated sodium thiosulfate aqueous solution, extracted three times with ethyl acetate. The combined organic layers were concentrated under reduced pressure to give 2-iodo-4,5-dimethylphenol.

To a solution of 2-iodo-4,5-dimethylphenol obtained aforementioned in TEA (10 mL) was added ethynylbenzene (2.04 g, 2.0 equiv), CuI (95 mg, 0.05 equiv), and Pd(PPh<sub>3</sub>)<sub>2</sub>Cl<sub>2</sub> (70 mg, 0.01 equiv). The mixture was degassed and refilled with nitrogen, and then it was stirred at 50 °C overnight. After the coupling reaction was finished, removal of the solvent gave a residue, which was purified directly by silica gel column chromatography (eluent: 5% ethyl acetate in petroleum ether) to give 4,5-dimethyl-2-(phenylethynyl)phenol **4i** (1.62 g, yield = 73% for 2 steps) as a white solid.

**(5) Procedure for the synthesis of 2-alkynylphenols (4f, 4f-2, 4f-3, 4f-4, 4f-5, 4f-6, 4f-7, and 4f-8)**

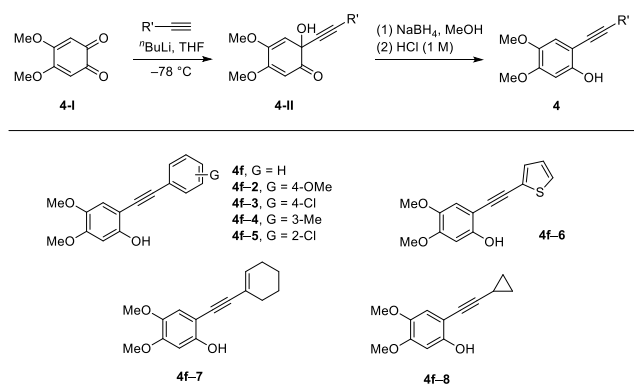

To a solution of ethynylbenzene (245 mg, 2.4 mmol) in THF (20 mL) at  $-78$  °C was added *n*-butyllithium (1.6 M in hexane, 1.44 mL) and then the solution was stirred for 20 min. To a solution of 4,5-dimethoxycyclohexa-3,5-diene-1,2-dione (336 mg, 2.0 mmol) in THF (130 mL) at  $-78$  °C was added the above-mentioned solution dropwise. The stirring was continued at  $-78$  °C for 1 h and the reaction was quenched with saturated aqueous ammonium chloride. The organic layer was removed in vacuum and the aqueous layer was extracted with dichloromethane. The organic layers were combined, dried, and concentrated. The residual oil was dissolved in methanol (50 mL) and sodium borohydride (151 mg, 4 mmol) was added slowly at 0 °C. After 1 h, HCl (1 M) was added to quench the reduction reaction and most of the methanol was removed under reduced pressure. The aqueous solution was extracted with dichloromethane and the organic layers were combined and dried with Na<sub>2</sub>SO<sub>4</sub>. Removal of the solvent gave an oil, which was purified by chromatography (eluent: 10% to 20% ethyl acetate in petroleum ether) to give **4f** (270 mg, yield = 53% for 2 steps) as a brown solid.

The other 2-alkynylphenols were prepared followed the same procedure with 4,5-dimethoxycyclohexa-3,5-diene-1,2-dione (336 mg, 2.0 mmol).



## (6) General procedure for the synthesis of benzene-fused 1,4-oxathiepins **5b–5l**

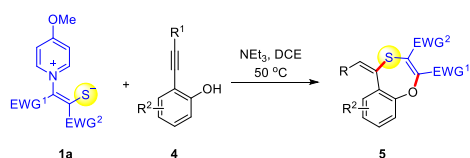

To a solution of 2-alkynylphenol **4** (0.2 mmol, 1.0 equiv) in DCE (2 mL) were added 1,4-zwitterionic thiolate (1.20 equiv) and NEt<sub>3</sub> (1.20 equiv), and then the mixture was stirred at 50 °C. After completion of the annulation reaction as monitored by TLC, the solvent was evaporated and the resulting residue was purified directly by silica gel column chromatography (eluent: 10% to 20% ethyl acetate in petroleum ether) to afford the corresponding 1,4-oxathiepins **5b–5l**.

## (7) Synthesis of **7a**

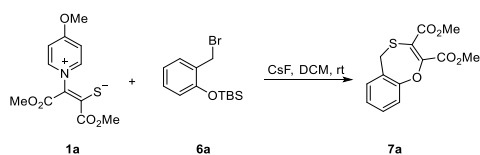

To a solution of (2-(bromomethyl)phenoxy)(*tert*-butyl)dimethylsilane (**6a**, 90 mg, 0.30 mmol, 1.0 equiv) in DCM (2 mL) was added 1,4-zwitterionic thiolate **1a** (102 mg, 0.360 mmol, 1.2 equiv) and CsF (68 mg, 0.45 mmol, 1.5 equiv), and then the mixture was stirred at room temperature. After completion of the annulation reaction as monitored by TLC, the solvent was evaporated and the resulting residue was purified directly by silica gel column chromatography (eluent: 10% EtOAc in petroleum ether) to afford **7a** (43 mg, yield = 51%) as a pale red oil.

## (8) Synthesis of **3a'**

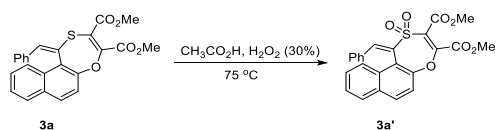

To a solution of naphthalene-fused 1,4-oxathiepins **3a** (84 mg, 0.20 mmol, 1.0 equiv) in CH<sub>3</sub>CO<sub>2</sub>H (2 mL) was added H<sub>2</sub>O<sub>2</sub> (30%, 91 mg, 0.80 mmol, 4 equiv), and then the mixture was stirred at 75 °C. After completion of the oxidation reaction as monitored by TLC, the reaction mixture was diluted with DCM and quenched with cold aqueous Na<sub>2</sub>CO<sub>3</sub> solution. To the mixture saturated aqueous sodium thiosulfate solution was added and then it was extracted with DCM. The combined organic layers were dried with Na<sub>2</sub>SO<sub>4</sub>, filtered, and evaporated, and the resulting residue was purified by silica gel column chromatography (eluent: 20–50% EtOAc in petroleum ether) to afford **3a'** (81 mg, yield = 90%) as a colorless oil.

### (9) Synthesis of 3c'

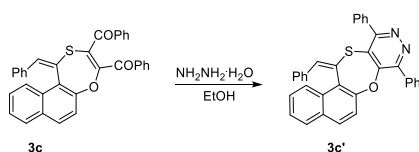

To a solution of naphthalene-fused 1,4-oxathiepins **3c** (102 mg, 0.200 mmol, 1.0 equiv) in EtOH (2 mL) was added  $\text{NH}_2\text{NH}_2 \cdot \text{H}_2\text{O}$  (80%, 31 mg, 0.50 mmol, 2.5 equiv), and then the mixture was stirred at reflux. After completion of the condensation reaction as monitored by TLC, the solvent was evaporated and the resulting residue was purified directly by silica gel column chromatography (eluent: 10% EtOAc in petroleum ether) to afford **3c'** (82 mg, yield = 81%) as a white solid.

### (10) General Procedure for the Organocatalytic Asymmetric (3 + 4) Reaction

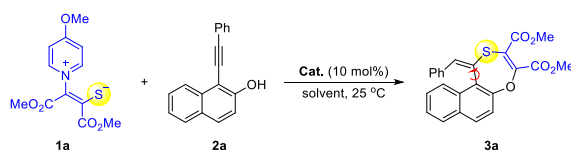

To a tube equipped with a magnetic stirring bar were added catalyst **Cat.** (0.005 mmol), pyridinium 1,4-zwitterionic thiolate **1a** (17.0 mg, 0.060 mmol, 1.2 equiv), 1-(phenylethynyl)naphthalen-2-ol **2a** (12.2 mg, 0.050 mmol) and solvent (0.5 mL) successively. The resulting mixture was stirred at 25 °C for 2-4 d, and directly charged onto silica gel. Products **3a** were isolated using petroleum ether/ethyl acetate (10:1) as eluent.

**3. Table S1** Optimization of the Reaction Conditions for the Formation of **7a**.<sup>a</sup>

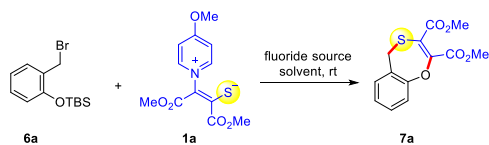

| Entry | <b>6a:1a</b> | Solvent           | Fluoride source | Isolated Yield (%) | NMR Yield (%) <sup>b</sup> |
|-------|--------------|-------------------|-----------------|--------------------|----------------------------|
| 1     | 1:1.2        | THF               | CsF/18-C-6      |                    | trace                      |
| 2     | 1:1.2        | DCM               | CsF/18-C-6      | 52%                |                            |
| 3     | 1:1.2        | DCM               | KF/18-C-6       | 27%                |                            |
| 4     | 1:1.2        | DCM               | KF              | 50%                |                            |
| 5     | 1:1.2        | DCM               | CsF             | 51%                | 55%                        |
| 6     | 1:1.2        | DCM               | TBAF            |                    | trace                      |
| 7     | 1:1.2        | MeCN              | KF              |                    | 26%                        |
| 8     | 1:1.2        | Acetone           | KF              |                    | 25%                        |
| 9     | 1:1.2        | DCE               | KF              |                    | 21%                        |
| 10    | 1:1.2        | MeCN              | CsF             |                    | 33%                        |
| 11    | 1:1.2        | Acetone           | CsF             |                    | 31%                        |
| 12    | 1:1.2        | DCE               | CsF             |                    | 30%                        |
| 13    | 1:1.2        | CHCl <sub>3</sub> | CsF             |                    | 49%                        |
| 14    | 1:1.5        | DCM               | CsF             |                    | 47%                        |
| 15    | 1.2:1        | DCM               | CsF             |                    | 42%                        |
| 16    | 1:1          | DCM               | CsF             |                    | 34%                        |

<sup>a</sup> Reaction conditions: **6a** (0.3 mmol), **1a**, and fluoride source in solvent (2 mL) in air.

<sup>b</sup> The yield was determined by <sup>1</sup>H-NMR spectra using 1,3,5-trimethoxybenzene as the internal standard.

**4. Table S2** Optimization of the Catalytic Asymmetric Version of (3 + 4) Reaction between **1a** and **2a** with Bifunctional Organocatalysts.<sup>a</sup>

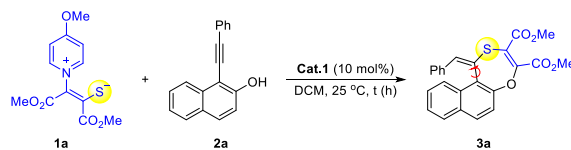

| Entry | Solvent                         | Time (h)  | Yield (%) | ee (%)    |
|-------|---------------------------------|-----------|-----------|-----------|
| 1     | DCE                             | 48        | 86        | 56        |
| 2     | <b>DCM</b>                      | <b>48</b> | <b>82</b> | <b>67</b> |
| 3     | CH <sub>3</sub> CN              | 72        | 71        | 39        |
| 4     | 1,4-dioxane                     | 48        | 38        | 40        |
| 5     | CHCl <sub>3</sub>               | 48        | 81        | 63        |
| 6     | acetone                         | 48        | 48        | 41        |
| 7     | CH <sub>3</sub> OH              | 72        | 34        | 13        |
| 8     | PhCF <sub>3</sub>               | 48        | 32        | 15        |
| 9     | CH <sub>2</sub> Br <sub>2</sub> | 72        | 37        | 35        |
| 10    | MTBE                            | 48        | trace     | -         |
| 11    | toluene                         | 48        | trace     | -         |
| 12    | MTBE:DCM=1:1                    | 96        | 33        | 55        |

<sup>a</sup> All reactions were carried out with pyridinium 1,4-zwitterionic thiolate **1a** (17.0 mg, 0.060 mmol), 1-(phenylethynyl)naphthalen-2-ol **2a** (12.2 mg, 0.050 mmol), catalyst **Cat.1** (10 mol%) and solvent (0.5 mL) at 25 °C in a sealed tube for 2-4 d. Yields refer to isolated pure compound. The ee values were determined by chiral stationary phase HPLC analysis [Daicel Chiralpak OD-H, isopropanol/hexane (22:78), 1.0 mL/min,  $\lambda = 254$  nm].

**5. Investigation on the Racemization Barrier of 3a**

The reaction was conducted at 1 mg/mL concentration in a sealed tube and heated at the specified temperature. The change in enantiomeric excess over time was determined by HPLC. The barrier to rotation for **3a** was obtained by kinetic of racemization of an enantiomer.

This data was plotted as  $(\ln[ee_0/ee_t])$  versus time (seconds). The gradient of this graph gives the racemization constant ( $k_{\text{racemization}} = 2 \times k_{\text{enantiomerization}}$ ) at the specified temperature. The barrier to rotation,  $\Delta G^{\ddagger}_{\text{enantiomerization}}$ , was calculated using the following Eyring equation,  $R =$  Gas constant =  $8.3145 \text{ J K}^{-1} \text{ mol}^{-1}$ ,  $h =$  Planck constant =  $6.62608 \times 10^{-34} \text{ J s}$ ,  $k_B =$  Boltzmann constant =  $1.38066 \times 10^{-23} \text{ J K}^{-1}$ , and  $T_1 =$  temperature racemization study was conducted at, in Kelvin.

$$\Delta G^\ddagger_{\text{enantiomerization}} = RT_1 \ln \frac{k_B T_1}{h k_{\text{enantiomerization}}}$$

Racemization of **3a** in *i*-PrOH at 60 °C

**Table S3 Investigation on the racemization barrier of 3a**

| Time (seconds) | Enantiomeric Excess (ee) | First Order Racemization (ln[ee <sub>0</sub> /ee <sub>t</sub> ]) |
|----------------|--------------------------|------------------------------------------------------------------|
| 0              | 58.7                     | 0.00000                                                          |
| 1800           | 53.8                     | 0.08717                                                          |
| 5400           | 46.3                     | 0.23730                                                          |
| 9000           | 39.5                     | 0.39614                                                          |
| 12600          | 35.1                     | 0.51424                                                          |
| 16200          | 30.7                     | 0.64818                                                          |
| 19800          | 25.7                     | 0.82595                                                          |

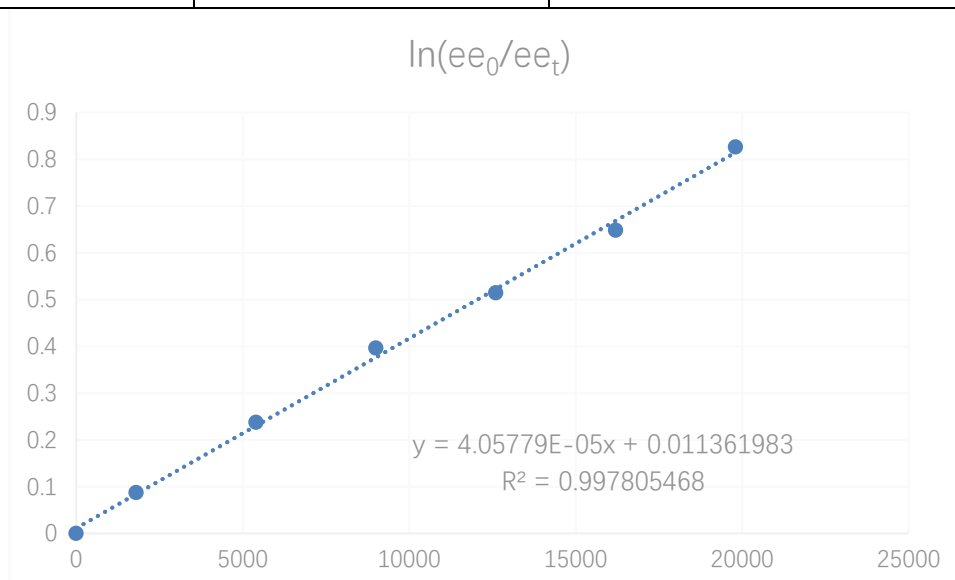

$$k_{\text{racemization}} (60 \text{ }^\circ\text{C}) = 4.0578 \times 10^{-5} \text{ s}^{-1}$$

$$k_{\text{enantiomerization}} (60 \text{ }^\circ\text{C}) = 2.0289 \times 10^{-5} \text{ s}^{-1}$$

$$\Delta G^\ddagger_{\text{enantiomerization}} = RT_1 \ln \frac{k_B T_1}{h k_{\text{enantiomerization}}} = 112.73 \text{ KJ/mol} = 26.9 \text{ kcal/mol}$$

## 6. HPLC Traces

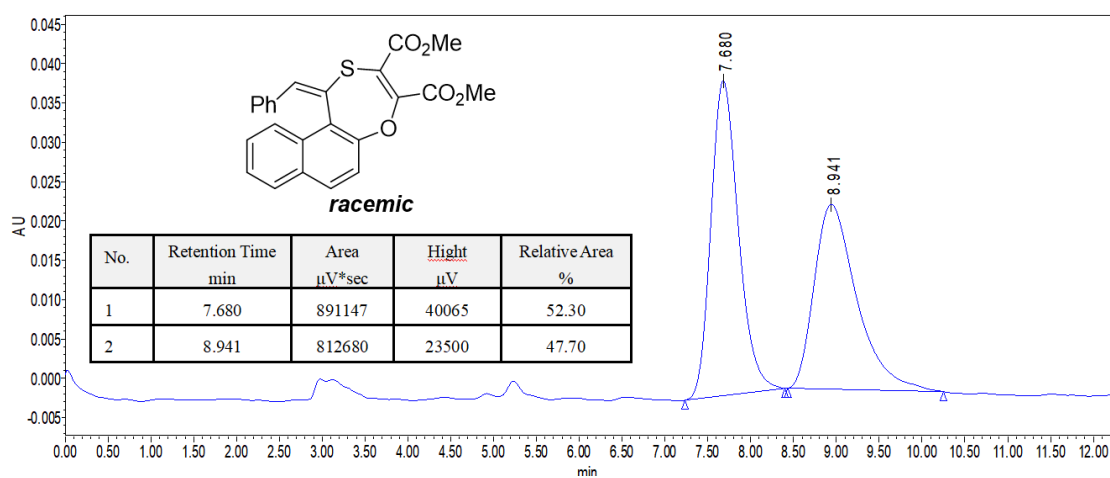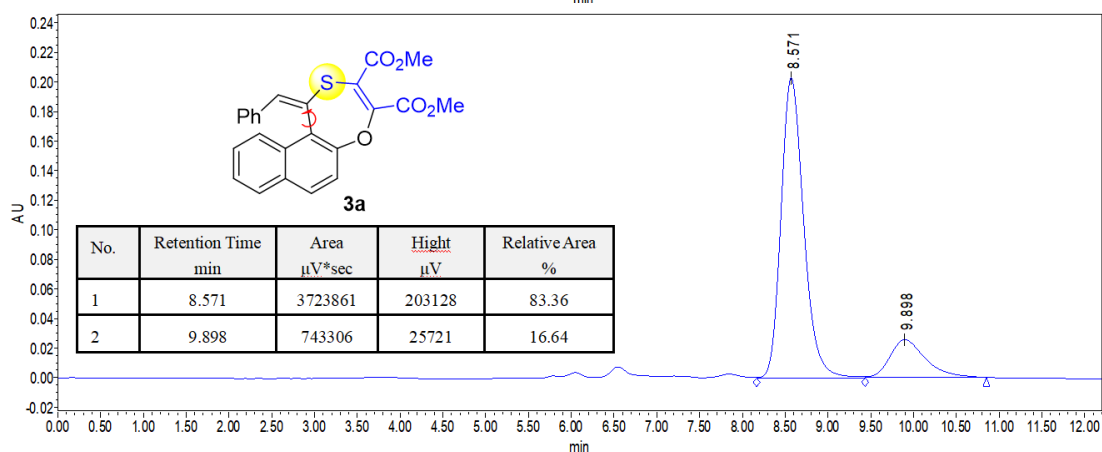

## 7. References

1. T. Xu, K. Chen, H.-Y. Zhu, W.-J. Hao, S.-J. Tu and B. Jiang, *Org. Lett.*, 2020, **22**, 2414.
2. J. Izquierdo, A. Orue and K. A. Scheidt, *J. Am. Chem. Soc.*, 2013, **135**, 10634.
3. S. Taschinski, R. Döpp, M. Ackermann, F. Rominger, F. de Vries, M. F. S. J. Menger, M. Rudolph, A. S. K. Hashmi, J. E. M. N. Klein, *Angew. Chem. Int. Ed.* **2019**, *58*, 16988.
4. P. Magnus, W. A. Freund, E. J. Moorhead, and T. Rainey. *J. Am. Chem. Soc.* **2012**, *134*, 6140.
5. H. W. Moore, K. F. West, U. Wriede, K. Chow, M. Fernandez, and N. V. Nguyen. *J. Org. Chem.* **1987**, *52*, 2537.
6. M. G. Auzias, M. Neuburger, H. A. Wegner, *Synlett* **2010**, *16*, 2443.

## 8. Computation Details

All the calculations were carried out using Gaussian 16 software package<sup>1</sup>. In present work, M06-2X density functional combined with 6-311G(d,p) basis set were employed for geometry optimizations and vibrational frequency calculations. Given the solvent effect, the self-consistent reaction field (SCRF) method and SMD model<sup>2</sup> in dichloroethane solvent were used in geometry optimization and vibrational frequencies calculations. vibrational frequencies calculations were performed at 50 °C and 1 atm to characterize stationary point (no imaginary frequency) and transition state (only one imaginary frequency). Intrinsic reaction coordinate (IRC)<sup>3</sup> calculations were performed to verify transition-state structures connected to their corresponding stationary points.

### References

1. Frisch, M. J.; Trucks, G. W.; Schlegel, H. B.; Scuseria, G. E.; Robb, M. A.; Cheeseman, J. R.; Scalmani, G.; Barone, V.; Petersson, G. A.; Nakatsuji, H.; Li, X.; Caricato, M.; Marenich, A. V.; Bloino, J.; Janesko, B. G.; Gomperts, R.; Mennucci, B.; Hratchian, H. P.; Ortiz, J. V.; Izmaylov, A. F.; Sonnenberg, J. L.; Williams-Young, D.; Ding, F.; Lipparini, F.; Egidi, F.; Goings, J.; Peng, B.; Petrone, A.; Henderson, T.; Ranasinghe, D.; Zakrzewski, V. G.; Gao, J.; Rega, N.; Zheng, G.; Liang, W.; Hada, M.; Ehara, M.; Toyota, K.; Fukuda, R.; Hasegawa, J.; Ishida, M.; Nakajima, T.; Honda, Y.; Kitao, O.; Nakai, H.; Vreven, T.; Throssell, K.; Montgomery Jr., J. A.; Peralta, J. E.; Ogliaro, F.; Bearpark, M. J.; Heyd, J. J.; Brothers, E. N.; Kudin, K. N.; Staroverov, V. N.; Keith, T. A.; Kobayashi, R.; Normand, J.; Raghavachari, K.; Rendell, A. P.; Burant, J. C.; Iyengar, S. S.; Tomasi, J.; Cossi, M.; Millam, J. M.; Klene, M.; Adamo, C.; Cammi, R.; Ochterski, J. W.; Martin, R. L.; Morokuma, K.; Farkas, O.; Foresman, J. B.; Fox, D. J. Gaussian16, Gaussian, Inc., Wallingford, CT, **2016**.
2. Marenich, A. V.; Cramer, C. J.; Truhlar, D. G. Universal solvation model based on solute electron density and on a continuum model of the solvent defined by the bulk dielectric constant and atomic surface tensions, *J. Phys. Chem. B* **2009**, 113 6378.
3. Gonzalez, C.; Schlegel, H. B. An improved algorithm for reaction path following, *J. Chem. Phys.* **1989**, 90, 2154.

**Table S4** The Gibbs free energies (G) and relative Gibbs free energies ( $\Delta G$  relative to reactants) for **2a** (1-(phenylethynyl)naphthalen-2-ol), **4a** (2-phenylethynyl-phenol) with **1a**

| substrates                      | <b>2a</b>    |                       | <b>4a</b>    |                       |
|---------------------------------|--------------|-----------------------|--------------|-----------------------|
| Species                         | G (a.u.)     | $\Delta G$ (kcal/mol) | G (a.u.)     | $\Delta G$ (kcal/mol) |
| Reactant <b>2</b>               | -768.028789  |                       | -614.449954  |                       |
| Reactant <b>1a</b>              | -1293.854956 |                       | -1293.854956 |                       |
| Et <sub>3</sub> N               | -292.176323  |                       | -292.176323  |                       |
| Et <sub>3</sub> NH <sup>+</sup> | -292.627925  |                       | -292.627925  |                       |
| Complex                         | -1060.204423 | 0.4                   | -906.627408  | -0.7                  |
| <b>IM1</b>                      | -767.554647  | 14.1                  | -613.970632  | 17.4                  |
| <b>TS1</b>                      | -1060.16472  | 25.3                  | -906.574514  | 32.5                  |
| <b>IM2</b>                      | -768.012891  | 10.0                  | -614.421062  | 18.1                  |
| <b>TS2</b>                      | -2061.838485 | 28.4                  | -1908.241132 | 40.0                  |
| <b>IM3</b>                      | -2061.855951 | 17.4                  | -1908.275224 | 18.6                  |
| <b>TS3</b>                      | -2061.844985 | 24.3                  | -1908.265549 | 24.7                  |
| <b>IM4</b>                      | -2061.864525 | 12.1                  | -1908.287532 | 10.9                  |
| <b>TS4</b>                      | -2061.852039 | 19.9                  | -1908.27553  | 18.4                  |
| Product                         | -1699.214584 | -1.4                  | -1545.636783 | -2.1                  |
| 4-methoxypyridine               | -362.67144   |                       | -362.67144   |                       |

\*values given in solvent dichloroethane at 50 °C and 1 atm

**Table S5** The Gibbs free energies (G for substrates **4b–4h** and **IM2**) and relative Gibbs free energies ( $\Delta G$ ) of **IM2** relative to corresponding substrate.

| Species   | G (a.u.) for substrate | G (a.u.) for <b>IM2</b> | $\Delta G$ (kcal/mol) |
|-----------|------------------------|-------------------------|-----------------------|
| <b>4b</b> | -728.932524            | -728.903918             | 18.0                  |
| <b>4c</b> | -818.937223            | -818.907958             | 18.4                  |
| <b>4d</b> | -422.784012            | -422.752759             | 19.6                  |
| <b>4e</b> | -802.955803            | -802.939357             | 10.3                  |
| <b>4f</b> | -843.408806            | -843.38965              | 12.0                  |
| <b>4g</b> | -843.417305            | -843.397439             | 12.5                  |
| <b>4h</b> | -728.933294            | -728.905973             | 17.1                  |
| <b>4i</b> | -693.014802            | -692.988250             | 16.7                  |

\*values given in solvent dichloroethane at 50 °C and 1 atm

#### Cartesian coordinates for reaction of substrate 2-phenylethynyl-phenol

##### Reactant **4a** (2-phenylethynyl-phenol)

|   |          |           |           |
|---|----------|-----------|-----------|
| C | 3.974928 | 0.913145  | 0.000011  |
| C | 2.581681 | 0.920602  | 0.000005  |
| C | 1.87437  | -0.296186 | -0.000005 |
| C | 2.587833 | -1.503624 | -0.000002 |
| C | 3.972677 | -1.505472 | -0.000009 |
| C | 4.661977 | -0.29169  | -0.000008 |



|   |           |           |           |
|---|-----------|-----------|-----------|
| H | 4.497411  | 1.862184  | 0.000042  |
| H | 2.031885  | -2.433569 | 0.000001  |
| H | 4.514172  | -2.443029 | -0.000019 |
| H | 5.745724  | -0.284121 | -0.000001 |
| O | 1.955784  | 2.117027  | -0.000069 |
| H | 0.996841  | 1.984664  | 0.00044   |
| C | 0.446879  | -0.266798 | -0.000003 |
| C | -0.759663 | -0.191299 | 0.000031  |
| C | -2.189166 | -0.123235 | 0.000029  |
| C | -2.949455 | -1.300783 | 0.000012  |
| C | -2.837926 | 1.119263  | 0.00001   |
| C | -4.335937 | -1.231087 | -0.000014 |
| H | -2.445285 | -2.259719 | 0.000019  |
| C | -4.225013 | 1.17782   | -0.000009 |
| H | -2.248778 | 2.02874   | 0.00002   |
| C | -4.976609 | 0.005472  | -0.00002  |
| H | -4.918185 | -2.14494  | -0.000031 |
| H | -4.720457 | 2.141464  | -0.000025 |
| H | -6.059068 | 0.055339  | -0.00004  |

|                                               |                             |
|-----------------------------------------------|-----------------------------|
| Zero-point correction =                       | 0.197001 (Hartree/Particle) |
| Thermal correction to Energy =                | 0.211129                    |
| Thermal correction to Enthalpy =              | 0.212153                    |
| Thermal correction to Gibbs Free Energy =     | 0.151807                    |
| Sum of electronic and zero-point Energies =   | -614.404760                 |
| Sum of electronic and thermal Energies =      | -614.390632                 |
| Sum of electronic and thermal Enthalpies =    | -614.389608                 |
| Sum of electronic and thermal Free Energies = | -614.449954                 |
| SCF Done: E(RM062X) =                         | -614.601761089 A.U.         |

#### Complex for substrate 2-phenylethynyl-phenol

|   |           |           |           |
|---|-----------|-----------|-----------|
| C | 0.777211  | 1.397237  | -0.033547 |
| C | -0.480461 | 2.035132  | -0.126129 |
| C | -0.544686 | 3.428728  | -0.258008 |
| C | 0.609463  | 4.196035  | -0.297164 |
| C | 1.849033  | 3.56426   | -0.203933 |
| C | 1.935557  | 2.18502   | -0.072748 |
| H | 2.759929  | 4.151546  | -0.231952 |
| H | 2.903979  | 1.702573  | 0.000988  |
| O | 0.808082  | 0.071088  | 0.093906  |
| C | -1.672573 | 1.250459  | -0.086186 |
| C | -2.690286 | 0.599998  | -0.052302 |
| C | -3.885865 | -0.185392 | -0.009476 |

|   |           |           |           |
|---|-----------|-----------|-----------|
| C | -5.141614 | 0.422906  | -0.145033 |
| C | -3.809873 | -1.574203 | 0.168703  |
| C | -6.296558 | -0.346818 | -0.102595 |
| H | -5.199952 | 1.496027  | -0.283164 |
| C | -4.970253 | -2.335413 | 0.210027  |
| H | -2.838295 | -2.04247  | 0.273877  |
| C | -6.215195 | -1.725737 | 0.074598  |
| H | -7.26318  | 0.131561  | -0.208543 |
| H | -4.902618 | -3.408098 | 0.348693  |
| H | -7.118656 | -2.323242 | 0.10702   |
| H | -1.519808 | 3.896823  | -0.328625 |
| H | 0.545786  | 5.272075  | -0.399392 |
| H | 1.76727   | -0.299496 | 0.111826  |
| N | 3.157283  | -1.103136 | 0.104567  |
| C | 4.064747  | -0.606363 | 1.155056  |
| C | 2.720981  | -2.483352 | 0.394926  |
| C | 3.736064  | -0.945216 | -1.243095 |
| H | 4.549364  | 0.294031  | 0.767934  |
| H | 4.858405  | -1.339574 | 1.352512  |
| C | 3.335734  | -0.266409 | 2.449125  |
| H | 2.206417  | -2.460341 | 1.357506  |
| H | 3.594793  | -3.139443 | 0.51147   |
| C | 1.774189  | -3.048499 | -0.655062 |
| H | 2.945737  | -1.141922 | -1.971064 |
| H | 4.002055  | 0.109736  | -1.348423 |
| C | 4.952456  | -1.816646 | -1.543523 |
| H | 2.900719  | -1.148412 | 2.921919  |
| H | 4.038798  | 0.175122  | 3.158684  |
| H | 2.536178  | 0.456431  | 2.26783   |
| H | 2.279498  | -3.243582 | -1.603017 |
| H | 1.364142  | -3.994602 | -0.296402 |
| H | 0.942383  | -2.36414  | -0.838675 |
| H | 5.319255  | -1.593805 | -2.547828 |
| H | 5.767135  | -1.627358 | -0.840627 |
| H | 4.706611  | -2.880567 | -1.507571 |

|                                               |                             |
|-----------------------------------------------|-----------------------------|
| Zero-point correction =                       | 0.405294 (Hartree/Particle) |
| Thermal correction to Energy =                | 0.431592                    |
| Thermal correction to Enthalpy =              | 0.432615                    |
| Thermal correction to Gibbs Free Energy =     | 0.341626                    |
| Sum of electronic and zero-point Energies =   | -906.563741                 |
| Sum of electronic and thermal Energies =      | -906.537443                 |
| Sum of electronic and thermal Enthalpies =    | -906.536420                 |
| Sum of electronic and thermal Free Energies = | -906.627408                 |

E(UM062X) = -906.969034799 A.U.

**IM1 for substrate 2-phenylethynyl-phenol**

|   |           |           |           |
|---|-----------|-----------|-----------|
| C | 2.366248  | 1.048489  | 0.162548  |
| C | 1.643925  | -0.133254 | -0.432624 |
| C | 2.314719  | -1.428623 | -0.518662 |
| C | 3.573458  | -1.573369 | -0.071402 |
| C | 4.285286  | -0.445024 | 0.504303  |
| C | 3.733571  | 0.778803  | 0.617969  |
| H | 5.300026  | -0.607793 | 0.852104  |
| H | 4.272384  | 1.614682  | 1.048828  |
| O | 1.848452  | 2.146315  | 0.25697   |
| C | 0.406255  | 0.032593  | -0.864945 |
| C | -0.80921  | 0.209577  | -1.294388 |
| C | -2.039585 | 0.041042  | -0.494293 |
| C | -1.997918 | -0.28857  | 0.865151  |
| C | -3.27722  | 0.21762   | -1.116817 |
| C | -3.175395 | -0.439973 | 1.5829    |
| H | -1.04008  | -0.42101  | 1.357264  |
| C | -4.456217 | 0.064942  | -0.394166 |
| H | -3.311805 | 0.475508  | -2.169793 |
| C | -4.408674 | -0.264459 | 0.955931  |
| H | -3.133326 | -0.693653 | 2.635724  |
| H | -5.410927 | 0.204366  | -0.887711 |
| H | -5.326364 | -0.382739 | 1.519989  |
| H | -0.933133 | 0.507347  | -2.335316 |
| H | 1.764462  | -2.255354 | -0.952319 |
| H | 4.075688  | -2.530632 | -0.133553 |

Zero-point correction = 0.183500 (Hartree/Particle)

Thermal correction to Energy = 0.197299

Thermal correction to Enthalpy = 0.198322

Thermal correction to Gibbs Free Energy = 0.138830

Sum of electronic and zero-point Energies = -613.925963

Sum of electronic and thermal Energies = -613.912164

Sum of electronic and thermal Enthalpies = -613.911141

Sum of electronic and thermal Free Energies = -613.970632

SCF Done: E(RM062X) = -614.109462779 A.U.

**TS1 for substrate 2-phenylethynyl-phenol**

|   |          |           |          |
|---|----------|-----------|----------|
| C | 2.664451 | -0.78684  | 1.039765 |
| C | 1.998051 | -1.031918 | -0.2566  |

|   |           |           |           |
|---|-----------|-----------|-----------|
| C | 2.768925  | -1.35396  | -1.430974 |
| C | 4.115205  | -1.499611 | -1.362115 |
| C | 4.778766  | -1.325807 | -0.099386 |
| C | 4.107859  | -0.996492 | 1.033076  |
| H | 5.85536   | -1.459328 | -0.059136 |
| H | 4.622696  | -0.858229 | 1.977412  |
| O | 2.058425  | -0.399179 | 2.04283   |
| C | 0.651798  | -0.897809 | -0.323655 |
| C | -0.581858 | -0.599438 | -0.366853 |
| C | -1.827457 | -1.373391 | -0.289873 |
| C | -1.819185 | -2.772069 | -0.20417  |
| C | -3.054687 | -0.703081 | -0.298967 |
| C | -3.012328 | -3.477409 | -0.130678 |
| H | -0.870604 | -3.297935 | -0.195062 |
| C | -4.249241 | -1.411921 | -0.222575 |
| H | -3.067154 | 0.379907  | -0.367781 |
| C | -4.231125 | -2.800183 | -0.138715 |
| H | -2.993627 | -4.559192 | -0.064703 |
| H | -5.193031 | -0.879162 | -0.229932 |
| H | -5.160668 | -3.354235 | -0.080134 |
| H | -0.700907 | 0.692972  | -0.289914 |
| N | -0.71542  | 2.089426  | 0.020527  |
| H | 2.237323  | -1.487649 | -2.367159 |
| H | 4.694247  | -1.751064 | -2.241634 |
| C | -1.464764 | 2.292051  | 1.279636  |
| H | -2.528016 | 2.274142  | 1.026917  |
| H | -1.236502 | 3.289315  | 1.674129  |
| C | 0.729671  | 2.342314  | 0.209136  |
| H | 1.095614  | 1.567831  | 0.890242  |
| H | 0.867036  | 3.308961  | 0.709182  |
| C | -1.323076 | 2.819587  | -1.108755 |
| H | -0.820408 | 2.495708  | -2.021763 |
| H | -2.359819 | 2.480903  | -1.178085 |
| C | 1.532285  | 2.29664   | -1.084943 |
| H | 1.367784  | 3.181295  | -1.703449 |
| H | 2.595351  | 2.250464  | -0.838445 |
| H | 1.289373  | 1.41128   | -1.676481 |
| C | -1.275522 | 4.338626  | -0.986248 |
| H | -1.721046 | 4.786291  | -1.877044 |
| H | -1.836882 | 4.691065  | -0.118666 |
| H | -0.249062 | 4.703784  | -0.905205 |
| C | -1.174989 | 1.237407  | 2.340904  |
| H | -0.115867 | 1.177968  | 2.595525  |
| H | -1.726783 | 1.495695  | 3.247233  |

|                                               |          |          |                             |
|-----------------------------------------------|----------|----------|-----------------------------|
| H                                             | -1.50055 | 0.246481 | 2.019562                    |
| Zero-point correction =                       |          |          | 0.401213 (Hartree/Particle) |
| Thermal correction to Energy =                |          |          | 0.426683                    |
| Thermal correction to Enthalpy =              |          |          | 0.427706                    |
| Thermal correction to Gibbs Free Energy =     |          |          | 0.342978                    |
| Sum of electronic and zero-point Energies =   |          |          | -906.516279                 |
| Sum of electronic and thermal Energies =      |          |          | -906.490810                 |
| Sum of electronic and thermal Enthalpies =    |          |          | -906.489786                 |
| Sum of electronic and thermal Free Energies = |          |          | -906.574514                 |
| SCF Done: E(RM062X) =                         |          |          | -906.917492221 A.U.         |

**IM2 for substrate 2-phenylethynyl-phenol**

|   |           |           |           |
|---|-----------|-----------|-----------|
| C | 2.588526  | 1.034817  | 0.000032  |
| C | 1.882514  | -0.239549 | -0.000005 |
| C | 2.571313  | -1.463577 | 0.000005  |
| C | 3.954212  | -1.522442 | 0.000095  |
| C | 4.671173  | -0.310156 | 0.000069  |
| C | 4.028045  | 0.906828  | 0.000002  |
| H | 5.757617  | -0.335318 | 0.000081  |
| H | 4.594134  | 1.833619  | -0.000017 |
| O | 2.005463  | 2.143388  | -0.000138 |
| C | 0.462258  | -0.218132 | -0.000094 |
| C | -0.750548 | -0.191787 | -0.000131 |
| C | -2.177246 | -0.12438  | -0.000046 |
| C | -2.956911 | -1.291825 | -0.000041 |
| C | -2.823722 | 1.122501  | 0.000009  |
| C | -4.343323 | -1.209861 | 0.000017  |
| H | -2.464353 | -2.257144 | -0.000089 |
| C | -4.210067 | 1.194511  | 0.000068  |
| H | -2.223389 | 2.024699  | 0         |
| C | -4.976343 | 0.030874  | 0.000075  |
| H | -4.932575 | -2.119791 | 0.000018  |
| H | -4.694761 | 2.164165  | 0.000109  |
| H | -6.058379 | 0.090732  | 0.000121  |
| H | 1.98862   | -2.380372 | 0.000044  |
| H | 4.470093  | -2.474629 | 0.000129  |

|                                             |  |  |                             |
|---------------------------------------------|--|--|-----------------------------|
| Zero-point correction =                     |  |  | 0.195911 (Hartree/Particle) |
| Thermal correction to Energy =              |  |  | 0.209990                    |
| Thermal correction to Enthalpy =            |  |  | 0.211013                    |
| Thermal correction to Gibbs Free Energy =   |  |  | 0.150210                    |
| Sum of electronic and zero-point Energies = |  |  | -614.375362                 |

|                                               |                     |
|-----------------------------------------------|---------------------|
| Sum of electronic and thermal Energies =      | -614.361282         |
| Sum of electronic and thermal Enthalpies =    | -614.360259         |
| Sum of electronic and thermal Free Energies = | -614.421062         |
| SCF Done: E(RM062X) =                         | -614.571272293 A.U. |

**TS2 for substrate 2-phenylethynyl-phenol**

|   |           |           |           |
|---|-----------|-----------|-----------|
| C | 1.470516  | -0.233665 | -1.267785 |
| C | 2.824416  | -0.326966 | -1.422535 |
| C | 3.661617  | -0.060519 | -0.32543  |
| C | 3.081229  | 0.292855  | 0.901376  |
| C | 1.712079  | 0.366913  | 0.984251  |
| N | 0.928347  | 0.112733  | -0.078184 |
| H | 0.769095  | -0.424756 | -2.068371 |
| H | 3.252535  | -0.602426 | -2.376457 |
| H | 3.669156  | 0.507262  | 1.781548  |
| H | 1.198005  | 0.628019  | 1.899937  |
| O | 4.96194   | -0.165575 | -0.536066 |
| C | 5.856506  | 0.097231  | 0.551786  |
| H | 6.854388  | -0.048598 | 0.147925  |
| H | 5.741375  | 1.125953  | 0.898936  |
| H | 5.678676  | -0.604882 | 1.368569  |
| C | -0.507411 | 0.200011  | 0.05066   |
| C | -1.209289 | -0.962484 | 0.219683  |
| C | -0.99456  | 1.576579  | -0.011117 |
| O | -0.270979 | 2.540001  | -0.140748 |
| O | -2.324911 | 1.667015  | 0.097107  |
| C | -2.709437 | -0.882751 | 0.370384  |
| O | -3.280485 | -0.879552 | 1.426264  |
| O | -3.309281 | -0.892842 | -0.816894 |
| C | -2.86317  | 2.993106  | 0.059968  |
| H | -2.452771 | 3.593019  | 0.872585  |
| H | -2.638376 | 3.468001  | -0.895551 |
| H | -3.937163 | 2.877858  | 0.181856  |
| C | -4.7388   | -0.813221 | -0.775225 |
| H | -5.153926 | -1.678016 | -0.256496 |
| H | -5.048627 | 0.101355  | -0.267707 |
| H | -5.064497 | -0.801259 | -1.812112 |
| S | -0.567422 | -2.535349 | 0.301201  |

|                                           |                             |
|-------------------------------------------|-----------------------------|
| Zero-point correction =                   | 0.442975 (Hartree/Particle) |
| Thermal correction to Energy =            | 0.474648                    |
| Thermal correction to Enthalpy =          | 0.475592                    |
| Thermal correction to Gibbs Free Energy = | 0.377590                    |

|                                               |                     |
|-----------------------------------------------|---------------------|
| Sum of electronic and zero-point Energies =   | -1908.175746        |
| Sum of electronic and thermal Energies =      | -1908.144073        |
| Sum of electronic and thermal Enthalpies =    | -1908.143129        |
| Sum of electronic and thermal Free Energies = | -1908.241132        |
| SCF Done: E(RM062X) =                         | -1908.61872113 A.U. |

**IM3 for substrate 2-phenylethynyl-phenol**

|   |           |           |           |
|---|-----------|-----------|-----------|
| C | 1.5583    | 2.613398  | 1.095102  |
| C | 1.591431  | 2.176814  | -0.282929 |
| C | 2.592002  | 2.619418  | -1.162089 |
| C | 3.598696  | 3.476045  | -0.754646 |
| C | 3.597082  | 3.915446  | 0.581818  |
| C | 2.622186  | 3.510112  | 1.465485  |
| H | 4.375955  | 4.59123   | 0.92326   |
| H | 2.625626  | 3.856406  | 2.494381  |
| O | 0.691824  | 2.224804  | 1.931449  |
| C | 0.581643  | 1.247359  | -0.805019 |
| C | 0.772227  | 0.109712  | -1.498242 |
| C | 2.003785  | -0.686763 | -1.617715 |
| C | 2.023055  | -1.707512 | -2.579377 |
| C | 3.106152  | -0.568352 | -0.755258 |
| C | 3.101432  | -2.577076 | -2.684996 |
| H | 1.170688  | -1.822078 | -3.24153  |
| C | 4.176976  | -1.447459 | -0.854186 |
| H | 3.116484  | 0.200859  | 0.006951  |
| C | 4.183154  | -2.453846 | -1.817632 |
| H | 3.09291   | -3.356368 | -3.438486 |
| H | 5.011667  | -1.348876 | -0.168865 |
| H | 5.022775  | -3.13519  | -1.890294 |
| H | -0.087688 | -0.330818 | -1.999288 |
| C | -0.477169 | -2.358934 | 0.213833  |
| C | 0.701763  | -2.881061 | 0.648618  |
| C | 1.510442  | -2.130422 | 1.526912  |
| C | 1.054854  | -0.879675 | 1.960597  |
| C | -0.156527 | -0.419472 | 1.508185  |
| N | -0.902519 | -1.136397 | 0.643031  |
| H | -1.114031 | -2.870201 | -0.494897 |
| H | 1.041209  | -3.843015 | 0.28952   |
| H | 1.618982  | -0.233255 | 2.617202  |
| H | -0.51207  | 0.562984  | 1.792306  |
| O | 2.664116  | -2.669199 | 1.868132  |
| C | 3.558227  | -1.900816 | 2.6833    |
| H | 4.453519  | -2.50797  | 2.784239  |

|   |           |           |           |
|---|-----------|-----------|-----------|
| H | 3.798654  | -0.954571 | 2.193998  |
| H | 3.115624  | -1.720658 | 3.664859  |
| C | -2.127523 | -0.592073 | 0.14308   |
| C | -2.235097 | 0.662058  | -0.350762 |
| C | -3.281765 | -1.522442 | 0.315197  |
| O | -3.277804 | -2.426583 | 1.109755  |
| O | -4.278246 | -1.257459 | -0.521308 |
| C | -3.626547 | 1.219827  | -0.609706 |
| O | -3.997874 | 1.611213  | -1.678445 |
| O | -4.318388 | 1.278704  | 0.51934   |
| C | -5.492936 | -1.992443 | -0.299834 |
| H | -5.303867 | -3.062024 | -0.385618 |
| H | -5.889829 | -1.762318 | 0.68974   |
| H | -6.178521 | -1.663336 | -1.07563  |
| C | -5.67726  | 1.725251  | 0.378348  |
| H | -6.212289 | 1.068239  | -0.30864  |
| H | -6.106933 | 1.672434  | 1.374564  |
| H | -5.699436 | 2.748877  | 0.004657  |
| S | -1.085207 | 1.921982  | -0.700856 |
| H | 4.357498  | 3.811804  | -1.450451 |
| H | 2.563491  | 2.266519  | -2.189387 |

|                                              |                             |
|----------------------------------------------|-----------------------------|
| Zero-point correction=                       | 0.444774 (Hartree/Particle) |
| Thermal correction to Energy=                | 0.480932                    |
| Thermal correction to Enthalpy=              | 0.481956                    |
| Thermal correction to Gibbs Free Energy=     | 0.372837                    |
| Sum of electronic and zero-point Energies=   | -1908.203287                |
| Sum of electronic and thermal Energies=      | -1908.167128                |
| Sum of electronic and thermal Enthalpies=    | -1908.166105                |
| Sum of electronic and thermal Free Energies= | -1908.275224                |
| SCF Done: E(RM062X) =                        | -1908.64806044 A.U.         |

### TS3 for substrate 2-phenylethynyl-phenol

|   |           |           |           |
|---|-----------|-----------|-----------|
| C | -0.879149 | -1.042757 | 1.164682  |
| C | -1.626281 | -1.000646 | -0.038471 |
| C | -2.654607 | -1.913453 | -0.270287 |
| C | -2.970911 | -2.885209 | 0.672235  |
| C | -2.244681 | -2.939399 | 1.864228  |
| C | -1.211555 | -2.04616  | 2.101144  |
| H | -2.484183 | -3.691592 | 2.608537  |
| H | -0.634585 | -2.085794 | 3.018662  |
| O | 0.069932  | -0.173648 | 1.396123  |
| C | -1.348637 | 0.070631  | -1.035408 |



|   |           |           |           |
|---|-----------|-----------|-----------|
| C | -2.079597 | 1.174058  | -1.240825 |
| C | -3.302335 | 1.577816  | -0.521115 |
| C | -3.508735 | 1.322262  | 0.841361  |
| C | -4.286392 | 2.287043  | -1.222746 |
| C | -4.678033 | 1.737093  | 1.468191  |
| H | -2.741469 | 0.817766  | 1.415248  |
| C | -5.457418 | 2.695967  | -0.595833 |
| H | -4.128919 | 2.509194  | -2.273243 |
| C | -5.660166 | 2.417703  | 0.752969  |
| H | -4.818609 | 1.533609  | 2.523682  |
| H | -6.210162 | 3.23504   | -1.159721 |
| H | -6.570948 | 2.737559  | 1.245773  |
| H | -1.780036 | 1.840972  | -2.04687  |
| C | 2.662527  | 1.260872  | -1.12818  |
| C | 3.12721   | 2.535298  | -1.262421 |
| C | 2.913649  | 3.460788  | -0.226219 |
| C | 2.249309  | 3.029118  | 0.929825  |
| C | 1.80464   | 1.732194  | 1.002849  |
| N | 1.97955   | 0.868055  | -0.020272 |
| H | 2.826602  | 0.502108  | -1.878275 |
| H | 3.665458  | 2.828774  | -2.153151 |
| H | 2.072461  | 3.679133  | 1.774013  |
| H | 1.282556  | 1.346003  | 1.862818  |
| O | 3.376336  | 4.681225  | -0.418081 |
| C | 3.189154  | 5.659154  | 0.613489  |
| H | 3.632089  | 6.573392  | 0.228979  |
| H | 2.125185  | 5.810592  | 0.804037  |
| H | 3.702225  | 5.350664  | 1.526183  |
| C | 1.584828  | -0.53591  | 0.069383  |
| C | 1.076004  | -1.163514 | -1.034883 |
| C | 2.366553  | -1.253607 | 1.14563   |
| O | 3.409724  | -0.82667  | 1.571368  |
| O | 1.763653  | -2.346368 | 1.564711  |
| C | 1.355249  | -2.589452 | -1.288362 |
| O | 2.364976  | -3.158162 | -0.934907 |
| O | 0.404956  | -3.190592 | -2.010891 |
| C | 2.50843   | -3.157778 | 2.476371  |
| H | 2.719359  | -2.606206 | 3.393171  |
| H | 1.875495  | -4.016051 | 2.686814  |
| H | 3.442511  | -3.478262 | 2.013115  |
| C | 0.659201  | -4.558207 | -2.340175 |
| H | 0.728527  | -5.161514 | -1.434159 |
| H | -0.188113 | -4.878193 | -2.941609 |
| H | 1.585454  | -4.6503   | -2.908952 |

|   |           |           |           |
|---|-----------|-----------|-----------|
| S | 0.0239    | -0.247815 | -2.136203 |
| H | -3.212724 | -1.849784 | -1.199128 |
| H | -3.773577 | -3.588165 | 0.48403   |

|                                               |                             |
|-----------------------------------------------|-----------------------------|
| Zero-point correction =                       | 0.444840 (Hartree/Particle) |
| Thermal correction to Energy =                | 0.480196                    |
| Thermal correction to Enthalpy =              | 0.481220                    |
| Thermal correction to Gibbs Free Energy =     | 0.372243                    |
| Sum of electronic and zero-point Energies =   | -1908.192952                |
| Sum of electronic and thermal Energies =      | -1908.157596                |
| Sum of electronic and thermal Enthalpies =    | -1908.156572                |
| Sum of electronic and thermal Free Energies = | -1908.265549                |
| SCF Done: E(RM062X) =                         | -1908.63779192 A.U.         |

#### IM4 for substrate 2-phenylethynyl-phenol

|   |           |           |           |
|---|-----------|-----------|-----------|
| C | 0.79603   | -1.150243 | -1.01192  |
| C | 1.70753   | -0.877178 | 0.012085  |
| C | 2.854531  | -1.667613 | 0.111614  |
| C | 3.104304  | -2.677852 | -0.808935 |
| C | 2.202044  | -2.912239 | -1.84298  |
| C | 1.041784  | -2.152089 | -1.941677 |
| H | 2.393898  | -3.694093 | -2.568312 |
| H | 0.314039  | -2.321701 | -2.724056 |
| O | -0.327313 | -0.356262 | -1.176127 |
| C | 1.464027  | 0.215073  | 0.981449  |
| C | 2.260515  | 1.276666  | 1.174611  |
| C | 3.49042   | 1.634767  | 0.443587  |
| C | 4.493591  | 2.334204  | 1.128093  |
| C | 3.688423  | 1.354156  | -0.916308 |
| C | 5.670203  | 2.709498  | 0.489833  |
| H | 4.345722  | 2.576819  | 2.175437  |
| C | 4.862443  | 1.734588  | -1.554623 |
| H | 2.913282  | 0.849862  | -1.481052 |
| C | 5.862091  | 2.406859  | -0.854807 |
| H | 6.435768  | 3.241836  | 1.042792  |
| H | 4.994166  | 1.511536  | -2.607359 |
| H | 6.776666  | 2.700532  | -1.356675 |
| H | 1.99426   | 1.959932  | 1.979446  |
| C | -2.967394 | 0.986203  | 0.836498  |
| C | -3.595466 | 2.188463  | 0.994812  |
| C | -3.259372 | 3.260888  | 0.152635  |
| C | -2.286652 | 3.057712  | -0.83409  |
| C | -1.700379 | 1.818453  | -0.946456 |

|   |           |           |           |
|---|-----------|-----------|-----------|
| N | -2.031575 | 0.807084  | -0.125486 |
| H | -3.163861 | 0.129729  | 1.463328  |
| H | -4.337695 | 2.319404  | 1.770176  |
| H | -1.975026 | 3.837977  | -1.512414 |
| H | -0.94721  | 1.610148  | -1.689574 |
| O | -3.894597 | 4.401409  | 0.361145  |
| C | -3.572296 | 5.526743  | -0.464591 |
| H | -4.209518 | 6.334398  | -0.115461 |
| H | -2.522856 | 5.80064   | -0.341178 |
| H | -3.790215 | 5.30665   | -1.511443 |
| C | -1.397631 | -0.570036 | -0.248881 |
| C | -0.985899 | -1.076722 | 1.077717  |
| C | -2.496213 | -1.447621 | -0.909376 |
| O | -3.629066 | -1.457163 | -0.509823 |
| O | -2.056935 | -2.097899 | -1.969732 |
| C | -0.984074 | -2.48691  | 1.268244  |
| O | -1.530361 | -3.308048 | 0.532347  |
| O | -0.332024 | -2.900143 | 2.38698   |
| C | -2.957269 | -3.089361 | -2.47944  |
| H | -3.189383 | -3.802369 | -1.687982 |
| H | -3.872585 | -2.622928 | -2.844182 |
| H | -2.428585 | -3.578385 | -3.293625 |
| C | -0.317358 | -4.307621 | 2.594458  |
| H | 0.175176  | -4.821317 | 1.766545  |
| H | 0.243778  | -4.465226 | 3.513934  |
| H | -1.329193 | -4.701974 | 2.704711  |
| S | 0.0086    | 0.008685  | 2.018385  |
| H | 3.555094  | -1.470388 | 0.915341  |
| H | 4.002467  | -3.277516 | -0.721765 |

|                                               |                             |
|-----------------------------------------------|-----------------------------|
| Zero-point correction =                       | 0.446326 (Hartree/Particle) |
| Thermal correction to Energy =                | 0.481623                    |
| Thermal correction to Enthalpy =              | 0.482646                    |
| Thermal correction to Gibbs Free Energy =     | 0.374578                    |
| Sum of electronic and zero-point Energies =   | -1908.215784                |
| Sum of electronic and thermal Energies =      | -1908.180487                |
| Sum of electronic and thermal Enthalpies =    | -1908.179464                |
| Sum of electronic and thermal Free Energies = | -1908.287532                |
| SCF Done: E(RM062X) =                         | -1908.66211014 A.U.         |

**TS4 for substrate 2-phenylethynyl-phenol (4a)**

|   |          |           |           |
|---|----------|-----------|-----------|
| C | 1.10537  | -0.668952 | -1.265763 |
| C | 2.063315 | -0.671516 | -0.253898 |

|   |           |           |           |
|---|-----------|-----------|-----------|
| C | 3.259107  | -1.359121 | -0.478641 |
| C | 3.499031  | -1.981045 | -1.696626 |
| C | 2.546465  | -1.921629 | -2.711698 |
| C | 1.33744   | -1.271887 | -2.492948 |
| H | 2.737191  | -2.394393 | -3.667723 |
| H | 0.569041  | -1.228306 | -3.256273 |
| O | -0.10244  | -0.009049 | -1.052085 |
| C | 1.843288  | 0.089643  | 0.993758  |
| C | 2.695062  | 1.005866  | 1.480342  |
| C | 3.934921  | 1.507509  | 0.857248  |
| C | 5.017911  | 1.831706  | 1.683898  |
| C | 4.058644  | 1.730028  | -0.52138  |
| C | 6.202643  | 2.325753  | 1.149262  |
| H | 4.926892  | 1.685666  | 2.75526   |
| C | 5.240685  | 2.229162  | -1.053642 |
| H | 3.219666  | 1.525511  | -1.176565 |
| C | 6.320636  | 2.521754  | -0.223249 |
| H | 7.032063  | 2.561363  | 1.806244  |
| H | 5.316235  | 2.398998  | -2.121647 |
| H | 7.241321  | 2.910444  | -0.642476 |
| H | 2.464419  | 1.444194  | 2.44971   |
| C | -3.054028 | 0.872705  | 0.846398  |
| C | -3.97853  | 1.876863  | 1.040473  |
| C | -4.142923 | 2.838279  | 0.035855  |
| C | -3.365404 | 2.74088   | -1.122773 |
| C | -2.466762 | 1.689655  | -1.219224 |
| N | -2.317124 | 0.784736  | -0.257861 |
| H | -2.883624 | 0.107406  | 1.598895  |
| H | -4.57019  | 1.93367   | 1.944626  |
| H | -3.444033 | 3.451304  | -1.933532 |
| H | -1.841917 | 1.568545  | -2.096946 |
| O | -5.047802 | 3.795772  | 0.265808  |
| C | -5.23853  | 4.792681  | -0.736117 |
| H | -6.003562 | 5.45957   | -0.346561 |
| H | -4.315762 | 5.352159  | -0.907465 |
| H | -5.583862 | 4.342874  | -1.670104 |
| C | -1.004449 | -0.781759 | -0.322655 |
| C | -0.70012  | -1.177222 | 0.954299  |
| C | -1.814098 | -1.690852 | -1.254383 |
| O | -2.828069 | -1.401378 | -1.822671 |
| O | -1.134827 | -2.817099 | -1.450476 |
| C | -1.499822 | -2.244452 | 1.553064  |
| O | -2.481689 | -2.738173 | 1.033134  |
| O | -1.063107 | -2.623317 | 2.760998  |

|   |           |           |           |
|---|-----------|-----------|-----------|
| C | -1.757577 | -3.762806 | -2.328391 |
| H | -2.724572 | -4.062729 | -1.922854 |
| H | -1.891188 | -3.330869 | -3.320789 |
| H | -1.082131 | -4.613126 | -2.370485 |
| C | -1.831299 | -3.646937 | 3.400109  |
| H | -1.817656 | -4.561846 | 2.806994  |
| H | -1.353491 | -3.814376 | 4.362205  |
| H | -2.862437 | -3.320499 | 3.540253  |
| S | 0.392879  | -0.245094 | 1.985476  |
| H | 4.00528   | -1.382797 | 0.307318  |
| H | 4.433749  | -2.504281 | -1.85825  |

|                                               |                             |
|-----------------------------------------------|-----------------------------|
| Zero-point correction =                       | 0.444093 (Hartree/Particle) |
| Thermal correction to Energy =                | 0.479679                    |
| Thermal correction to Enthalpy =              | 0.480702                    |
| Thermal correction to Gibbs Free Energy =     | 0.370022                    |
| Sum of electronic and zero-point Energies =   | -1908.201458                |
| Sum of electronic and thermal Energies =      | -1908.165873                |
| Sum of electronic and thermal Enthalpies =    | -1908.164850                |
| Sum of electronic and thermal Free Energies = | -1908.275530                |
| SCF Done: E(RM062X) =                         | -1908.64555155 A.U.         |

**Product for substrate 2-phenylethynyl-phenol**

|   |           |           |           |
|---|-----------|-----------|-----------|
| C | -0.194313 | 1.376084  | 0.186487  |
| C | -1.054382 | 0.452926  | 0.774462  |
| C | -1.878749 | 0.875913  | 1.817648  |
| C | -1.843828 | 2.200118  | 2.238597  |
| C | -0.986076 | 3.110511  | 1.624651  |
| C | -0.147844 | 2.699545  | 0.592964  |
| H | -0.965355 | 4.142872  | 1.952532  |
| H | 0.532923  | 3.381731  | 0.098392  |
| O | 0.599238  | 0.941302  | -0.867473 |
| C | -1.07336  | -0.932416 | 0.254941  |
| C | -2.127004 | -1.569839 | -0.26962  |
| C | -3.47689  | -1.020964 | -0.497268 |
| C | -4.569629 | -1.889518 | -0.390231 |
| C | -3.708121 | 0.311602  | -0.863078 |
| C | -5.864813 | -1.431623 | -0.6007   |
| H | -4.396382 | -2.929342 | -0.133568 |
| C | -5.002884 | 0.764047  | -1.083932 |
| H | -2.873895 | 0.990029  | -0.995513 |
| C | -6.085365 | -0.101368 | -0.944649 |
| H | -6.700038 | -2.115358 | -0.503424 |

|   |           |           |           |
|---|-----------|-----------|-----------|
| H | -5.16651  | 1.795698  | -1.372972 |
| H | -7.093765 | 0.257211  | -1.115146 |
| H | -2.003044 | -2.61432  | -0.545464 |
| C | 1.749708  | 0.305766  | -0.468708 |
| C | 1.757159  | -0.902939 | 0.108725  |
| C | 3.020036  | 1.055131  | -0.689356 |
| O | 4.112778  | 0.61786   | -0.423497 |
| O | 2.801625  | 2.25889   | -1.20246  |
| C | 3.051532  | -1.561349 | 0.53391   |
| O | 3.448995  | -1.558224 | 1.664608  |
| O | 3.606611  | -2.206401 | -0.479696 |
| C | 3.978213  | 3.046672  | -1.439748 |
| H | 4.513056  | 3.215152  | -0.504918 |
| H | 4.631169  | 2.541072  | -2.151346 |
| H | 3.621626  | 3.986926  | -1.851046 |
| C | 4.877332  | -2.810867 | -0.193269 |
| H | 4.771334  | -3.562311 | 0.58936   |
| H | 5.199291  | -3.270764 | -1.12332  |
| H | 5.585138  | -2.043199 | 0.12058   |
| S | 0.39411   | -1.922217 | 0.532678  |
| H | -2.489404 | 2.523999  | 3.045908  |
| H | -2.550212 | 0.164066  | 2.284291  |

|                                               |                             |
|-----------------------------------------------|-----------------------------|
| Zero-point correction =                       | 0.320790 (Hartree/Particle) |
| Thermal correction to Energy =                | 0.347717                    |
| Thermal correction to Enthalpy =              | 0.348741                    |
| Thermal correction to Gibbs Free Energy =     | 0.258646                    |
| Sum of electronic and zero-point Energies =   | -1545.574639                |
| Sum of electronic and thermal Energies =      | -1545.547711                |
| Sum of electronic and thermal Enthalpies =    | -1545.546688                |
| Sum of electronic and thermal Free Energies = | -1545.636783                |
| SCF Done: E(RM062X) =                         | -1545.89542880 A.U.         |

### Et<sub>3</sub>N

|   |           |           |           |
|---|-----------|-----------|-----------|
| N | -0.18598  | 0.014731  | 0.421796  |
| C | 0.237754  | 1.12019   | -0.439469 |
| C | -1.37172  | -0.651809 | -0.119231 |
| C | 0.889379  | -0.9387   | 0.712614  |
| C | 1.440079  | 1.878871  | 0.106666  |
| H | 0.454206  | 0.769599  | -1.463502 |
| H | -0.601014 | 1.814567  | -0.519683 |
| C | -2.635442 | 0.192021  | 0.008842  |
| H | -1.22996  | -0.938104 | -1.17506  |

|   |           |           |           |
|---|-----------|-----------|-----------|
| H | -1.511046 | -1.578251 | 0.444951  |
| C | 1.538293  | -1.616811 | -0.497335 |
| H | 1.65832   | -0.422077 | 1.292312  |
| H | 0.468797  | -1.702342 | 1.372776  |
| H | 2.359916  | 1.292843  | 0.049795  |
| H | 1.271494  | 2.154461  | 1.151006  |
| H | 1.593546  | 2.793932  | -0.469222 |
| H | -2.618913 | 1.06617   | -0.644609 |
| H | -2.754248 | 0.534661  | 1.039606  |
| H | -3.510969 | -0.403045 | -0.261426 |
| H | 0.804279  | -2.165789 | -1.092524 |
| H | 2.032918  | -0.892428 | -1.149549 |
| H | 2.294467  | -2.329888 | -0.159967 |

|                                               |                             |
|-----------------------------------------------|-----------------------------|
| Zero-point correction =                       | 0.206950 (Hartree/Particle) |
| Thermal correction to Energy =                | 0.217524                    |
| Thermal correction to Enthalpy =              | 0.218547                    |
| Thermal correction to Gibbs Free Energy =     | 0.169715                    |
| Sum of electronic and zero-point Energies =   | -292.139089                 |
| Sum of electronic and thermal Energies =      | -292.128515                 |
| Sum of electronic and thermal Enthalpies =    | -292.127491                 |
| Sum of electronic and thermal Free Energies = | -292.176323                 |
| SCF Done: E(RM062X) =                         | -292.346038241 A.U.         |

### Et<sub>3</sub>NH<sup>+</sup>

|   |           |           |           |
|---|-----------|-----------|-----------|
| N | -0.177986 | 0.004951  | 0.409923  |
| C | 0.27209   | 1.14599   | -0.461312 |
| C | -1.412266 | -0.658478 | -0.140851 |
| C | 0.911659  | -0.99116  | 0.713086  |
| C | 1.50664   | 1.839337  | 0.078585  |
| H | 0.432681  | 0.731618  | -1.456686 |
| H | -0.565188 | 1.839577  | -0.506571 |
| C | -2.63592  | 0.2307    | -0.031649 |
| H | -1.193957 | -0.920304 | -1.175497 |
| H | -1.549134 | -1.574164 | 0.434015  |
| C | 1.503406  | -1.623273 | -0.530419 |
| H | 1.668099  | -0.461036 | 1.28945   |
| H | 0.453981  | -1.739052 | 1.36004   |
| H | 2.400525  | 1.220574  | -0.005154 |
| H | 1.369879  | 2.128456  | 1.1238    |
| H | 1.670472  | 2.747568  | -0.502718 |
| H | -2.580474 | 1.101801  | -0.684103 |
| H | -2.786619 | 0.562778  | 0.998445  |

|   |           |           |           |
|---|-----------|-----------|-----------|
| H | -3.509688 | -0.351699 | -0.327216 |
| H | 0.749484  | -2.142879 | -1.123702 |
| H | 2.011955  | -0.890956 | -1.159781 |
| H | 2.242691  | -2.359342 | -0.211476 |
| H | -0.442451 | 0.413704  | 1.313053  |

|                                               |                             |
|-----------------------------------------------|-----------------------------|
| Zero-point correction =                       | 0.223502 (Hartree/Particle) |
| Thermal correction to Energy =                | 0.233898                    |
| Thermal correction to Enthalpy =              | 0.234922                    |
| Thermal correction to Gibbs Free Energy =     | 0.186783                    |
| Sum of electronic and zero-point Energies =   | -292.591206                 |
| Sum of electronic and thermal Energies =      | -292.580810                 |
| Sum of electronic and thermal Enthalpies =    | -292.579786                 |
| Sum of electronic and thermal Free Energies = | -292.627925                 |
| SCF Done: E(RM062X) =                         | -292.814707991 A.U.         |

#### Reactant 1a

|   |           |           |           |
|---|-----------|-----------|-----------|
| C | 1.470516  | -0.233665 | -1.267785 |
| C | 2.824416  | -0.326966 | -1.422535 |
| C | 3.661617  | -0.060519 | -0.32543  |
| C | 3.081229  | 0.292855  | 0.901376  |
| C | 1.712079  | 0.366913  | 0.984251  |
| N | 0.928347  | 0.112733  | -0.078184 |
| H | 0.769095  | -0.424756 | -2.068371 |
| H | 3.252535  | -0.602426 | -2.376457 |
| H | 3.669156  | 0.507262  | 1.781548  |
| H | 1.198005  | 0.628019  | 1.899937  |
| O | 4.96194   | -0.165575 | -0.536066 |
| C | 5.856506  | 0.097231  | 0.551786  |
| H | 6.854388  | -0.048598 | 0.147925  |
| H | 5.741375  | 1.125953  | 0.898936  |
| H | 5.678676  | -0.604882 | 1.368569  |
| C | -0.507411 | 0.200011  | 0.05066   |
| C | -1.209289 | -0.962484 | 0.219683  |
| C | -0.99456  | 1.576579  | -0.011117 |
| O | -0.270979 | 2.540001  | -0.140748 |
| O | -2.324911 | 1.667015  | 0.097107  |
| C | -2.709437 | -0.882751 | 0.370384  |
| O | -3.280485 | -0.879552 | 1.426264  |
| O | -3.309281 | -0.892842 | -0.816894 |
| C | -2.86317  | 2.993106  | 0.059968  |
| H | -2.452771 | 3.593019  | 0.872585  |



|   |           |           |           |
|---|-----------|-----------|-----------|
| H | -2.638376 | 3.468001  | -0.895551 |
| H | -3.937163 | 2.877858  | 0.181856  |
| C | -4.7388   | -0.813221 | -0.775225 |
| H | -5.153926 | -1.678016 | -0.256496 |
| H | -5.048627 | 0.101355  | -0.267707 |
| H | -5.064497 | -0.801259 | -1.812112 |
| S | -0.567422 | -2.535349 | 0.301201  |

|                                               |                             |
|-----------------------------------------------|-----------------------------|
| Zero-point correction =                       | 0.245986 (Hartree/Particle) |
| Thermal correction to Energy =                | 0.267897                    |
| Thermal correction to Enthalpy =              | 0.268921                    |
| Thermal correction to Gibbs Free Energy =     | 0.190224                    |
| Sum of electronic and zero-point Energies =   | -1293.799195                |
| Sum of electronic and thermal Energies =      | -1293.777283                |
| Sum of electronic and thermal Enthalpies =    | -1293.776260                |
| Sum of electronic and thermal Free Energies = | -1293.854956                |
| SCF Done: E(RM062X) =                         | -1294.04518054 A.U          |

#### Product 4-methoxypyridine

|   |           |           |           |
|---|-----------|-----------|-----------|
| C | 1.857674  | -0.913996 | -0.000026 |
| C | 0.526702  | -1.285702 | 0.000009  |
| C | -0.448808 | -0.283345 | 0.000013  |
| C | -0.028345 | 1.04678   | -0.00002  |
| C | 1.340741  | 1.29723   | -0.000054 |
| N | 2.283427  | 0.356809  | -0.000057 |
| H | 2.628348  | -1.678647 | -0.000029 |
| H | 0.230079  | -2.326888 | 0.000034  |
| H | -0.723988 | 1.874488  | -0.000022 |
| H | 1.687754  | 2.326279  | -0.000079 |
| O | -1.730239 | -0.684067 | 0.00005   |
| C | -2.738297 | 0.321934  | 0.000061  |
| H | -3.687473 | -0.208698 | 0.000096  |
| H | -2.667377 | 0.945482  | 0.89493   |
| H | -2.667426 | 0.945453  | -0.894833 |

|                                               |                             |
|-----------------------------------------------|-----------------------------|
| Zero-point correction =                       | 0.122609 (Hartree/Particle) |
| Thermal correction to Energy =                | 0.130290                    |
| Thermal correction to Enthalpy =              | 0.131314                    |
| Thermal correction to Gibbs Free Energy =     | 0.088455                    |
| Sum of electronic and zero-point Energies =   | -362.637286                 |
| Sum of electronic and thermal Energies =      | -362.629605                 |
| Sum of electronic and thermal Enthalpies =    | -362.628582                 |
| Sum of electronic and thermal Free Energies = | -362.671440                 |

SCF Done: E(RM062X) =

-362.759895294 A.U.

**Cartesian coordinates for reaction of substrate 1-(phenylethynyl)naphthalen-2-ol (2a)**  
**1-(phenylethynyl)naphthalen-2-ol (2a)**

|   |           |           |           |
|---|-----------|-----------|-----------|
| O | 0.579926  | 3.013016  | -0.000013 |
| H | -0.325588 | 2.66838   | -0.000024 |
| C | -0.332    | 0.364442  | -0.000011 |
| C | -1.525657 | 0.169043  | 0.000007  |
| C | -2.934079 | -0.081623 | 0.000005  |
| C | -3.415034 | -1.398455 | -0.000081 |
| C | -3.842183 | 0.986218  | 0.000009  |
| C | -4.782497 | -1.637349 | -0.000081 |
| H | -2.711295 | -2.222486 | -0.000147 |
| C | -5.20769  | 0.736197  | 0.000087  |
| H | -3.469155 | 2.003606  | 0.000158  |
| C | -5.681277 | -0.573394 | 0.000002  |
| H | -5.147827 | -2.657482 | -0.000148 |
| H | -5.904009 | 1.566488  | 0.000152  |
| H | -6.747873 | -0.764527 | 0.000001  |
| C | 1.061504  | 0.660613  | -0.000008 |
| C | 2.052372  | -0.376334 | -0.000002 |
| C | 1.456766  | 1.990264  | -0.000009 |
| C | 1.706502  | -1.75009  | -0.000001 |
| C | 3.425706  | -0.01699  | 0.000001  |
| C | 2.829     | 2.336891  | -0.000005 |
| C | 2.682608  | -2.714954 | 0.000005  |
| H | 0.659321  | -2.030812 | -0.000003 |
| C | 4.410428  | -1.035969 | 0.000007  |
| C | 3.781845  | 1.360156  | 0         |
| H | 3.089421  | 3.388376  | -0.000006 |
| C | 4.049914  | -2.358768 | 0.000008  |
| H | 2.403113  | -3.762168 | 0.000006  |
| H | 5.455649  | -0.745324 | 0.000009  |
| H | 4.833517  | 1.625363  | 0.000003  |
| H | 4.807945  | -3.13293  | 0.000012  |

Zero-point correction =

0.244182 (Hartree/Particle)

Thermal correction to Energy =

0.261363

Thermal correction to Enthalpy =

0.262387

Thermal correction to Gibbs Free Energy =

0.195141

Sum of electronic and zero-point Energies =

-767.979748

Sum of electronic and thermal Energies =

-767.962566

Sum of electronic and thermal Enthalpies =

-767.961543

Sum of electronic and thermal Free Energies = -768.028789  
SCF Done: E(RM062X) = -768.223929678 A.U.

**Complex for substrate 1-(phenylethynyl)naphthalen-2-ol  
(2a)**

|   |           |           |           |
|---|-----------|-----------|-----------|
| C | 0.781942  | 0.767988  | -0.020813 |
| C | -0.539496 | 1.210497  | -0.046156 |
| C | 1.575611  | 3.059709  | -0.078759 |
| C | 1.839624  | 1.721323  | -0.038292 |
| H | 2.39109   | 3.775287  | -0.092017 |
| H | 2.862624  | 1.3622    | -0.022873 |
| O | 1.031074  | -0.53695  | 0.024293  |
| C | -1.589947 | 0.248821  | -0.028353 |
| C | -2.488007 | -0.560495 | -0.011992 |
| C | -3.534701 | -1.535224 | 0.009024  |
| C | -4.879153 | -1.137759 | -0.009316 |
| C | -3.222463 | -2.901999 | 0.048553  |
| C | -5.887966 | -2.091614 | 0.012168  |
| H | -5.120592 | -0.081688 | -0.039949 |
| C | -4.238145 | -3.848197 | 0.069754  |
| H | -2.18286  | -3.207369 | 0.063009  |
| C | -5.571924 | -3.447461 | 0.051705  |
| H | -6.924441 | -1.775516 | -0.002035 |
| H | -3.987814 | -4.902187 | 0.100437  |
| H | -6.362154 | -4.188807 | 0.068597  |
| H | 2.040273  | -0.754748 | 0.05795   |
| N | 3.519271  | -1.343499 | 0.09324   |
| C | 4.309129  | -0.739175 | 1.182752  |
| C | 3.27235   | -2.776229 | 0.353639  |
| C | 4.123182  | -1.08784  | -1.228706 |
| H | 4.665771  | 0.231319  | 0.827226  |
| H | 5.196192  | -1.350987 | 1.394528  |
| C | 3.499374  | -0.538163 | 2.457693  |
| H | 2.720769  | -2.840456 | 1.293361  |
| H | 4.225714  | -3.30191  | 0.501179  |
| C | 2.459065  | -3.454821 | -0.740065 |
| H | 3.396133  | -1.378468 | -1.990266 |
| H | 4.24829   | -0.005177 | -1.312416 |
| C | 5.457806  | -1.781087 | -1.488205 |
| H | 3.193713  | -1.484092 | 2.907567  |
| H | 4.105635  | -0.004681 | 3.192882  |
| H | 2.602809  | 0.055551  | 2.262061  |
| H | 3.024026  | -3.560981 | -1.668199 |

|   |           |           |           |
|---|-----------|-----------|-----------|
| H | 2.175624  | -4.455263 | -0.40741  |
| H | 1.544886  | -2.89476  | -0.951086 |
| H | 5.831958  | -1.489171 | -2.471856 |
| H | 6.20929   | -1.498141 | -0.747509 |
| H | 5.357587  | -2.868956 | -1.479785 |
| C | 0.240723  | 3.546394  | -0.103903 |
| C | -0.040221 | 4.934866  | -0.144576 |
| C | -0.830807 | 2.613781  | -0.089434 |
| C | -1.33343  | 5.388973  | -0.169301 |
| H | 0.79272   | 5.630332  | -0.155328 |
| C | -2.158801 | 3.112228  | -0.115723 |
| C | -2.400672 | 4.462502  | -0.154487 |
| H | -1.541781 | 6.451796  | -0.199999 |
| H | -2.984993 | 2.410651  | -0.104433 |
| H | -3.422407 | 4.824207  | -0.173902 |

|                                               |                             |
|-----------------------------------------------|-----------------------------|
| Zero-point correction =                       | 0.452455 (Hartree/Particle) |
| Thermal correction to Energy =                | 0.481800                    |
| Thermal correction to Enthalpy =              | 0.482823                    |
| Thermal correction to Gibbs Free Energy =     | 0.386522                    |
| Sum of electronic and zero-point Energies =   | -1060.138490                |
| Sum of electronic and thermal Energies =      | -1060.109146                |
| Sum of electronic and thermal Enthalpies =    | -1060.108123                |
| Sum of electronic and thermal Free Energies = | -1060.204423                |
| SCF Done: E(RM062X) =                         | -1060.59094545 A.U.         |

**IM1 for substrate 1-(phenylethynyl)naphthalen-2-ol (2a)**

|   |          |           |           |
|---|----------|-----------|-----------|
| C | 1.25029  | 2.135694  | -0.052136 |
| C | 0.870528 | 0.717668  | -0.395712 |
| C | 1.849426 | -0.378739 | -0.220765 |
| C | 3.136819 | -0.066382 | 0.250176  |
| C | 3.482877 | 1.315279  | 0.561064  |
| C | 2.622988 | 2.336969  | 0.42807   |
| H | 0.537761 | -1.956051 | -0.860706 |
| C | 1.531421 | -1.709188 | -0.50294  |
| C | 4.079311 | -1.086655 | 0.422909  |
| H | 4.491398 | 1.499235  | 0.919558  |
| H | 2.900991 | 3.35637   | 0.668998  |
| C | 3.754087 | -2.40307  | 0.1366    |
| C | 2.474616 | -2.711788 | -0.326504 |
| H | 5.068889 | -0.830425 | 0.786013  |
| H | 4.488626 | -3.187553 | 0.273093  |
| H | 2.212158 | -3.739201 | -0.549743 |

|   |           |           |           |
|---|-----------|-----------|-----------|
| O | 0.467814  | 3.058569  | -0.169578 |
| C | -0.349271 | 0.508337  | -0.84762  |
| C | -1.556187 | 0.30936   | -1.294319 |
| C | -2.733442 | -0.012605 | -0.461755 |
| C | -2.636507 | -0.164613 | 0.926212  |
| C | -3.97467  | -0.175482 | -1.080874 |
| C | -3.762995 | -0.471474 | 1.675495  |
| H | -1.67542  | -0.040307 | 1.41441   |
| C | -5.102714 | -0.482936 | -0.326709 |
| H | -4.052349 | -0.058623 | -2.156461 |
| C | -5.000151 | -0.631824 | 1.051989  |
| H | -3.678102 | -0.587061 | 2.749762  |
| H | -6.060685 | -0.606021 | -0.818321 |
| H | -5.877872 | -0.871809 | 1.640521  |
| H | -1.716467 | 0.381589  | -2.369592 |

|                                               |                             |
|-----------------------------------------------|-----------------------------|
| Zero-point correction =                       | 0.230671 (Hartree/Particle) |
| Thermal correction to Energy =                | 0.247609                    |
| Thermal correction to Enthalpy =              | 0.248632                    |
| Thermal correction to Gibbs Free Energy =     | 0.181579                    |
| Sum of electronic and zero-point Energies =   | -767.505555                 |
| Sum of electronic and thermal Energies =      | -767.488617                 |
| Sum of electronic and thermal Enthalpies =    | -767.487594                 |
| Sum of electronic and thermal Free Energies = | -767.554647                 |
| SCF Done: E(RM062X) =                         | -767.736226577 A.U.         |

**TS1 for substrate 1-(phenylethynyl)naphthalen-2-ol  
(2a)**

|   |           |           |           |
|---|-----------|-----------|-----------|
| C | -1.767041 | -0.086002 | 2.029991  |
| C | -1.518345 | 0.405016  | 0.662566  |
| C | -4.175951 | -0.067017 | 1.516556  |
| C | -3.177001 | -0.275176 | 2.393933  |
| H | -5.207239 | -0.228497 | 1.817583  |
| H | -3.370008 | -0.607735 | 3.40779   |
| O | -0.86612  | -0.355623 | 2.823036  |
| C | -0.233961 | 0.597227  | 0.296354  |
| C | 0.984906  | 0.601143  | -0.065663 |
| C | 2.020497  | 1.64247   | -0.109656 |
| C | 1.786756  | 2.934513  | 0.382004  |
| C | 3.276686  | 1.342818  | -0.646587 |
| C | 2.785065  | 3.897372  | 0.332566  |
| H | 0.816702  | 3.172729  | 0.805055  |
| C | 4.276709  | 2.309224  | -0.69511  |

|   |           |           |           |
|---|-----------|-----------|-----------|
| H | 3.462136  | 0.346729  | -1.034977 |
| C | 4.033785  | 3.588205  | -0.205711 |
| H | 2.591586  | 4.892508  | 0.716502  |
| H | 5.244546  | 2.062698  | -1.116246 |
| H | 4.811569  | 4.342081  | -0.242151 |
| H | 1.389625  | -0.652377 | -0.257099 |
| N | 1.759409  | -1.98739  | -0.250507 |
| C | 2.92651   | -2.141385 | 0.644544  |
| H | 3.77135   | -1.662043 | 0.143836  |
| H | 3.162117  | -3.206655 | 0.749307  |
| C | 0.54835   | -2.63121  | 0.3069    |
| H | 0.26953   | -2.049865 | 1.191399  |
| H | 0.79746   | -3.645287 | 0.642539  |
| C | 2.079975  | -2.365767 | -1.641145 |
| H | 1.239733  | -2.060264 | -2.26703  |
| H | 2.937066  | -1.756268 | -1.938849 |
| C | -0.627212 | -2.661223 | -0.661284 |
| H | -0.488406 | -3.394594 | -1.457923 |
| H | -1.529964 | -2.930672 | -0.108614 |
| H | -0.797125 | -1.683002 | -1.116256 |
| C | 2.390287  | -3.843531 | -1.850625 |
| H | 2.553869  | -4.027676 | -2.914422 |
| H | 3.292558  | -4.148238 | -1.317449 |
| H | 1.564389  | -4.479378 | -1.523745 |
| C | 2.723975  | -1.522571 | 2.021047  |
| H | 1.983103  | -2.064512 | 2.61055   |
| H | 3.671136  | -1.56055  | 2.562673  |
| H | 2.412144  | -0.478433 | 1.952999  |
| C | -3.943073 | 0.365496  | 0.15218   |
| C | -2.621316 | 0.604641  | -0.279243 |
| C | -5.0147   | 0.545929  | -0.735958 |
| C | -2.41484  | 1.019873  | -1.60528  |
| C | -4.793193 | 0.952798  | -2.038674 |
| H | -6.023085 | 0.358695  | -0.381113 |
| C | -3.482453 | 1.18828   | -2.469941 |
| H | -1.404271 | 1.21281   | -1.948915 |
| H | -5.624799 | 1.08937   | -2.719413 |
| H | -3.299115 | 1.508407  | -3.489358 |

|                                             |                             |
|---------------------------------------------|-----------------------------|
| Zero-point correction =                     | 0.448292 (Hartree/Particle) |
| Thermal correction to Energy =              | 0.477006                    |
| Thermal correction to Enthalpy =            | 0.478029                    |
| Thermal correction to Gibbs Free Energy =   | 0.385298                    |
| Sum of electronic and zero-point Energies = | -1060.101726                |

|                                               |                     |
|-----------------------------------------------|---------------------|
| Sum of electronic and thermal Energies =      | -1060.073012        |
| Sum of electronic and thermal Enthalpies =    | -1060.071989        |
| Sum of electronic and thermal Free Energies = | -1060.164720        |
| SCF Done: E(RM062X) =                         | -1060.55001791 A.U. |

**IM2 for substrate 1-(phenylethynyl)naphthalen-2-ol (2a)**

|   |           |           |           |
|---|-----------|-----------|-----------|
| C | -1.443507 | 2.09886   | -0.000002 |
| C | -1.059918 | 0.708719  | 0.000005  |
| C | -2.02777  | -0.345969 | 0.000009  |
| C | -3.417645 | -0.032737 | 0.000004  |
| C | -3.805654 | 1.347057  | -0.000006 |
| C | -2.886953 | 2.342846  | -0.00001  |
| H | -0.619085 | -1.988808 | 0.000022  |
| C | -1.670065 | -1.721495 | 0.000018  |
| C | -4.376235 | -1.065972 | 0.000009  |
| H | -4.86751  | 1.579073  | -0.000011 |
| H | -3.191274 | 3.384963  | -0.000018 |
| C | -3.999876 | -2.391047 | 0.000018  |
| C | -2.627066 | -2.710473 | 0.000023  |
| H | -5.427503 | -0.792705 | 0.000005  |
| H | -4.744674 | -3.178036 | 0.000022  |
| H | -2.318991 | -3.750676 | 0.00003   |
| O | -0.636202 | 3.050747  | -0.000009 |
| C | 0.323805  | 0.414788  | 0.000013  |
| C | 1.513254  | 0.16881   | 0.000012  |
| C | 2.919631  | -0.071752 | -0.000002 |
| C | 3.43319   | -1.379133 | -0.000006 |
| C | 3.819715  | 1.007535  | -0.000009 |
| C | 4.804899  | -1.595469 | -0.000016 |
| H | 2.74605   | -2.217452 | 0         |
| C | 5.189135  | 0.781124  | -0.000019 |
| H | 3.427206  | 2.017732  | -0.000005 |
| C | 5.689562  | -0.519351 | -0.000023 |
| H | 5.185423  | -2.610626 | -0.000019 |
| H | 5.869685  | 1.625018  | -0.000024 |
| H | 6.759279  | -0.692507 | -0.000031 |

|                                             |                             |
|---------------------------------------------|-----------------------------|
| Zero-point correction =                     | 0.243333 (Hartree/Particle) |
| Thermal correction to Energy =              | 0.260400                    |
| Thermal correction to Enthalpy =            | 0.261423                    |
| Thermal correction to Gibbs Free Energy =   | 0.193743                    |
| Sum of electronic and zero-point Energies = | -767.963301                 |
| Sum of electronic and thermal Energies =    | -767.946234                 |

|                                               |                     |
|-----------------------------------------------|---------------------|
| Sum of electronic and thermal Enthalpies =    | -767.945211         |
| Sum of electronic and thermal Free Energies = | -768.012891         |
| SCF Done: E(RM062X) =                         | -768.206634002 A.U. |

**TS2 for substrate 1-(phenylethynyl)naphthalen-2-ol (2a)**

|   |           |           |           |
|---|-----------|-----------|-----------|
| C | -1.595259 | -1.426582 | 1.882287  |
| C | -1.876527 | -1.340956 | 0.448633  |
| C | -2.927875 | -2.153749 | -0.163153 |
| C | -3.715086 | -2.985858 | 0.664938  |
| C | -3.441368 | -3.037955 | 2.085049  |
| C | -2.457571 | -2.319455 | 2.659344  |
| H | -2.613689 | -1.502091 | -2.194716 |
| C | -3.2097   | -2.128652 | -1.541302 |
| C | -4.749566 | -3.755724 | 0.108518  |
| H | -4.064268 | -3.691076 | 2.689611  |
| H | -2.258723 | -2.373722 | 3.723849  |
| C | -5.011759 | -3.716127 | -1.24717  |
| C | -4.230485 | -2.896386 | -2.071529 |
| H | -5.340211 | -4.385491 | 0.766015  |
| H | -5.810721 | -4.313549 | -1.669525 |
| H | -4.425228 | -2.861252 | -3.137415 |
| O | -0.691606 | -0.78376  | 2.426952  |
| C | -1.103654 | -0.519649 | -0.320712 |
| C | -1.010704 | 0.530789  | -1.110456 |
| C | -2.017576 | 1.614083  | -1.145525 |
| C | -1.878359 | 2.612381  | -2.117097 |
| C | -3.06218  | 1.71601   | -0.219594 |
| C | -2.760112 | 3.685493  | -2.164941 |
| H | -1.064861 | 2.543601  | -2.832268 |
| C | -3.942073 | 2.790545  | -0.269051 |
| H | -3.179647 | 0.956309  | 0.545409  |
| C | -3.794393 | 3.780181  | -1.237993 |
| H | -2.637078 | 4.449659  | -2.923838 |
| H | -4.744352 | 2.858432  | 0.457116  |
| H | -4.480935 | 4.618088  | -1.270585 |
| H | -0.15697  | 0.65174   | -1.767888 |
| C | 1.761783  | 2.362411  | -0.588807 |
| C | 0.848563  | 3.326619  | -0.283306 |
| C | 0.033887  | 3.17097   | 0.856131  |
| C | 0.209522  | 2.042491  | 1.663045  |
| C | 1.155079  | 1.110876  | 1.303715  |
| N | 1.904932  | 1.262473  | 0.197032  |
| H | 2.400144  | 2.411355  | -1.460133 |



|   |           |           |           |
|---|-----------|-----------|-----------|
| H | 0.728767  | 4.192943  | -0.919417 |
| H | -0.388869 | 1.845705  | 2.539916  |
| H | 1.307221  | 0.204924  | 1.871385  |
| O | -0.862533 | 4.11807   | 1.069971  |
| C | -1.710307 | 4.004666  | 2.218141  |
| H | -2.384648 | 4.855435  | 2.167325  |
| H | -2.281872 | 3.075845  | 2.18232   |
| H | -1.11486  | 4.052235  | 3.132472  |
| C | 2.905577  | 0.276623  | -0.131854 |
| C | 2.542092  | -1.000466 | -0.424038 |
| C | 4.273127  | 0.817861  | -0.027943 |
| O | 4.513341  | 1.947366  | 0.330148  |
| O | 5.212429  | -0.061126 | -0.375331 |
| C | 3.620316  | -2.023441 | -0.713743 |
| O | 3.950201  | -2.34916  | -1.819774 |
| O | 4.075783  | -2.559885 | 0.41214   |
| C | 6.567285  | 0.395366  | -0.267521 |
| H | 6.801384  | 0.639708  | 0.768883  |
| H | 7.182728  | -0.431417 | -0.611926 |
| H | 6.72139   | 1.271787  | -0.896911 |
| C | 5.105306  | -3.543635 | 0.243098  |
| H | 4.733731  | -4.384592 | -0.342967 |
| H | 5.967208  | -3.098888 | -0.256077 |
| H | 5.371132  | -3.866803 | 1.245952  |
| S | 0.978117  | -1.711288 | -0.503853 |

|                                               |                             |
|-----------------------------------------------|-----------------------------|
| Zero-point correction =                       | 0.489770 (Hartree/Particle) |
| Thermal correction to Energy =                | 0.529592                    |
| Thermal correction to Enthalpy =              | 0.530616                    |
| Thermal correction to Gibbs Free Energy =     | 0.411346                    |
| Sum of electronic and zero-point Energies =   | -2061.760060                |
| Sum of electronic and thermal Energies =      | -2061.720238                |
| Sum of electronic and thermal Enthalpies =    | -2061.719215                |
| Sum of electronic and thermal Free Energies = | -2061.838485                |
| SCF Done: E(RM062X) =                         | -2062.24983064 A.U.         |

**IM3 for substrate 1-(phenylethynyl)naphthalen-2-ol (2a)**

|   |           |           |           |
|---|-----------|-----------|-----------|
| C | -1.422414 | -1.682722 | 1.844195  |
| C | -1.617395 | -1.494948 | 0.437559  |
| C | -2.842189 | -1.881995 | -0.205429 |
| C | -3.904082 | -2.428699 | 0.573557  |
| C | -3.707354 | -2.604747 | 1.980187  |
| C | -2.539536 | -2.26673  | 2.576174  |

|   |           |           |           |
|---|-----------|-----------|-----------|
| H | -2.290611 | -1.371164 | -2.24092  |
| C | -3.074548 | -1.760305 | -1.604039 |
| C | -5.120175 | -2.804566 | -0.035609 |
| H | -4.522801 | -3.024467 | 2.56292   |
| H | -2.388689 | -2.405447 | 3.641952  |
| C | -5.315603 | -2.661234 | -1.389318 |
| C | -4.26857  | -2.138698 | -2.173327 |
| H | -5.903274 | -3.216033 | 0.594312  |
| H | -6.253306 | -2.950305 | -1.848695 |
| H | -4.401834 | -2.033368 | -3.244644 |
| O | -0.378781 | -1.347406 | 2.467073  |
| C | -0.525345 | -0.910677 | -0.347251 |
| C | -0.531895 | 0.134943  | -1.195622 |
| C | -1.566824 | 1.166066  | -1.343611 |
| C | -1.490522 | 2.012759  | -2.459151 |
| C | -2.57241  | 1.408123  | -0.394056 |
| C | -2.384701 | 3.062389  | -2.627496 |
| H | -0.709466 | 1.845958  | -3.194293 |
| C | -3.457773 | 2.466219  | -0.558449 |
| H | -2.648955 | 0.77572   | 0.481938  |
| C | -3.37127  | 3.296716  | -1.673334 |
| H | -2.30797  | 3.701194  | -3.499888 |
| H | -4.221475 | 2.643559  | 0.190589  |
| H | -4.067728 | 4.117669  | -1.797825 |
| H | 0.331165  | 0.272756  | -1.844107 |
| C | 1.557629  | 2.421161  | -0.251243 |
| C | 0.615901  | 3.321966  | 0.139235  |
| C | -0.231234 | 3.01407   | 1.224109  |
| C | -0.047302 | 1.801835  | 1.900147  |
| C | 0.935594  | 0.943654  | 1.471516  |
| N | 1.712743  | 1.239189  | 0.410375  |
| H | 2.203901  | 2.586591  | -1.102427 |
| H | 0.485482  | 4.249009  | -0.402148 |
| H | -0.657797 | 1.489144  | 2.735165  |
| H | 1.071248  | -0.022841 | 1.940522  |
| O | -1.156249 | 3.906738  | 1.516204  |
| C | -2.08196  | 3.608116  | 2.568526  |
| H | -2.778517 | 4.441704  | 2.587866  |
| H | -2.613662 | 2.679033  | 2.353838  |
| H | -1.55752  | 3.535781  | 3.523285  |
| C | 2.687418  | 0.294599  | -0.044539 |
| C | 2.407399  | -1.007451 | -0.282059 |
| C | 4.05408   | 0.886561  | -0.134022 |
| O | 4.370034  | 1.890186  | 0.451179  |

|   |          |           |           |
|---|----------|-----------|-----------|
| O | 4.85281  | 0.206394  | -0.948551 |
| C | 3.570429 | -1.961645 | -0.511358 |
| O | 3.711307 | -2.614579 | -1.504915 |
| O | 4.340192 | -2.017002 | 0.566446  |
| C | 6.232749 | 0.606077  | -0.951095 |
| H | 6.319521 | 1.651531  | -1.245373 |
| H | 6.662497 | 0.461478  | 0.041045  |
| H | 6.720815 | -0.036004 | -1.679034 |
| C | 5.51837  | -2.828659 | 0.432142  |
| H | 6.1237   | -2.464785 | -0.399237 |
| H | 6.053353 | -2.72476  | 1.371847  |
| H | 5.241268 | -3.868825 | 0.261123  |
| S | 0.94801  | -1.954699 | -0.302372 |

|                                               |                             |
|-----------------------------------------------|-----------------------------|
| Zero-point correction =                       | 0.491947 (Hartree/Particle) |
| Thermal correction to Energy =                | 0.531284                    |
| Thermal correction to Enthalpy =              | 0.532308                    |
| Thermal correction to Gibbs Free Energy =     | 0.415747                    |
| Sum of electronic and zero-point Energies =   | -2061.779751                |
| Sum of electronic and thermal Energies =      | -2061.740414                |
| Sum of electronic and thermal Enthalpies =    | -2061.739390                |
| Sum of electronic and thermal Free Energies = | -2061.855951                |
| SCF Done: E(RM062X) =                         | -2062.27169804 A.U.         |

**TS3 for substrate 1-(phenylethynyl)naphthalen-2-ol (2a)**

|   |           |           |           |
|---|-----------|-----------|-----------|
| C | -0.634506 | -0.387122 | 1.284284  |
| C | -1.372734 | -0.042864 | 0.150021  |
| C | -2.737961 | -0.434877 | 0.013894  |
| C | -3.360636 | -1.168038 | 1.063859  |
| C | -2.599174 | -1.490833 | 2.224112  |
| C | -1.289159 | -1.131862 | 2.322144  |
| H | -3.054599 | 0.433405  | -1.945865 |
| C | -3.513921 | -0.121528 | -1.135962 |
| C | -4.716546 | -1.555466 | 0.937227  |
| H | -3.083125 | -2.04192  | 3.024565  |
| H | -0.696062 | -1.388505 | 3.192919  |
| C | -5.440139 | -1.238323 | -0.184953 |
| C | -4.825681 | -0.514337 | -1.231264 |
| H | -5.173105 | -2.111023 | 1.750387  |
| H | -6.477396 | -1.539792 | -0.272541 |
| H | -5.397572 | -0.266998 | -2.118574 |
| O | 0.619091  | -0.048901 | 1.414785  |
| C | -0.738253 | 0.82656   | -0.879891 |

|   |           |           |           |
|---|-----------|-----------|-----------|
| C | -0.968088 | 2.13354   | -1.066614 |
| C | -1.918439 | 2.996275  | -0.342088 |
| C | -2.287448 | 2.805409  | 0.997288  |
| C | -2.468382 | 4.085595  | -1.032846 |
| C | -3.197907 | 3.660571  | 1.607276  |
| H | -1.848468 | 1.997496  | 1.568373  |
| C | -3.381735 | 4.936475  | -0.422502 |
| H | -2.177342 | 4.256264  | -2.064347 |
| C | -3.754791 | 4.723899  | 0.901415  |
| H | -3.468669 | 3.497726  | 2.644305  |
| H | -3.799935 | 5.766717  | -0.980156 |
| H | -4.465451 | 5.386093  | 1.38214   |
| H | -0.447943 | 2.624737  | -1.886927 |
| C | 3.426033  | 0.024688  | -1.235184 |
| C | 4.4508    | 0.910798  | -1.389227 |
| C | 4.800294  | 1.755334  | -0.321592 |
| C | 4.088359  | 1.643439  | 0.880597  |
| C | 3.064701  | 0.733686  | 0.97028   |
| N | 2.718033  | -0.045158 | -0.077195 |
| H | 3.142403  | -0.672878 | -2.008601 |
| H | 5.001278  | 0.951859  | -2.318848 |
| H | 4.316472  | 2.245686  | 1.747531  |
| H | 2.481141  | 0.607107  | 1.867264  |
| O | 5.799823  | 2.59077   | -0.529348 |
| C | 6.211274  | 3.451659  | 0.540832  |
| H | 7.035022  | 4.036231  | 0.141382  |
| H | 5.392125  | 4.110793  | 0.833334  |
| H | 6.550924  | 2.860434  | 1.393202  |
| C | 1.691575  | -1.078315 | 0.038084  |
| C | 0.881199  | -1.353673 | -1.031938 |
| C | 2.096769  | -2.131681 | 1.045935  |
| O | 3.246722  | -2.315654 | 1.353197  |
| O | 1.061226  | -2.771064 | 1.548873  |
| C | 0.432192  | -2.729928 | -1.301834 |
| O | 1.040482  | -3.724137 | -0.967234 |
| O | -0.696498 | -2.78395  | -2.016259 |
| C | 1.365615  | -3.900504 | 2.371127  |
| H | 1.940635  | -3.593377 | 3.245206  |
| H | 0.404527  | -4.309057 | 2.672736  |
| H | 1.92814   | -4.636679 | 1.795331  |
| C | -1.150228 | -4.097168 | -2.350712 |
| H | -1.371256 | -4.666051 | -1.44675  |
| H | -2.055603 | -3.954564 | -2.935623 |
| H | -0.397735 | -4.626169 | -2.937197 |

S 0.32563 -0.006024 -2.04785

Zero-point correction = 0.492066 (Hartree/Particle)  
Thermal correction to Energy = 0.530572  
Thermal correction to Enthalpy = 0.531596  
Thermal correction to Gibbs Free Energy = 0.415970  
Sum of electronic and zero-point Energies = -2061.768890  
Sum of electronic and thermal Energies = -2061.730383  
Sum of electronic and thermal Enthalpies = -2061.729360  
Sum of electronic and thermal Free Energies = -2061.844985  
SCF Done: E(RM062X) = -2062.26095552 A.U.

**IM4 for substrate 1-(phenylethynyl)naphthalen-2-ol (2a)**

|   |           |           |           |
|---|-----------|-----------|-----------|
| C | 0.628406  | -0.734708 | -1.046458 |
| C | 1.405258  | -0.174828 | -0.057983 |
| C | 2.782048  | -0.552859 | 0.037655  |
| C | 3.325449  | -1.440878 | -0.932103 |
| C | 2.488074  | -1.951974 | -1.957843 |
| C | 1.163721  | -1.617506 | -2.008322 |
| H | 3.228568  | 0.599238  | 1.816865  |
| C | 3.635215  | -0.065779 | 1.064768  |
| C | 4.697592  | -1.798938 | -0.856544 |
| H | 2.914425  | -2.623428 | -2.695182 |
| H | 0.500287  | -2.007897 | -2.768267 |
| C | 5.496607  | -1.305609 | 0.139376  |
| C | 4.954297  | -0.433394 | 1.112721  |
| H | 5.096965  | -2.474264 | -1.605913 |
| H | 6.542826  | -1.583643 | 0.189887  |
| H | 5.589882  | -0.054973 | 1.904888  |
| O | -0.698519 | -0.368062 | -1.189596 |
| C | 0.797215  | 0.783311  | 0.895397  |
| C | 1.11438   | 2.080556  | 1.017234  |
| C | 2.132172  | 2.833033  | 0.261997  |
| C | 2.802498  | 3.878958  | 0.910682  |
| C | 2.452825  | 2.568196  | -1.076902 |
| C | 3.785592  | 4.613947  | 0.258458  |
| H | 2.552279  | 4.106569  | 1.941863  |
| C | 3.431972  | 3.307347  | -1.729399 |
| H | 1.924393  | 1.790409  | -1.615064 |
| C | 4.108177  | 4.327674  | -1.064697 |
| H | 4.298084  | 5.41188   | 0.783626  |
| H | 3.664127  | 3.088705  | -2.765512 |
| H | 4.873195  | 4.899421  | -1.576935 |

|   |           |           |           |
|---|-----------|-----------|-----------|
| H | 0.606688  | 2.647485  | 1.795929  |
| C | -3.587168 | 0.03599   | 0.8894    |
| C | -4.561342 | 0.974777  | 1.075354  |
| C | -4.60371  | 2.103656  | 0.240735  |
| C | -3.64621  | 2.221949  | -0.774495 |
| C | -2.697674 | 1.235685  | -0.913023 |
| N | -2.66603  | 0.170227  | -0.093955 |
| H | -3.484411 | -0.841302 | 1.509935  |
| H | -5.286445 | 0.859306  | 1.869146  |
| H | -3.620151 | 3.060653  | -1.45453  |
| H | -1.936198 | 1.279918  | -1.675528 |
| O | -5.557916 | 2.985753  | 0.484054  |
| C | -5.623651 | 4.165991  | -0.324884 |
| H | -6.464642 | 4.735382  | 0.060716  |
| H | -4.704508 | 4.746542  | -0.225782 |
| H | -5.80029  | 3.903147  | -1.369609 |
| C | -1.621428 | -0.924193 | -0.244111 |
| C | -1.040496 | -1.274916 | 1.069343  |
| C | -2.385915 | -2.110331 | -0.892987 |
| O | -3.427158 | -2.512049 | -0.448629 |
| O | -1.805988 | -2.552614 | -1.992519 |
| C | -0.533003 | -2.596594 | 1.2174    |
| O | -0.757491 | -3.53663  | 0.455424  |
| O | 0.232364  | -2.781598 | 2.324617  |
| C | -2.343126 | -3.780033 | -2.501131 |
| H | -2.277589 | -4.547166 | -1.729082 |
| H | -3.380329 | -3.645318 | -2.808427 |
| H | -1.72421  | -4.042085 | -3.355354 |
| C | 0.761485  | -4.092614 | 2.484033  |
| H | 1.397104  | -4.364561 | 1.639103  |
| H | 1.353097  | -4.063879 | 3.397376  |
| H | -0.035904 | -4.831781 | 2.580728  |
| S | -0.435183 | 0.076636  | 1.998999  |

|                                               |                             |
|-----------------------------------------------|-----------------------------|
| Zero-point correction =                       | 0.493523 (Hartree/Particle) |
| Thermal correction to Energy =                | 0.531963                    |
| Thermal correction to Enthalpy =              | 0.532987                    |
| Thermal correction to Gibbs Free Energy =     | 0.418007                    |
| Sum of electronic and zero-point Energies =   | -2061.789009                |
| Sum of electronic and thermal Energies =      | -2061.750569                |
| Sum of electronic and thermal Enthalpies =    | -2061.749545                |
| Sum of electronic and thermal Free Energies = | -2061.864525                |
| SCF Done: E(RM062X) =                         | -2062.24868169 A.U.         |

**TS4 for substrate 1-(phenylethynyl)naphthalen-2-ol (2a)**

|   |           |           |           |
|---|-----------|-----------|-----------|
| C | 0.817181  | -0.62217  | -1.140337 |
| C | 1.658237  | -0.341692 | -0.093943 |
| C | 3.005428  | -0.819116 | -0.139141 |
| C | 3.449844  | -1.504446 | -1.303672 |
| C | 2.548053  | -1.718478 | -2.380118 |
| C | 1.249328  | -1.299624 | -2.298794 |
| H | 3.586036  | -0.114742 | 1.824737  |
| C | 3.920842  | -0.623388 | 0.928748  |
| C | 4.794084  | -1.956658 | -1.371662 |
| H | 2.905366  | -2.231813 | -3.266059 |
| H | 0.542006  | -1.466773 | -3.101356 |
| C | 5.657     | -1.744904 | -0.330282 |
| C | 5.210869  | -1.075242 | 0.833643  |
| H | 5.120255  | -2.475116 | -2.267043 |
| H | 6.681602  | -2.092575 | -0.390253 |
| H | 5.897522  | -0.921165 | 1.65783   |
| O | -0.488735 | -0.146059 | -1.10049  |
| C | 1.139815  | 0.481878  | 1.020407  |
| C | 1.600081  | 1.692743  | 1.36872   |
| C | 2.713347  | 2.43816   | 0.754063  |
| C | 3.513845  | 3.234278  | 1.583708  |
| C | 2.998483  | 2.407171  | -0.617808 |
| C | 4.59012   | 3.947077  | 1.06857   |
| H | 3.290441  | 3.282418  | 2.644552  |
| C | 4.071202  | 3.125006  | -1.132075 |
| H | 2.370361  | 1.831905  | -1.287529 |
| C | 4.876563  | 3.890451  | -0.292111 |
| H | 5.203132  | 4.548935  | 1.729626  |
| H | 4.27578   | 3.090817  | -2.196047 |
| H | 5.713983  | 4.44627   | -0.697465 |
| H | 1.143656  | 2.175019  | 2.230636  |
| C | -3.565086 | 0.562431  | 0.699532  |
| C | -4.550578 | 1.51374   | 0.845264  |
| C | -4.65587  | 2.523097  | -0.120574 |
| C | -3.756897 | 2.526565  | -1.191324 |
| C | -2.801627 | 1.522987  | -1.245511 |
| N | -2.712379 | 0.57113   | -0.323026 |
| H | -3.437351 | -0.239133 | 1.422108  |
| H | -5.235332 | 1.494378  | 1.682855  |
| H | -3.784273 | 3.278029  | -1.967517 |
| H | -2.080952 | 1.48036   | -2.053995 |
| O | -5.626255 | 3.424593  | 0.058905  |

|   |           |           |           |
|---|-----------|-----------|-----------|
| C | -5.761293 | 4.464196  | -0.908634 |
| H | -6.597497 | 5.072326  | -0.573079 |
| H | -4.85583  | 5.074322  | -0.950783 |
| H | -5.980578 | 4.048876  | -1.895212 |
| C | -1.362833 | -0.922005 | -0.33674  |
| C | -1.063056 | -1.277669 | 0.956081  |
| C | -2.127849 | -1.890171 | -1.247235 |
| O | -3.244048 | -1.753632 | -1.657679 |
| O | -1.295493 | -2.858375 | -1.618729 |
| C | -1.731156 | -2.436155 | 1.535821  |
| O | -2.522468 | -3.152759 | 0.953616  |
| O | -1.396471 | -2.642064 | 2.819698  |
| C | -1.858437 | -3.855724 | -2.480118 |
| H | -2.692532 | -4.347228 | -1.978266 |
| H | -2.201079 | -3.405636 | -3.412335 |
| H | -1.057578 | -4.565283 | -2.670623 |
| C | -2.023155 | -3.762483 | 3.449288  |
| H | -1.757993 | -4.687597 | 2.936475  |
| H | -1.645251 | -3.775462 | 4.468651  |
| H | -3.107513 | -3.645292 | 3.448832  |
| S | -0.128805 | -0.231657 | 2.04983   |

|                                               |                             |
|-----------------------------------------------|-----------------------------|
| Zero-point correction =                       | 0.491327 (Hartree/Particle) |
| Thermal correction to Energy =                | 0.530018                    |
| Thermal correction to Enthalpy =              | 0.531041                    |
| Thermal correction to Gibbs Free Energy =     | 0.414203                    |
| Sum of electronic and zero-point Energies =   | -2061.774915                |
| Sum of electronic and thermal Energies =      | -2061.736224                |
| Sum of electronic and thermal Enthalpies =    | -2061.735201                |
| Sum of electronic and thermal Free Energies = | -2061.852039                |
| SCF Done: E(RM062X) =                         | -2062.26624224 A.U.         |

**Product for substrate 1-(phenylethynyl)naphthalen-2-ol  
(2a)**

|   |           |          |           |
|---|-----------|----------|-----------|
| C | 0.122424  | 1.099419 | -0.562809 |
| C | -0.7378   | 0.331775 | 0.179583  |
| C | -1.734681 | 0.977462 | 0.974808  |
| C | -1.825062 | 2.397078 | 0.929647  |
| C | -0.920532 | 3.137029 | 0.121846  |
| C | 0.048528  | 2.504809 | -0.607505 |
| H | -2.569447 | -0.81982 | 1.850023  |
| C | -2.640003 | 0.260055 | 1.799888  |
| C | -2.824017 | 3.051708 | 1.697348  |



|   |           |           |           |
|---|-----------|-----------|-----------|
| H | -1.008264 | 4.217637  | 0.098365  |
| H | 0.754653  | 3.045209  | -1.225839 |
| C | -3.689528 | 2.333305  | 2.477578  |
| C | -3.59093  | 0.922915  | 2.530704  |
| H | -2.883688 | 4.133902  | 1.652447  |
| H | -4.449629 | 2.840426  | 3.059973  |
| H | -4.274508 | 0.362873  | 3.158011  |
| O | 1.077968  | 0.453114  | -1.33643  |
| C | -0.586959 | -1.139481 | 0.108032  |
| C | -1.484881 | -2.018446 | -0.354182 |
| C | -2.822601 | -1.71676  | -0.893565 |
| C | -3.842258 | -2.652427 | -0.680768 |
| C | -3.113989 | -0.553991 | -1.618266 |
| C | -5.131421 | -2.4154   | -1.142236 |
| H | -3.618276 | -3.566241 | -0.140356 |
| C | -4.401187 | -0.324463 | -2.08739  |
| H | -2.33036  | 0.162784  | -1.831603 |
| C | -5.415323 | -1.247443 | -1.843566 |
| H | -5.911861 | -3.14479  | -0.959507 |
| H | -4.612212 | 0.576984  | -2.650796 |
| H | -6.418734 | -1.061966 | -2.208633 |
| H | -1.237395 | -3.075697 | -0.295613 |
| C | 2.207147  | 0.1011    | -0.636496 |
| C | 2.218184  | -0.854885 | 0.301593  |
| C | 3.444973  | 0.865353  | -0.962396 |
| O | 4.524412  | 0.631872  | -0.476381 |
| O | 3.214384  | 1.832172  | -1.841307 |
| C | 3.481177  | -1.19526  | 1.06159   |
| O | 3.728603  | -0.759715 | 2.150321  |
| O | 4.197144  | -2.095637 | 0.407248  |
| C | 4.360584  | 2.617698  | -2.2027   |
| H | 4.76726   | 3.116516  | -1.322881 |
| H | 5.124313  | 1.982641  | -2.651726 |
| H | 3.999578  | 3.346678  | -2.92272  |
| C | 5.44944   | -2.439855 | 1.020312  |
| H | 5.282214  | -2.868928 | 2.008372  |
| H | 5.90841   | -3.16941  | 0.359015  |
| H | 6.073712  | -1.549581 | 1.10178   |
| S | 0.877277  | -1.829465 | 0.876737  |

|                                           |                             |
|-------------------------------------------|-----------------------------|
| Zero-point correction =                   | 0.367849 (Hartree/Particle) |
| Thermal correction to Energy =            | 0.397946                    |
| Thermal correction to Enthalpy =          | 0.398969                    |
| Thermal correction to Gibbs Free Energy = | 0.301685                    |

|                                               |                     |
|-----------------------------------------------|---------------------|
| Sum of electronic and zero-point Energies =   | -1699.148420        |
| Sum of electronic and thermal Energies =      | -1699.118323        |
| Sum of electronic and thermal Enthalpies =    | -1699.117300        |
| Sum of electronic and thermal Free Energies = | -1699.214584        |
| SCF Done: E(RM062X) =                         | -1699.51626903 A.U. |

#### Cartesian coordinates for other substrates

##### 4b

|   |           |           |           |
|---|-----------|-----------|-----------|
| C | -4.923909 | 0.838195  | 0.000158  |
| C | -3.531514 | 0.875369  | 0.000135  |
| C | -2.796836 | -0.325317 | -0.000062 |
| C | -3.484458 | -1.547351 | -0.000233 |
| C | -4.869499 | -1.579098 | -0.000184 |
| C | -5.585408 | -0.381278 | 0.000007  |
| H | -5.466569 | 1.77591   | 0.000296  |
| H | -2.909257 | -2.46554  | -0.000398 |
| O | -2.930335 | 2.084982  | 0.000308  |
| H | -1.969089 | 1.970939  | -0.000008 |
| C | -1.370192 | -0.260212 | -0.000081 |
| C | -0.16591  | -0.148697 | -0.000007 |
| C | 1.258072  | -0.027659 | -0.000068 |
| C | 2.07237   | -1.163708 | 0.0003    |
| C | 1.865381  | 1.239922  | -0.000407 |
| C | 3.457729  | -1.052569 | 0.000387  |
| H | 1.615762  | -2.146327 | 0.000529  |
| C | 3.240161  | 1.358001  | -0.000323 |
| H | 1.246287  | 2.129384  | -0.000075 |
| C | 4.048438  | 0.213454  | 0.00011   |
| H | 4.060135  | -1.951027 | 0.000665  |
| H | 3.719085  | 2.329741  | -0.000607 |
| H | -5.390055 | -2.528493 | -0.000303 |
| H | -6.669053 | -0.396981 | 0.000035  |
| O | 5.379953  | 0.433328  | 0.000291  |
| C | 6.241276  | -0.697248 | -0.000205 |
| H | 7.253918  | -0.300211 | -0.000659 |
| H | 6.089269  | -1.30743  | 0.894351  |
| H | 6.088427  | -1.307267 | -0.894715 |

|                                             |                             |
|---------------------------------------------|-----------------------------|
| Zero-point correction =                     | 0.230096 (Hartree/Particle) |
| Thermal correction to Energy =              | 0.247042                    |
| Thermal correction to Enthalpy =            | 0.248065                    |
| Thermal correction to Gibbs Free Energy =   | 0.181684                    |
| Sum of electronic and zero-point Energies = | -728.884112                 |

|                                               |                     |
|-----------------------------------------------|---------------------|
| Sum of electronic and thermal Energies =      | -728.867167         |
| Sum of electronic and thermal Enthalpies =    | -728.866143         |
| Sum of electronic and thermal Free Energies = | -728.932524         |
| SCF Done: E(RM062X) =                         | -729.114208479 A.U. |

**IM2 for substrate 4b**

|   |           |           |           |
|---|-----------|-----------|-----------|
| C | 3.239726  | 0.323264  | 1.006089  |
| C | 2.543775  | 0.269739  | -0.32956  |
| C | 3.196815  | -0.381048 | -1.463231 |
| C | 4.414962  | -0.931375 | -1.324364 |
| C | 5.100648  | -0.887662 | -0.044322 |
| C | 4.563267  | -0.30706  | 1.046307  |
| H | 5.082385  | -0.279245 | 1.99733   |
| O | 2.736434  | 0.850594  | 1.981652  |
| C | 1.346748  | 0.819256  | -0.445752 |
| C | 0.175319  | 1.377047  | -0.550383 |
| C | -1.123069 | 0.720894  | -0.312366 |
| C | -1.21658  | -0.612026 | 0.116105  |
| C | -2.298903 | 1.438296  | -0.515997 |
| C | -2.446967 | -1.19843  | 0.32743   |
| H | -0.312446 | -1.1869   | 0.28741   |
| C | -3.548468 | 0.858493  | -0.306954 |
| H | -2.243355 | 2.470622  | -0.844594 |
| C | -3.625428 | -0.467586 | 0.116495  |
| H | -2.529769 | -2.226506 | 0.659549  |
| H | -4.441169 | 1.445378  | -0.476081 |
| H | 0.151598  | 2.427253  | -0.841028 |
| H | 2.666501  | -0.401208 | -2.408093 |
| H | 4.90262   | -1.414037 | -2.16206  |
| H | 6.082795  | -1.343798 | 0.022372  |
| O | -4.779601 | -1.131291 | 0.349581  |
| C | -5.997888 | -0.429155 | 0.148301  |
| H | -6.791806 | -1.134322 | 0.38437   |
| H | -6.068315 | 0.43504   | 0.814898  |
| H | -6.097463 | -0.102579 | -0.890713 |

|                                             |                             |
|---------------------------------------------|-----------------------------|
| Zero-point correction =                     | 0.228883 (Hartree/Particle) |
| Thermal correction to Energy =              | 0.245836                    |
| Thermal correction to Enthalpy =            | 0.246859                    |
| Thermal correction to Gibbs Free Energy =   | 0.179401                    |
| Sum of electronic and zero-point Energies = | -728.854436                 |
| Sum of electronic and thermal Energies =    | -728.837483                 |
| Sum of electronic and thermal Enthalpies =  | -728.836460                 |

Sum of electronic and thermal Free Energies = -728.903918  
 SCF Done: E(RM062X) = -729.083318949 A.U.

**4c**

|   |           |           |           |
|---|-----------|-----------|-----------|
| C | 5.181792  | 0.920535  | 0.010122  |
| C | 3.788189  | 0.928069  | 0.014395  |
| C | 3.083019  | -0.290102 | -0.00232  |
| C | 3.796453  | -1.498413 | -0.023095 |
| C | 5.180212  | -1.499081 | -0.027476 |
| C | 5.868152  | -0.283796 | -0.010691 |
| H | 5.704299  | 1.869364  | 0.023529  |
| H | 3.240258  | -2.428047 | -0.036025 |
| O | 3.164275  | 2.124018  | 0.034881  |
| H | 2.204786  | 1.996326  | 0.035637  |
| C | 1.657307  | -0.265866 | 0.001171  |
| C | 0.450545  | -0.19859  | 0.004018  |
| C | -0.976178 | -0.140896 | 0.004038  |
| C | -1.724766 | -1.326985 | 0.028746  |
| C | -1.63095  | 1.099432  | -0.022127 |
| C | -3.108179 | -1.277091 | 0.026449  |
| H | -1.215181 | -2.281708 | 0.049166  |
| C | -3.014098 | 1.156572  | -0.024431 |
| H | -1.050511 | 2.013051  | -0.041011 |
| C | -3.725826 | -0.034482 | -0.000513 |
| H | -3.701911 | -2.180579 | 0.044801  |
| H | -3.536475 | 2.102972  | -0.044564 |
| H | 5.723022  | -2.435608 | -0.043984 |
| H | 6.951888  | -0.275702 | -0.013917 |
| N | -5.196808 | 0.023238  | -0.00424  |
| O | -5.720849 | 1.116908  | -0.027454 |
| O | -5.805495 | -1.025746 | 0.015865  |

Zero-point correction = 0.199844 (Hartree/Particle)  
 Thermal correction to Energy = 0.216877  
 Thermal correction to Enthalpy = 0.217900  
 Thermal correction to Gibbs Free Energy = 0.149087  
 Sum of electronic and zero-point Energies = -818.886465  
 Sum of electronic and thermal Energies = -818.869433  
 Sum of electronic and thermal Enthalpies = -818.868410  
 Sum of electronic and thermal Free Energies = -818.937223  
 SCF Done: E(RM062X) = -819.086309600 A.U.

**IM2 for substrate 4c**

|   |           |           |           |
|---|-----------|-----------|-----------|
| C | 3.434503  | -0.00869  | 1.05855   |
| C | 2.771616  | 0.341162  | -0.251984 |
| C | 3.411269  | -0.023961 | -1.51462  |
| C | 4.593343  | -0.661511 | -1.513687 |
| C | 5.251672  | -0.998031 | -0.26185  |
| C | 4.722349  | -0.698863 | 0.939886  |
| H | 5.220194  | -0.954673 | 1.867949  |
| O | 2.930411  | 0.26455   | 2.131509  |
| C | 1.616324  | 0.977232  | -0.22095  |
| C | 0.481286  | 1.613452  | -0.17324  |
| C | -0.84676  | 0.973675  | -0.120268 |
| C | -0.992518 | -0.417672 | -0.052674 |
| C | -1.983557 | 1.786963  | -0.134944 |
| C | -2.251375 | -0.988677 | -0.004968 |
| H | -0.114754 | -1.053276 | -0.032519 |
| C | -3.252136 | 1.228528  | -0.087395 |
| H | -1.871233 | 2.863575  | -0.183744 |
| C | -3.3607   | -0.151748 | -0.024675 |
| H | -2.380577 | -2.06079  | 0.049033  |
| H | -4.139562 | 1.846245  | -0.097698 |
| H | 0.508001  | 2.702154  | -0.172387 |
| H | 2.903144  | 0.238497  | -2.434924 |
| H | 5.074767  | -0.933147 | -2.444799 |
| H | 6.206238  | -1.510945 | -0.31242  |
| N | -4.701859 | -0.754818 | 0.02543   |
| O | -5.659928 | -0.010697 | 0.010573  |
| O | -4.778622 | -1.964488 | 0.07797   |

|                                               |                             |
|-----------------------------------------------|-----------------------------|
| Zero-point correction =                       | 0.198912 (Hartree/Particle) |
| Thermal correction to Energy =                | 0.215813                    |
| Thermal correction to Enthalpy =              | 0.216837                    |
| Thermal correction to Gibbs Free Energy =     | 0.148740                    |
| Sum of electronic and zero-point Energies =   | -818.857787                 |
| Sum of electronic and thermal Energies =      | -818.840885                 |
| Sum of electronic and thermal Enthalpies =    | -818.839862                 |
| Sum of electronic and thermal Free Energies = | -818.907958                 |
| SCF Done: E(RM062X) =                         | -819.056698645 A.U.         |

#### 4d

|   |           |           |           |
|---|-----------|-----------|-----------|
| C | -2.105866 | 0.973108  | -0.000002 |
| C | -0.713517 | 0.923934  | 0.000005  |
| C | -0.053481 | -0.318266 | -0.000001 |

|   |           |           |           |
|---|-----------|-----------|-----------|
| C | -0.81404  | -1.494665 | -0.000002 |
| C | -2.199275 | -1.442645 | 0.000006  |
| C | -2.840723 | -0.203781 | 0.000006  |
| H | -2.589778 | 1.94249   | -0.000022 |
| H | -0.296199 | -2.446465 | -0.000006 |
| O | -0.036388 | 2.093135  | 0.000024  |
| H | 0.915155  | 1.913044  | -0.000176 |
| C | 1.378979  | -0.338569 | -0.000025 |
| C | 2.584877  | -0.298443 | -0.000032 |
| H | -2.776584 | -2.358713 | 0.000021  |
| H | -3.923338 | -0.15345  | 0.000002  |
| C | 4.043617  | -0.273231 | 0.000026  |
| H | 4.438486  | -1.290847 | -0.000788 |
| H | 4.419984  | 0.24282   | -0.885425 |
| H | 4.419957  | 0.241397  | 0.886316  |

|                                               |                             |
|-----------------------------------------------|-----------------------------|
| Zero-point correction =                       | 0.143190 (Hartree/Particle) |
| Thermal correction to Energy =                | 0.153932                    |
| Thermal correction to Enthalpy =              | 0.154956                    |
| Thermal correction to Gibbs Free Energy =     | 0.104243                    |
| Sum of electronic and zero-point Energies =   | -422.745065                 |
| Sum of electronic and thermal Energies =      | -422.734323                 |
| Sum of electronic and thermal Enthalpies =    | -422.733300                 |
| Sum of electronic and thermal Free Energies = | -422.784012                 |
| SCF Done: E(RM062X) =                         | -422.888255519 A.U.         |

**IM2 for substrate 4d**

|   |           |           |           |
|---|-----------|-----------|-----------|
| C | 0.698432  | 1.058221  | -0.042212 |
| C | -0.029551 | -0.250199 | -0.174596 |
| C | 0.712101  | -1.505426 | -0.111532 |
| C | 2.044923  | -1.503765 | 0.066939  |
| C | 2.764166  | -0.249913 | 0.199237  |
| C | 2.147876  | 0.947972  | 0.149999  |
| H | 2.694014  | 1.878976  | 0.249211  |
| O | 0.125745  | 2.133358  | -0.090561 |
| C | -1.343903 | -0.234859 | -0.346097 |
| C | -2.628563 | -0.205921 | -0.507725 |
| H | -3.005057 | -0.166297 | -1.529376 |
| H | 0.153016  | -2.428474 | -0.212569 |
| H | 2.59905   | -2.432794 | 0.114699  |
| H | 3.838846  | -0.291881 | 0.34313   |
| C | -3.632583 | -0.217674 | 0.615155  |
| H | -4.248672 | 0.682797  | 0.566532  |
| H | -4.294145 | -1.080533 | 0.512004  |
| H | -3.140403 | -0.259276 | 1.585854  |

|                                               |                             |
|-----------------------------------------------|-----------------------------|
| Zero-point correction =                       | 0.142305 (Hartree/Particle) |
| Thermal correction to Energy =                | 0.152879                    |
| Thermal correction to Enthalpy =              | 0.153902                    |
| Thermal correction to Gibbs Free Energy =     | 0.103652                    |
| Sum of electronic and zero-point Energies =   | -422.714106                 |
| Sum of electronic and thermal Energies =      | -422.703532                 |
| Sum of electronic and thermal Enthalpies =    | -422.702508                 |
| Sum of electronic and thermal Free Energies = | -422.752759                 |
| SCF Done: E(RM062X) =                         | -422.856410928 A.U.         |

**4e**

|   |           |           |           |
|---|-----------|-----------|-----------|
| C | 2.805691  | 1.560745  | -0.020942 |
| C | 1.415851  | 1.368637  | -0.011931 |
| C | 0.858244  | 0.079083  | -0.016314 |
| C | 1.694224  | -1.064726 | -0.032947 |
| C | 3.043744  | -0.855624 | -0.040996 |
| C | 3.585216  | 0.431429  | -0.034383 |
| H | 3.223704  | 2.558558  | -0.019227 |
| H | 1.266286  | -2.058417 | -0.045894 |
| O | 0.65013   | 2.482406  | 0.006539  |
| H | -0.28542  | 2.233928  | 0.01879   |
| C | -0.560824 | -0.049082 | -0.009705 |

|   |           |           |           |
|---|-----------|-----------|-----------|
| C | -1.76908  | -0.102755 | -0.001172 |
| C | -3.197527 | -0.182744 | 0.004237  |
| C | -3.835224 | -1.431226 | -0.009144 |
| C | -3.969903 | 0.986997  | 0.022493  |
| C | -5.221712 | -1.502367 | -0.004333 |
| H | -3.236983 | -2.334407 | -0.023313 |
| C | -5.35571  | 0.904585  | 0.027109  |
| H | -3.476205 | 1.951582  | 0.032784  |
| C | -5.985027 | -0.337641 | 0.013727  |
| H | -5.707835 | -2.470749 | -0.014952 |
| H | -5.946114 | 1.813136  | 0.041056  |
| H | -7.066931 | -0.397827 | 0.017292  |
| O | 4.939429  | 0.349108  | -0.073938 |
| O | 4.062583  | -1.768732 | -0.101597 |
| C | 5.238849  | -1.024771 | 0.2011    |
| H | 6.053592  | -1.351815 | -0.439407 |
| H | 5.477911  | -1.129501 | 1.264053  |

|                                               |                             |
|-----------------------------------------------|-----------------------------|
| Zero-point correction =                       | 0.213174 (Hartree/Particle) |
| Thermal correction to Energy =                | 0.229810                    |
| Thermal correction to Enthalpy =              | 0.230833                    |
| Thermal correction to Gibbs Free Energy =     | 0.164618                    |
| Sum of electronic and zero-point Energies =   | -802.907247                 |
| Sum of electronic and thermal Energies =      | -802.890611                 |
| Sum of electronic and thermal Enthalpies =    | -802.889588                 |
| Sum of electronic and thermal Free Energies = | -802.955803                 |
| SCF Done: E(RM062X) =                         | -803.120421028 A.U.         |

#### IM2 for substrate 4e

|   |           |           |           |
|---|-----------|-----------|-----------|
| C | 1.225601  | 1.554492  | 0.097494  |
| C | 0.665665  | 0.28737   | -0.531222 |
| C | 1.496288  | -0.909794 | -0.686502 |
| C | 2.75776   | -0.829356 | -0.259067 |
| C | 3.312417  | 0.375874  | 0.332583  |
| C | 2.624144  | 1.515716  | 0.516794  |
| H | 3.062753  | 2.398138  | 0.963105  |
| O | 0.534585  | 2.547026  | 0.236462  |
| C | -0.592482 | 0.306763  | -0.925248 |
| C | -1.835582 | 0.33953   | -1.313566 |
| C | -3.003661 | -0.012047 | -0.479538 |
| C | -2.873058 | -0.334785 | 0.875982  |
| C | -4.27302  | -0.018698 | -1.062229 |
| C | -3.992343 | -0.661098 | 1.627936  |



|   |           |           |           |
|---|-----------|-----------|-----------|
| H | -1.891278 | -0.322126 | 1.337698  |
| C | -5.393874 | -0.346735 | -0.306011 |
| H | -4.377874 | 0.234657  | -2.111774 |
| C | -5.256818 | -0.669261 | 1.039672  |
| H | -3.881138 | -0.907392 | 2.677549  |
| H | -6.373588 | -0.348483 | -0.769417 |
| H | -6.129135 | -0.923449 | 1.630302  |
| H | -2.039544 | 0.650121  | -2.337751 |
| H | 1.081851  | -1.807945 | -1.124197 |
| O | 4.588639  | 0.129937  | 0.658557  |
| O | 3.722019  | -1.78294  | -0.252041 |
| C | 4.937136  | -1.157735 | 0.13901   |
| H | 5.58456   | -1.025453 | -0.729555 |
| H | 5.412407  | -1.74166  | 0.923701  |

|                                               |                             |
|-----------------------------------------------|-----------------------------|
| Zero-point correction =                       | 0.212380 (Hartree/Particle) |
| Thermal correction to Energy =                | 0.228965                    |
| Thermal correction to Enthalpy =              | 0.229988                    |
| Thermal correction to Gibbs Free Energy =     | 0.163071                    |
| Sum of electronic and zero-point Energies =   | -802.890048                 |
| Sum of electronic and thermal Energies =      | -802.873463                 |
| Sum of electronic and thermal Enthalpies =    | -802.872439                 |
| Sum of electronic and thermal Free Energies = | -802.939357                 |
| SCF Done: E(RM062X) =                         | -803.102427686 A.U.         |

#### 4f

|   |           |           |           |
|---|-----------|-----------|-----------|
| C | -2.553409 | -1.497061 | 0.000015  |
| C | -1.161271 | -1.373246 | 0.000019  |
| C | -0.56937  | -0.109573 | -0.000005 |
| C | -1.3949   | 1.037859  | -0.000028 |
| C | -2.767453 | 0.924219  | -0.000026 |
| C | -3.35631  | -0.368807 | -0.000011 |
| H | -2.975806 | -2.49236  | 0.000042  |
| H | -0.918664 | 2.008892  | -0.000056 |
| O | -0.442104 | -2.520016 | 0.000071  |
| H | 0.502109  | -2.307638 | 0.000106  |
| C | 0.851577  | -0.006293 | 0.000006  |
| C | 2.061142  | 0.018883  | 0.000004  |
| C | 3.491214  | 0.060753  | -0.000002 |
| C | 4.164171  | 1.290707  | 0.0001    |
| C | 4.231172  | -1.130092 | -0.000107 |
| C | 5.552191  | 1.323006  | 0.000097  |
| H | 3.591527  | 2.210454  | 0.00018   |

|   |           |           |           |
|---|-----------|-----------|-----------|
| C | 5.618743  | -1.0867   | -0.000106 |
| H | 3.710554  | -2.080493 | -0.000189 |
| C | 6.282833  | 0.137392  | -0.000004 |
| H | 6.065306  | 2.277448  | 0.000177  |
| H | 6.183474  | -2.01155  | -0.000185 |
| H | 7.366031  | 0.167168  | -0.000003 |
| O | -4.701147 | -0.392213 | -0.00002  |
| O | -3.640424 | 1.961657  | -0.000031 |
| C | -3.084531 | 3.265566  | -0.000037 |
| H | -2.476845 | 3.436573  | 0.893943  |
| H | -2.476758 | 3.436544  | -0.893966 |
| H | -3.929003 | 3.951623  | -0.000064 |
| C | -5.336362 | -1.66362  | 0.000036  |
| H | -5.072142 | -2.234439 | -0.894498 |
| H | -5.072042 | -2.234413 | 0.894553  |
| H | -6.404962 | -1.461193 | 0.000093  |

|                                               |                             |
|-----------------------------------------------|-----------------------------|
| Zero-point correction =                       | 0.262915 (Hartree/Particle) |
| Thermal correction to Energy =                | 0.282958                    |
| Thermal correction to Enthalpy =              | 0.283982                    |
| Thermal correction to Gibbs Free Energy =     | 0.210052                    |
| Sum of electronic and zero-point Energies =   | -843.355943                 |
| Sum of electronic and thermal Energies =      | -843.335900                 |
| Sum of electronic and thermal Enthalpies =    | -843.334876                 |
| Sum of electronic and thermal Free Energies = | -843.408806                 |
| SCF Done: E(RM062X) =                         | -843.618858062 A.U.         |

#### IM2 for substrate 4f

|   |           |           |           |
|---|-----------|-----------|-----------|
| C | -0.986479 | -1.531287 | -0.405307 |
| C | -0.388323 | -0.16604  | -0.635641 |
| C | -1.206822 | 1.028633  | -0.449803 |
| C | -2.494143 | 0.923049  | -0.071794 |
| C | -3.094773 | -0.405753 | 0.161239  |
| C | -2.380674 | -1.548718 | 0.002746  |
| H | -2.817288 | -2.523474 | 0.170779  |
| O | -0.335592 | -2.552296 | -0.552653 |
| C | 0.8772    | -0.093846 | -0.999567 |
| C | 2.128859  | -0.046119 | -1.359125 |
| C | 3.282355  | 0.027015  | -0.437946 |
| C | 3.118277  | 0.038037  | 0.951929  |
| C | 4.572109  | 0.083743  | -0.97119  |
| C | 4.224307  | 0.106449  | 1.786592  |
| H | 2.119777  | -0.011139 | 1.373641  |

|   |           |           |           |
|---|-----------|-----------|-----------|
| C | 5.679864  | 0.152144  | -0.131973 |
| H | 4.703681  | 0.072102  | -2.047847 |
| C | 5.509483  | 0.164232  | 1.248011  |
| H | 4.086013  | 0.113101  | 2.861555  |
| H | 6.675498  | 0.194821  | -0.558049 |
| H | 6.371287  | 0.216314  | 1.902969  |
| H | 2.35416   | -0.063322 | -2.424939 |
| H | -0.74389  | 1.989812  | -0.625058 |
| O | -4.369992 | -0.340237 | 0.530212  |
| O | -3.352524 | 1.937421  | 0.131175  |
| C | -2.848376 | 3.249023  | -0.077298 |
| H | -2.515689 | 3.377692  | -1.111474 |
| H | -3.675096 | 3.924329  | 0.129939  |
| H | -2.019074 | 3.45965   | 0.604295  |
| C | -5.053059 | -1.567384 | 0.777062  |
| H | -4.575226 | -2.115126 | 1.592787  |
| H | -6.065282 | -1.289513 | 1.059068  |
| H | -5.072832 | -2.183421 | -0.125146 |

|                                               |                             |
|-----------------------------------------------|-----------------------------|
| Zero-point correction =                       | 0.262824 (Hartree/Particle) |
| Thermal correction to Energy =                | 0.282408                    |
| Thermal correction to Enthalpy =              | 0.283432                    |
| Thermal correction to Gibbs Free Energy =     | 0.210867                    |
| Sum of electronic and zero-point Energies =   | -843.337692                 |
| Sum of electronic and thermal Energies =      | -843.318108                 |
| Sum of electronic and thermal Enthalpies =    | -843.317084                 |
| Sum of electronic and thermal Free Energies = | -843.389650                 |
| SCF Done: E(RM062X) =                         | -843.600516210 A.U.         |

#### 4g

|   |           |           |           |
|---|-----------|-----------|-----------|
| C | 3.966958  | 1.031343  | -0.000089 |
| C | 3.235301  | -0.164765 | -0.000021 |
| C | 3.917027  | -1.389775 | 0.000039  |
| C | 5.305323  | -1.412994 | 0.000032  |
| C | 6.027715  | -0.222444 | -0.000034 |
| C | 5.354777  | 0.996971  | -0.000094 |
| H | 7.111115  | -0.244725 | -0.000039 |
| H | 5.91315   | 1.92573   | -0.000146 |
| C | 1.805307  | -0.129829 | -0.000011 |
| C | 0.596925  | -0.07223  | -0.000003 |
| C | -0.823941 | -0.088357 | -0.000007 |
| C | -1.581448 | 1.108587  | -0.000005 |
| C | -1.507861 | -1.31161  | -0.000007 |

|   |           |           |           |
|---|-----------|-----------|-----------|
| C | -2.96427  | 1.067652  | 0.000002  |
| C | -2.901345 | -1.368807 | 0         |
| C | -3.615649 | -0.17642  | 0.000007  |
| H | -3.570828 | 1.961795  | 0.000008  |
| H | -3.377414 | -2.338661 | -0.000004 |
| H | 3.351686  | -2.314315 | 0.000093  |
| H | 5.824805  | -2.364032 | 0.000079  |
| O | -0.846979 | -2.486482 | -0.000017 |
| O | -0.858955 | 2.243426  | -0.000011 |
| C | -1.563646 | 3.479065  | 0.000036  |
| H | -2.184218 | 3.57518   | -0.894743 |
| H | -2.184207 | 3.575116  | 0.894829  |
| H | -0.801049 | 4.254616  | 0.000058  |
| O | -4.961904 | -0.112599 | 0.000011  |
| C | -5.687348 | -1.335678 | 0.00011   |
| H | -6.738857 | -1.057518 | 0.00017   |
| H | -5.464997 | -1.923168 | -0.894568 |
| H | -5.464874 | -1.923094 | 0.894805  |
| H | 0.107665  | -2.322726 | 0.000009  |
| H | 3.437786  | 1.976796  | -0.000136 |

|                                               |                             |
|-----------------------------------------------|-----------------------------|
| Zero-point correction =                       | 0.262999 (Hartree/Particle) |
| Thermal correction to Energy =                | 0.282994                    |
| Thermal correction to Enthalpy =              | 0.284018                    |
| Thermal correction to Gibbs Free Energy =     | 0.210395                    |
| Sum of electronic and zero-point Energies =   | -843.364700                 |
| Sum of electronic and thermal Energies =      | -843.344705                 |
| Sum of electronic and thermal Enthalpies =    | -843.343682                 |
| Sum of electronic and thermal Free Energies = | -843.417305                 |
| SCF Done: E(RM062X) =                         | -843.627699859 A.U.         |

#### IM2 for substrate 4g

|   |           |           |           |
|---|-----------|-----------|-----------|
| C | -2.863167 | -0.322071 | 0.964342  |
| C | -3.01919  | -0.145348 | -0.415196 |
| C | -4.306098 | -0.09112  | -0.955016 |
| C | -5.420625 | -0.211211 | -0.130973 |
| C | -5.259096 | -0.3865   | 1.238973  |
| C | -3.976299 | -0.441481 | 1.783401  |
| H | -6.126381 | -0.480476 | 1.881877  |
| H | -3.845413 | -0.579281 | 2.850416  |
| C | -1.859003 | -0.015104 | -1.31948  |
| C | -0.611207 | -0.031494 | -0.950988 |
| C | 0.651032  | -0.082656 | -0.580859 |

|   |           |           |           |
|---|-----------|-----------|-----------|
| C | 1.380252  | 1.137126  | -0.202518 |
| C | 1.355115  | -1.422484 | -0.536825 |
| C | 2.67227   | 1.064007  | 0.182438  |
| C | 2.734964  | -1.399114 | -0.110667 |
| C | 3.339004  | -0.222567 | 0.221947  |
| H | 3.252748  | 1.928527  | 0.47116   |
| H | 3.248448  | -2.349185 | -0.073565 |
| H | -4.429282 | 0.045527  | -2.023992 |
| H | -6.414466 | -0.168122 | -0.561054 |
| O | 0.764892  | -2.445073 | -0.848719 |
| O | 0.648279  | 2.252558  | -0.280222 |
| C | 1.284294  | 3.477429  | 0.072656  |
| H | 1.618926  | 3.451307  | 1.112735  |
| H | 2.133415  | 3.674284  | -0.586829 |
| H | 0.530949  | 4.250881  | -0.053995 |
| O | 4.609102  | -0.110531 | 0.623066  |
| C | 5.393658  | -1.297453 | 0.708108  |
| H | 6.376163  | -0.978863 | 1.047447  |
| H | 4.960192  | -1.995068 | 1.4286    |
| H | 5.475847  | -1.775629 | -0.270756 |
| H | -2.068494 | 0.107716  | -2.381242 |
| H | -1.866271 | -0.367004 | 1.390135  |

|                                               |                             |
|-----------------------------------------------|-----------------------------|
| Zero-point correction =                       | 0.262527 (Hartree/Particle) |
| Thermal correction to Energy =                | 0.282195                    |
| Thermal correction to Enthalpy =              | 0.283218                    |
| Thermal correction to Gibbs Free Energy =     | 0.210257                    |
| Sum of electronic and zero-point Energies =   | -843.345170                 |
| Sum of electronic and thermal Energies =      | -843.325502                 |
| Sum of electronic and thermal Enthalpies =    | -843.324478                 |
| Sum of electronic and thermal Free Energies = | -843.397439                 |
| SCF Done: E(RM062X) =                         | -843.607696271 A.U.         |

#### 4h

|   |          |           |           |
|---|----------|-----------|-----------|
| C | 3.018335 | 1.207199  | 0.000109  |
| C | 1.63619  | 1.123633  | 0.0001    |
| C | 0.998091 | -0.136295 | -0.000022 |
| C | 1.793427 | -1.286077 | -0.000129 |
| C | 3.177717 | -1.214889 | -0.00012  |
| C | 3.791022 | 0.044712  | -0.000003 |
| H | 3.502402 | 2.175831  | 0.00021   |
| H | 1.306023 | -2.253693 | -0.00022  |
| O | 0.935062 | 2.276488  | 0.000218  |

|   |           |           |           |
|---|-----------|-----------|-----------|
| H | -0.012986 | 2.079688  | 0.000246  |
| C | -0.426152 | -0.19191  | -0.000031 |
| C | -1.635565 | -0.177111 | -0.000029 |
| C | -3.066428 | -0.176056 | -0.000024 |
| C | -3.773831 | -1.386291 | 0.000209  |
| C | -3.771293 | 1.035695  | -0.000247 |
| C | -5.16216  | -1.37884  | 0.000214  |
| H | -3.227407 | -2.32183  | 0.000384  |
| C | -5.159594 | 1.032042  | -0.000233 |
| H | -3.223518 | 1.970712  | -0.000432 |
| C | -5.858264 | -0.172621 | -0.000004 |
| H | -5.702622 | -2.318052 | 0.000395  |
| H | -5.697689 | 1.972605  | -0.000406 |
| H | -6.94189  | -0.171392 | 0.000005  |
| O | 5.126191  | 0.235631  | 0.000021  |
| H | 3.760254  | -2.12529  | -0.00021  |
| C | 5.965101  | -0.912163 | -0.000064 |
| H | 5.801415  | -1.518839 | 0.894543  |
| H | 5.801424  | -1.518697 | -0.894769 |
| H | 6.985008  | -0.534171 | -0.000024 |

Zero-point correction = 0.229954 (Hartree/Particle)  
Thermal correction to Energy = 0.246987  
Thermal correction to Enthalpy = 0.248010  
Thermal correction to Gibbs Free Energy = 0.181082  
Sum of electronic and zero-point Energies = -728.884422  
Sum of electronic and thermal Energies = -728.867389  
Sum of electronic and thermal Enthalpies = -728.866366  
Sum of electronic and thermal Free Energies = -728.933294  
SCF Done: E(RM062X) = -729.114375561 A.U.

#### IM2 for substrate 4h

|   |           |           |           |
|---|-----------|-----------|-----------|
| C | 1.445194  | 1.317177  | 0.366893  |
| C | 0.793137  | 0.304289  | -0.544536 |
| C | 1.566462  | -0.831027 | -1.032148 |
| C | 2.854083  | -0.993677 | -0.687471 |
| C | 3.49824   | -0.022325 | 0.189995  |
| C | 2.831896  | 1.058991  | 0.681403  |
| H | 3.34532   | 1.75746   | 1.330767  |
| O | 0.824857  | 2.278082  | 0.797568  |
| C | -0.47349  | 0.463069  | -0.880411 |
| C | -1.722671 | 0.634023  | -1.202755 |
| C | -2.881416 | 0.113336  | -0.448459 |

|   |           |           |           |
|---|-----------|-----------|-----------|
| C | -2.727265 | -0.558201 | 0.769681  |
| C | -4.164518 | 0.301814  | -0.96667  |
| C | -3.838638 | -1.034315 | 1.449821  |
| H | -1.734163 | -0.698771 | 1.183429  |
| C | -5.277108 | -0.176833 | -0.282072 |
| H | -4.287176 | 0.825349  | -1.908625 |
| C | -5.117453 | -0.84617  | 0.926201  |
| H | -3.709633 | -1.551165 | 2.393645  |
| H | -6.268026 | -0.024518 | -0.693666 |
| H | -5.983404 | -1.217965 | 1.461208  |
| H | -1.934777 | 1.208827  | -2.103628 |
| H | 1.071473  | -1.541524 | -1.683444 |
| O | 4.781762  | -0.161273 | 0.548082  |
| H | 3.412697  | -1.841093 | -1.05919  |
| C | 5.54206   | -1.269444 | 0.066574  |
| H | 5.117053  | -2.215955 | 0.406676  |
| H | 5.612626  | -1.254567 | -1.02295  |
| H | 6.533983  | -1.144807 | 0.494293  |

|                                               |                             |
|-----------------------------------------------|-----------------------------|
| Zero-point correction =                       | 0.229044 (Hartree/Particle) |
| Thermal correction to Energy =                | 0.245994                    |
| Thermal correction to Enthalpy =              | 0.247017                    |
| Thermal correction to Gibbs Free Energy =     | 0.179933                    |
| Sum of electronic and zero-point Energies =   | -728.856861                 |
| Sum of electronic and thermal Energies =      | -728.839912                 |
| Sum of electronic and thermal Enthalpies =    | -728.838889                 |
| Sum of electronic and thermal Free Energies = | -728.905973                 |
| SCF Done: E(RM062X) =                         | -729.085905610 A.U.         |

#### 4i

|   |           |           |           |
|---|-----------|-----------|-----------|
| C | -3.102517 | 1.383024  | 0.000053  |
| C | -1.713789 | 1.279273  | 0.000091  |
| C | -1.114    | 0.011197  | 0.000071  |
| C | -1.93708  | -1.126537 | 0.000027  |
| C | -3.319161 | -1.030242 | -0.000005 |
| C | -3.909364 | 0.251864  | 0.000001  |
| H | -3.542891 | 2.374079  | 0.000072  |
| H | -1.464329 | -2.102726 | 0.000014  |
| O | -0.992842 | 2.423501  | 0.000146  |
| H | -0.048489 | 2.211576  | 0.000168  |
| C | 0.309621  | -0.08481  | 0.000111  |
| C | 1.518742  | -0.10626  | 0.000118  |
| C | 2.94921   | -0.146199 | 0.000011  |
| C | 3.622371  | -1.375855 | -0.000189 |

|   |           |           |           |
|---|-----------|-----------|-----------|
| C | 3.687409  | 1.045401  | 0.000116  |
| C | 5.010396  | -1.407138 | -0.000282 |
| H | 3.050029  | -2.295768 | -0.000268 |
| C | 5.075016  | 1.003104  | 0.00002   |
| H | 3.165727  | 1.995189  | 0.000275  |
| C | 5.739651  | -0.220675 | -0.00018  |
| H | 5.524467  | -2.361023 | -0.000438 |
| H | 5.639243  | 1.928215  | 0.000102  |
| H | 6.822886  | -0.249574 | -0.000254 |
| C | -4.177449 | -2.267114 | -0.000005 |
| H | -4.826719 | -2.299398 | 0.879875  |
| H | -4.827102 | -2.299153 | -0.879605 |
| H | -3.560082 | -3.16598  | -0.000252 |
| C | -5.406101 | 0.39303   | -0.000058 |
| H | -5.843467 | -0.088888 | -0.879367 |
| H | -5.843609 | -0.089388 | 0.8789    |
| H | -5.700664 | 1.442458  | 0.000207  |

|                                               |                             |
|-----------------------------------------------|-----------------------------|
| Zero-point correction =                       | 0.252157 (Hartree/Particle) |
| Thermal correction to Energy =                | 0.270128                    |
| Thermal correction to Enthalpy =              | 0.271151                    |
| Thermal correction to Gibbs Free Energy =     | 0.202508                    |
| Sum of electronic and zero-point Energies =   | -692.965153                 |
| Sum of electronic and thermal Energies =      | -692.947182                 |
| Sum of electronic and thermal Enthalpies =    | -692.946158                 |
| Sum of electronic and thermal Free Energies = | -693.014802                 |
| SCF Done: E(RM062X) =                         | -693.217309819 A.U.         |

#### IM2 for substrate 4i

|   |           |           |           |
|---|-----------|-----------|-----------|
| C | 1.529388  | 1.475636  | -0.02298  |
| C | 0.910563  | 0.206868  | -0.543155 |
| C | 1.709953  | -1.013531 | -0.589674 |
| C | 2.99095   | -1.04043  | -0.177523 |
| C | 3.613154  | 0.193723  | 0.335388  |
| C | 2.920753  | 1.353175  | 0.401474  |
| H | 3.384066  | 2.258318  | 0.77972   |
| O | 0.912293  | 2.525241  | 0.038019  |
| C | -0.348555 | 0.228204  | -0.940074 |
| C | -1.590551 | 0.260437  | -1.329803 |
| C | -2.765657 | 0.001218  | -0.472211 |
| C | -2.637084 | -0.262411 | 0.896218  |
| C | -4.03861  | 0.019127  | -1.046621 |
| C | -3.762736 | -0.506485 | 1.669472  |



|   |           |           |           |
|---|-----------|-----------|-----------|
| H | -1.651886 | -0.271466 | 1.35069   |
| C | -5.16575  | -0.226087 | -0.268554 |
| H | -4.14193  | 0.226139  | -2.106384 |
| C | -5.031152 | -0.490253 | 1.089947  |
| H | -3.65303  | -0.709025 | 2.728533  |
| H | -6.148326 | -0.209761 | -0.725543 |
| H | -5.908173 | -0.681454 | 1.697088  |
| H | -1.785205 | 0.495697  | -2.375611 |
| H | 1.23263   | -1.909952 | -0.97078  |
| C | 3.802769  | -2.304665 | -0.226932 |
| H | 4.693011  | -2.179141 | -0.849284 |
| H | 4.144443  | -2.593961 | 0.770929  |
| H | 3.209359  | -3.122148 | -0.636843 |
| C | 5.04384   | 0.133889  | 0.783051  |
| H | 5.168203  | -0.605117 | 1.579576  |
| H | 5.691893  | -0.174659 | -0.042408 |
| H | 5.378966  | 1.104116  | 1.148026  |

Zero-point correction = 0.251532 (Hartree/Particle)  
 Thermal correction to Energy = 0.269225  
 Thermal correction to Enthalpy = 0.270248  
 Thermal correction to Gibbs Free Energy = 0.201820  
 Sum of electronic and zero-point Energies = -692.938538  
 Sum of electronic and thermal Energies = -692.920845  
 Sum of electronic and thermal Enthalpies = -692.919822  
 Sum of electronic and thermal Free Energies = -692.988250  
 SCF Done: E(RM062X) = ..... -693.190070319 A.U.

9. Figure S1 Steric selectivity of the addition of S-anion to allene moiety

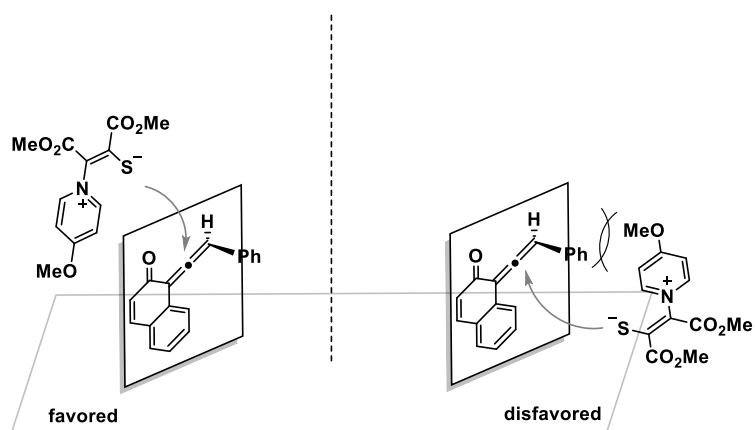

The transition state TS2 for nucleophilic addition of S-anion to allene moiety is the rate-determining transition state. As shown in Figure S1, steric hindrance makes reaction attacked from phenyl side (transition state TS2') less favorable.

## 10. Characterization Data

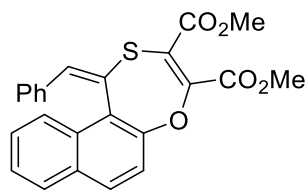

Dimethyl (*E*)-1-benzylidene-1*H*-naphtho[1,2-*f*][1,4]oxathiepine-3,4-dicarboxylate. Compound **3a** (41 mg, Yield = 98%,  $R_f = 0.25$  (PE/EA = 5:1)) was isolated as a colorless oil.  $^1\text{H}$  NMR (400 MHz,  $(\text{CD}_3)_2\text{CO}$ )  $\delta$  8.09 (d,  $J = 9.2$  Hz, 1H), 7.96 (d,  $J = 8.0$  Hz, 1H), 7.65–7.60 (m, 2H), 7.58 (s, 1H), 7.47–7.41 (m, 1H), 7.36–7.31 (m, 1H), 7.13–6.96 (m, 5H), 3.88 (s, 3H), 3.74 (s, 3H);  $^{13}\text{C}$  NMR (100 MHz,  $(\text{CD}_3)_2\text{CO}$ )  $\delta$  164.6, 162.8, 155.1, 141.6, 139.9, 135.7, 133.0, 132.3, 130.8, 129.6, 129.5, 129.4, 129.1, 129.0, 128.9, 128.4, 127.0, 125.4, 123.2, 121.5, 53.6, 53.3; ESI-HRMS  $m/z$  calcd for  $\text{C}_{24}\text{H}_{19}\text{O}_5\text{S}$  [ $\text{M} + \text{H}$ ] $^+$  419.0948, found 419.0944.

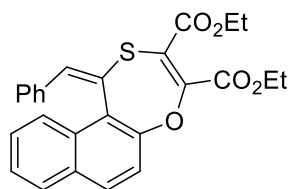

Diethyl (*E*)-1-benzylidene-1*H*-naphtho[1,2-*f*][1,4]oxathiepine-3,4-dicarboxylate. Compound **3b** (44 mg, Yield = 98%,  $R_f = 0.12$  (PE/EA = 10:1)) was isolated as a colorless oil.  $^1\text{H}$  NMR (400 MHz,  $(\text{CD}_3)_2\text{CO}$ )  $\delta$  8.10 (d,  $J = 9.2$  Hz, 1H), 7.98 (d,  $J = 8.4$  Hz, 1H), 7.66–7.60 (m, 2H), 7.58 (s, 1H), 7.48–7.43 (m, 1H), 7.38–7.32 (m, 1H), 7.12–7.01 (m, 3H), 7.00–6.96 (m, 2H), 4.40–4.26 (m, 2H), 4.20 (q,  $J = 7.2$  Hz, 2H), 1.38 (t,  $J = 7.2$  Hz, 3H), 1.22 (t,  $J = 7.2$  Hz, 3H);  $^{13}\text{C}$  NMR (100 MHz,  $(\text{CD}_3)_2\text{CO}$ )  $\delta$  164.0, 162.3, 155.2, 141.8, 139.7, 135.7, 132.9, 132.3, 130.6, 129.6, 129.5, 129.3, 129.1, 129.0 (2C), 128.3, 126.9, 125.4, 123.4, 121.5, 63.1, 62.7, 14.4, 14.0; ESI-HRMS  $m/z$  calcd for  $\text{C}_{26}\text{H}_{23}\text{O}_5\text{S}$  [ $\text{M} + \text{H}$ ] $^+$  447.1261, found 447.1260.

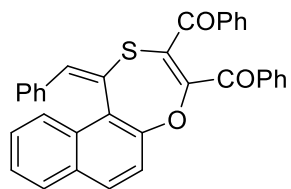

(*E*)-(1-Benzylidene-1*H*-naphtho[1,2-*f*][1,4]oxathiepine-3,4-diyl)bis(phenylmethanone). Compound **3c** (50 mg, Yield = 98%,  $R_f = 0.17$  (PE/EA = 10:1)) was isolated as a yellow solid; mp 178–179 °C.  $^1\text{H}$  NMR (400 MHz,  $\text{CDCl}_3$ )  $\delta$  8.01–7.97 (m, 2H), 7.89–7.86 (m, 2H), 7.83 (d,  $J = 8.4$  Hz, 1H), 7.79 (d,  $J = 9.2$  Hz, 1H), 7.64–7.56 (m, 2H), 7.52–7.44 (m, 4H), 7.43–7.33 (m, 3H), 7.32–7.27 (m, 1H), 7.12–7.07 (m, 1H), 7.06–7.00 (m, 2H), 6.97–6.93 (m, 2H), 6.91 (d,  $J = 8.8$  Hz, 1H);  $^{13}\text{C}$  NMR (100 MHz,  $\text{CDCl}_3$ )  $\delta$  189.2, 187.8, 154.0, 144.9, 139.9, 138.8, 136.5, 135.6, 134.6, 133.6, 132.9, 131.9, 131.4,

130.1, 129.0, 128.8, 128.7, 128.6, 128.4, 128.3, 127.5, 126.1, 125.0, 123.5, 120.4, (3C peak is merged with other peaks); ESI-HRMS  $m/z$  calcd for  $C_{34}H_{23}O_3S$   $[M + H]^+$  511.1362, found 511.1364.

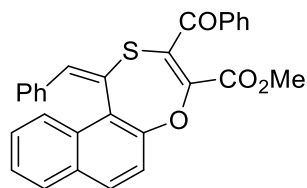

Methyl (*E*)-3-benzoyl-1-benzylidene-1*H*-naphtho[1,2-*f*][1,4]oxathiepine-4-carboxylate. Compound **3d** (46 mg, Yield = 99%,  $R_f$  = 0.18 (PE/EA = 10:1)) was isolated as a colorless oil.  $^1H$  NMR (400 MHz,  $(CD_3)_2CO$ )  $\delta$  8.15 (d,  $J$  = 8.8 Hz, 1H), 8.01 (d,  $J$  = 8.4 Hz, 1H), 7.85–7.81 (m, 2H), 7.70–7.59 (m, 4H), 7.50–7.44 (m, 3H), 7.38–7.32 (m, 1H), 7.14–6.99 (m, 5H), 3.66 (s, 3H);  $^{13}C$  NMR (100 MHz,  $(CD_3)_2CO$ )  $\delta$  188.6, 162.5, 155.4, 139.9, 139.4, 137.9, 136.3, 135.7, 134.6, 133.0, 132.5, 129.7, 129.6 (2C), 129.4, 129.2, 129.1, 129.0, 128.4, 127.0, 125.4, 123.6, 121.5, 52.8, (1C peak is merged with other peaks); ESI-HRMS  $m/z$  calcd for  $C_{29}H_{21}O_4S$   $[M + H]^+$  465.1155, found 465.1152.

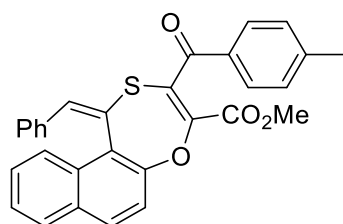

Methyl (*E*)-1-benzylidene-3-(4-methylbenzoyl)-1*H*-naphtho[1,2-*f*][1,4]oxathiepine-4-carboxylate. Compound **3e** (46 mg, Yield = 96%,  $R_f$  = 0.12 (PE/EA = 10:1)) was isolated as a colorless oil.  $^1H$  NMR (400 MHz,  $(CD_3)_2CO$ )  $\delta$  8.14 (d,  $J$  = 8.4 Hz, 1H), 8.01 (d,  $J$  = 8.8 Hz, 1H), 7.72–7.62 (m, 4H), 7.58 (s, 1H), 7.49–7.44 (m, 1H), 7.37–7.31 (m, 1H), 7.28–7.24 (m, 2H), 7.14–6.99 (m, 5H), 3.66 (s, 3H), 2.36 (s, 3H);  $^{13}C$  NMR (100 MHz,  $(CD_3)_2CO$ )  $\delta$  188.2, 162.5, 155.4, 145.7, 139.7, 139.6, 137.8, 135.8, 133.8, 133.0, 132.4, 130.3, 129.9, 129.6, 129.6, 129.4, 129.2, 129.1, 128.9, 128.3, 126.9, 125.4, 123.8, 121.5, 52.7, 21.6; ESI-HRMS  $m/z$  calcd for  $C_{30}H_{23}O_4S$   $[M + H]^+$  479.1312, found 479.1318.

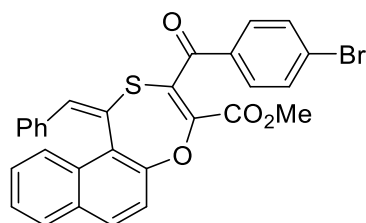

Methyl (*E*)-1-benzylidene-3-(4-bromobenzoyl)-1*H*-naphtho[1,2-*f*][1,4]oxathiepine-4-carboxylate. Compound **3f** (53 mg, Yield = 97%,  $R_f$  = 0.26 (PE/EA = 10:1)) was isolated as a yellow oil.  $^1H$  NMR (400 MHz,  $(CD_3)_2CO$ )  $\delta$  8.13 (d,  $J$  = 9.2 Hz, 1H), 8.00 (d,  $J$  = 8.4 Hz, 1H), 7.80–7.75 (m, 2H), 7.70–7.63 (m, 4H), 7.61 (s, 1H), 7.49–7.43 (m, 1H), 7.37–7.31 (m, 1H), 7.14–6.99 (m, 5H), 3.70 (s, 3H);  $^{13}C$  NMR (100 MHz,  $(CD_3)_2CO$ )  $\delta$  187.8, 162.6, 155.2, 140.2, 138.9, 137.8, 135.7, 135.3, 133.0, 132.5,

131.4, 129.6 (2C), 129.5, 129.2, 129.0, 128.4, 127.0, 125.4, 123.3, 121.5, 53.0, (3C peak is merged with other peaks); ESI-HRMS  $m/z$  calcd for  $C_{29}H_{20}BrO_4S$   $[M + H]^+$  543.0260, found 543.0264.

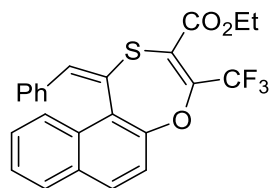

Ethyl (E)-1-benzylidene-4-(trifluoromethyl)-1H-naphtho[1,2-f][1,4]oxathiepine-3-carboxylate. Compound **3g** (41 mg, Yield = 93%,  $R_f$  = 0.49 (PE/EA = 10:1)) was isolated as a yellow oil.  $^1H$  NMR (400 MHz,  $CDCl_3$ )  $\delta$  7.93 (d,  $J$  = 8.8 Hz, 1H), 7.86 (d,  $J$  = 8.8 Hz, 1H), 7.59 (d,  $J$  = 9.2 Hz, 1H), 7.48 (s, 1H), 7.45–7.39 (m, 2H), 7.34–7.28 (m, 1H), 7.10–7.04 (m, 1H), 7.03–6.97 (m, 2H), 6.91–6.85 (m, 2H), 4.29–4.20 (m, 2H), 1.29 (t,  $J$  = 7.2 Hz, 3H);  $^{13}C$  NMR (100 MHz,  $CDCl_3$ )  $\delta$  162.8, 153.6, 139.9, 137.4 (q,  $J$  = 36.2 Hz), 134.5, 132.0, 131.3, 129.0, 128.7, 128.6, 128.5, 128.4, 128.2, 127.7, 126.3, 125.3 (q,  $J$  = 2.9 Hz), 124.8, 121.9, 120.5, 120.1 (q,  $J$  = 272.9 Hz), 63.2, 13.8;  $^{19}F$  NMR (376 MHz,  $CDCl_3$ )  $\delta$  -66.9 (s, 1F); ESI-HRMS  $m/z$  calcd for  $C_{24}H_{18}F_3O_3S$   $[M + H]^+$  443.0923, found 443.0926.

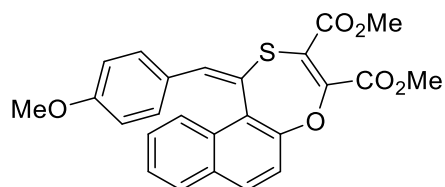

Dimethyl (E)-1-(4-methoxybenzylidene)-1H-naphtho[1,2-f][1,4]oxathiepine-3,4-dicarboxylate. Compound **3h** (42 mg, Yield = 94%,  $R_f$  = 0.22 (PE/EA = 5:1)) was isolated as a yellow oil.  $^1H$  NMR (400 MHz,  $(CD_3)_2CO$ )  $\delta$  8.10 (d,  $J$  = 8.8 Hz, 1H), 8.02–7.98 (m, 1H), 7.68–7.64 (m, 1H), 7.60 (d,  $J$  = 8.8 Hz, 1H), 7.51–7.45 (m, 2H), 7.41–7.36 (m, 1H), 6.94–6.89 (m, 2H), 6.63–6.58 (m, 2H), 3.88 (s, 3H), 3.73 (s, 3H), 3.65 (s, 3H);  $^{13}C$  NMR (100 MHz,  $(CD_3)_2CO$ )  $\delta$  164.7, 162.9, 160.8, 154.9, 141.3, 139.8, 133.0, 132.1, 131.3, 131.1, 129.6, 129.3, 129.2, 128.4, 128.2, 127.0, 125.5, 121.6, 119.7, 114.6, 55.4, 53.6, 53.2; ESI-HRMS  $m/z$  calcd for  $C_{25}H_{21}O_6S$   $[M + H]^+$  449.1053, found 449.1052.

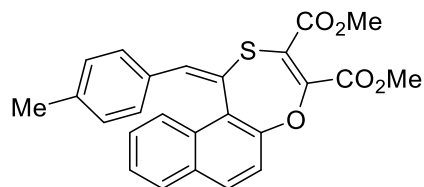

Dimethyl (E)-1-(4-methylbenzylidene)-1H-naphtho[1,2-f][1,4]oxathiepine-3,4-dicarboxylate. Compound **3i** (41 mg, Yield = 95%,  $R_f$  = 0.28 (PE/EA = 5:1)) was isolated as a yellow oil.  $^1H$  NMR (400 MHz,  $(CD_3)_2CO$ )  $\delta$  8.10 (d,  $J$  = 8.8 Hz, 1H), 7.99 (d,  $J$  = 8.0 Hz, 1H), 7.66–7.63 (m, 1H), 7.60 (d,  $J$  = 8.8 Hz, 1H), 7.53 (s, 1H), 7.49–7.44 (m, 1H), 7.40–7.34 (m, 1H), 6.86 (s, 4H), 3.88 (s, 3H), 3.73 (s, 3H), 2.13 (s, 3H);  $^{13}C$  NMR (100 MHz,  $(CD_3)_2CO$ )  $\delta$  164.6, 162.8, 155.0, 141.5, 140.0, 139.5, 133.0,

132.9, 132.2, 130.9, 129.8, 129.7, 129.6, 129.2, 129.1, 128.4, 127.0, 125.4, 121.8, 121.5, 53.6, 53.2, 21.1; ESI-HRMS  $m/z$  calcd for  $C_{25}H_{21}O_5S$   $[M + H]^+$  433.1104, found 433.1107.

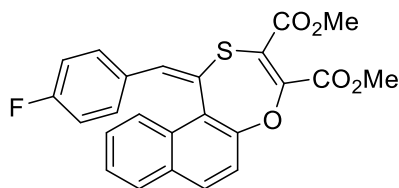

Dimethyl (E)-1-(4-fluorobenzylidene)-1H-naphtho[1,2-f][1,4]oxathiepine-3,4-dicarboxylate. Compound **3j** (43 mg, Yield = 98%,  $R_f$  = 0.14 (PE/EA = 10:1)) was isolated as a yellow oil.  $^1H$  NMR (400 MHz,  $CDCl_3$ )  $\delta$  7.91 (d,  $J$  = 8.8 Hz, 1H), 7.84 (d,  $J$  = 8.4 Hz, 1H), 7.56–7.50 (m, 2H), 7.43–7.38 (m, 2H), 7.33–7.28 (m, 1H), 6.89–6.83 (m, 2H), 6.71–6.64 (s, 2H), 3.90 (s, 3H), 3.80 (s, 3H);  $^{13}C$  NMR (100 MHz,  $CDCl_3$ )  $\delta$  164.4, 162.5 (d,  $J$  = 248.8 Hz), 162.4, 154.1, 139.9, 138.0, 132.0, 131.4, 130.9 (d,  $J$  = 3.3 Hz), 130.7 (d,  $J$  = 8.6 Hz), 128.7, 128.2, 128.0, 127.6, 126.2, 124.7, 122.3 (2C), 120.9, 115.5 (d,  $J$  = 21.5 Hz), 53.6, 53.1;  $^{19}F$  NMR (376 MHz,  $CDCl_3$ )  $\delta$  -111.6 (s, 1F); ESI-HRMS  $m/z$  calcd for  $C_{24}H_{18}FO_5S$   $[M + H]^+$  437.0853, found 437.0853.

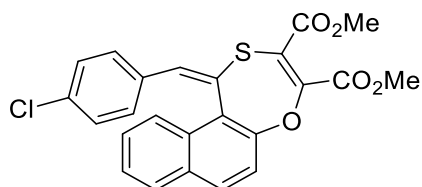

Dimethyl (E)-1-(4-chlorobenzylidene)-1H-naphtho[1,2-f][1,4]oxathiepine-3,4-dicarboxylate. Compound **3k** (43 mg, Yield = 95%,  $R_f$  = 0.16 (PE/EA = 10:1)) was isolated as a yellow solid; mp 79–80 °C.  $^1H$  NMR (400 MHz,  $(CD_3)_2CO$ )  $\delta$  8.11 (d,  $J$  = 9.2 Hz, 1H), 7.98 (d,  $J$  = 8.4 Hz, 1H), 7.61 (d,  $J$  = 8.8 Hz, 2H), 7.57 (s, 1H), 7.49–7.43 (m, 1H), 7.40–7.34 (m, 1H), 7.10–7.05 (m, 2H), 7.00–6.95 (m, 2H), 3.89 (s, 3H), 3.73 (s, 3H);  $^{13}C$  NMR (100 MHz,  $(CD_3)_2CO$ )  $\delta$  164.5, 162.8, 155.3, 141.8, 138.3, 134.6, 134.5, 133.0, 132.5, 131.1, 130.6, 129.6, 129.3, 128.8, 128.5, 128.4, 127.1, 125.2, 124.4, 121.5, 53.7, 53.3; ESI-HRMS  $m/z$  calcd for  $C_{24}H_{18}ClO_5S$   $[M + H]^+$  453.0558, found 453.0564.

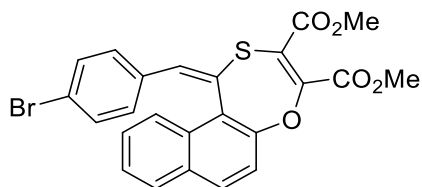

Dimethyl (E)-1-(4-bromobenzylidene)-1H-naphtho[1,2-f][1,4]oxathiepine-3,4-dicarboxylate. Compound **3l** (48 mg, Yield = 97%,  $R_f$  = 0.34 (PE/EA = 5:1)) was isolated as a yellow solid; mp 82–83 °C.  $^1H$  NMR (400 MHz,  $(CD_3)_2CO$ )  $\delta$  8.10 (d,  $J$  = 8.8 Hz, 1H), 7.98 (d,  $J$  = 8.0 Hz, 1H), 7.61 (d,  $J$  = 8.8 Hz, 2H), 7.55 (s, 1H), 7.49–7.43 (m, 1H), 7.39–7.34 (m, 1H), 7.25–7.20 (m, 2H), 6.93–6.88 (m, 2H), 3.89 (s, 3H), 3.73 (s, 3H);  $^{13}C$  NMR (100 MHz,  $(CD_3)_2CO$ )  $\delta$  164.5, 162.8, 155.3, 141.8, 138.4,

134.9, 133.0, 132.5, 132.3, 131.3, 130.6, 129.6, 128.8, 128.5, 128.4, 127.1, 125.2, 124.6, 123.0, 121.5, 53.7, 53.3. ESI-HRMS  $m/z$  calcd for  $C_{24}H_{18}BrO_5S$   $[M + H]^+$  497.0053, found 497.0060.

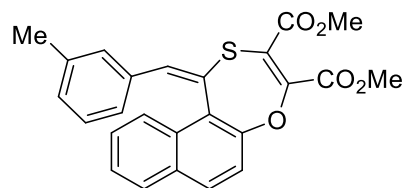

Dimethyl (E)-1-(3-methylbenzylidene)-1H-naphtho[1,2-f][1,4]oxathiepine-3,4-dicarboxylate. Compound **3m** (42 mg, Yield = 97%,  $R_f$  = 0.35 (PE/EA = 5:1)) was isolated as a yellow oil.  $^1H$  NMR (400 MHz,  $(CD_3)_2CO$ )  $\delta$  8.10 (d,  $J$  = 8.8 Hz, 1H), 7.98 (d,  $J$  = 8.4 Hz, 1H), 7.65–7.59 (m, 2H), 7.53 (s, 1H), 7.48–7.43 (m, 1H), 7.38–7.32 (m, 1H), 6.93–6.83 (m, 3H), 6.72–6.63 (m, 1H), 3.88 (s, 3H), 3.73 (s, 3H), 2.02 (s, 3H);  $^{13}C$  NMR (100 MHz,  $(CD_3)_2CO$ )  $\delta$  164.6, 162.8, 155.1, 141.6, 140.0, 138.6, 135.6, 132.9, 132.2, 130.9, 130.6, 130.1, 129.5, 129.1, 129.0 (2C), 128.3, 126.9, 126.5, 125.4, 122.9, 121.4, 53.6, 53.2, 21.1. ESI-HRMS  $m/z$  calcd for  $C_{25}H_{21}O_5S$   $[M + H]^+$  433.1104, found 433.1105.

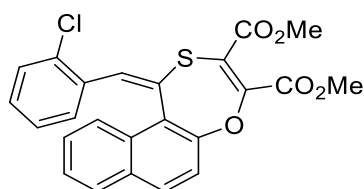

Dimethyl (E)-1-(2-chlorobenzylidene)-1H-naphtho[1,2-f][1,4]oxathiepine-3,4-dicarboxylate. Compound **3n** (44 mg, Yield = 97%,  $R_f$  = 0.11 (PE/EA = 10:1)) was isolated as a white solid; mp 79–80 °C.  $^1H$  NMR (400 MHz,  $CDCl_3$ )  $\delta$  7.86 (d,  $J$  = 8.8 Hz, 1H), 7.76 (d,  $J$  = 8.8 Hz, 1H), 7.66 (s, 1H), 7.57–7.49 (m, 2H), 7.37–7.25 (m, 3H), 6.97–6.91 (m, 1H), 6.67–6.58 (m, 2H), 3.93 (s, 3H), 3.82 (s, 3H);  $^{13}C$  NMR (100 MHz,  $CDCl_3$ )  $\delta$  164.3, 162.3, 154.8, 140.1, 135.6, 133.4, 133.2, 131.9, 131.3, 130.7, 129.8, 129.5, 129.3, 128.4, 128.3, 127.5, 127.4, 126.3, 126.0, 125.7, 124.4, 120.6, 53.6, 53.1. ESI-HRMS  $m/z$  calcd for  $C_{24}H_{18}ClO_5S$   $[M + H]^+$  453.0558, found 453.0558.

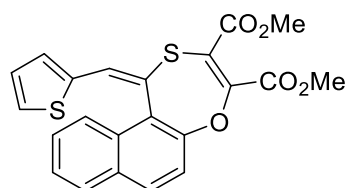

Dimethyl (E)-1-(thiophen-2-ylmethylene)-1H-naphtho[1,2-f][1,4]oxathiepine-3,4-dicarboxylate. Compound **3o** (42 mg, Yield = 99%,  $R_f$  = 0.32 (PE/EA = 5:1)) was isolated as a yellow oil.  $^1H$  NMR (400 MHz,  $(CD_3)_2CO$ )  $\delta$  8.14 (d,  $J$  = 8.0 Hz, 1H), 8.04 (d,  $J$  = 8.4 Hz, 1H), 7.81 (s, 1H), 7.80–7.76 (m, 1H), 7.60 (d,  $J$  = 9.2 Hz, 1H), 7.56–7.51 (m, 1H), 7.50–7.45 (m, 1H), 7.23–7.20 (m, 1H), 7.15–7.12 (m, 1H), 6.89 (dd,  $J$  = 5.2, 4.0 Hz, 1H), 3.86 (s, 3H), 3.73 (s, 3H);  $^{13}C$  NMR (100 MHz,  $(CD_3)_2CO$ )  $\delta$  164.6, 162.8, 155.3, 142.0, 138.2, 133.9, 133.1, 132.6, 132.0, 130.4, 130.2, 130.1, 129.7, 128.6, 128.3, 127.3,

127.1, 125.3, 121.5, 119.4, 53.6, 53.2. ESI-HRMS  $m/z$  calcd for  $C_{22}H_{17}O_5S_2$   $[M + H]^+$  425.0512, found 425.0511.

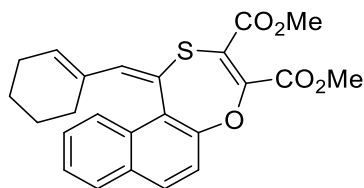

Dimethyl (*E*)-1-(cyclohex-1-en-1-ylmethylene)-1*H*-naphtho[1,2-*f*][1,4]oxathiepine-3,4-dicarboxylate. Compound **3p** (34 mg, Yield = 80%,  $R_f$  = 0.15 (PE/EA = 10:1)) was isolated as a yellow oil.  $^1H$  NMR (400 MHz,  $CDCl_3$ )  $\delta$  7.87–7.82 (m, 2H), 7.79–7.75 (m, 1H), 7.55–7.45 (m, 2H), 7.41 (d,  $J$  = 8.8 Hz, 1H), 6.99 (s, 1H), 5.90 (t,  $J$  = 3.6 Hz, 1H), 3.88 (s, 3H), 3.77 (s, 3H), 2.11–1.92 (m, 2H), 1.55–1.36 (m, 2H), 1.27–1.08 (m, 4H);  $^{13}C$  NMR (100 MHz,  $CDCl_3$ )  $\delta$  164.7, 162.5, 153.0, 144.4, 139.3, 136.5, 135.2, 131.5, 131.3, 130.6, 130.5, 129.6, 128.5, 127.4, 126.0, 125.0, 120.6, 116.8, 53.5, 53.0, 26.3, 25.9, 22.4, 21.5. ESI-HRMS  $m/z$  calcd for  $C_{24}H_{23}O_5S$   $[M + H]^+$  423.1261, found 423.1261.

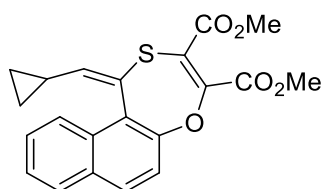

Dimethyl (*E*)-1-(cyclopropylmethylene)-1*H*-naphtho[1,2-*f*][1,4]oxathiepine-3,4-dicarboxylate. Compound **3q** (25 mg, Yield = 65%,  $R_f$  = 0.15 (PE/EA = 10:1)) was isolated as a yellow oil.  $^1H$  NMR (400 MHz,  $CDCl_3$ )  $\delta$  7.94–7.84 (m, 3H), 7.59–7.53 (m, 1H), 7.52–7.45 (m, 2H), 5.91 (d,  $J$  = 10.0 Hz, 1H), 3.89 (s, 3H), 3.77 (s, 3H), 1.14–1.03 (m, 1H), 0.79–0.57 (m, 4H);  $^{13}C$  NMR (100 MHz,  $CDCl_3$ )  $\delta$  164.7, 162.6, 154.4, 146.7, 139.5, 131.8, 131.1, 130.6, 130.0, 128.6, 128.0, 127.3, 125.9, 125.4, 121.0, 117.5, 53.5, 53.0, 13.8, 8.4, 7.6. ESI-HRMS  $m/z$  calcd for  $C_{21}H_{19}O_5S$   $[M + H]^+$  383.0948, found 383.0952.

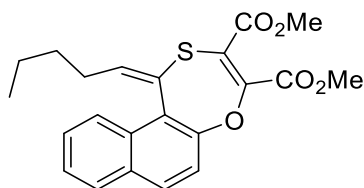

Dimethyl (*E*)-1-pentylidene-1*H*-naphtho[1,2-*f*][1,4]oxathiepine-3,4-dicarboxylate. Compound **3r** (28 mg, Yield = 70%,  $R_f$  = 0.15 (PE/EA = 10:1)) was isolated as a yellow oil.  $^1H$  NMR (400 MHz,  $CDCl_3$ )  $\delta$  7.90–7.84 (m, 2H), 7.74–7.70 (m, 1H), 7.57–7.47 (m, 2H), 7.45 (d,  $J$  = 8.8 Hz, 1H), 6.56 (dd,  $J$  = 8.8, 6.0 Hz, 1H), 3.88 (s, 3H), 3.78 (s, 3H), 2.00–1.90 (m, 1H), 1.85–1.74 (m, 1H), 1.40–1.31 (m, 2H), 1.29–1.05 (m, 2H), 0.73 (t,  $J$  = 7.2 Hz, 3H);  $^{13}C$  NMR (100 MHz,  $CDCl_3$ )  $\delta$  164.7, 162.5, 154.3, 143.2, 139.6, 131.7, 131.3, 130.7, 129.8, 128.7, 127.7, 127.4, 125.9, 124.9, 120.9, 120.8, 53.5, 53.0, 30.7, 30.5, 22.1, 13.9. ESI-HRMS  $m/z$  calcd for  $C_{22}H_{23}O_5S$   $[M + H]^+$  399.1261, found 399.1264.



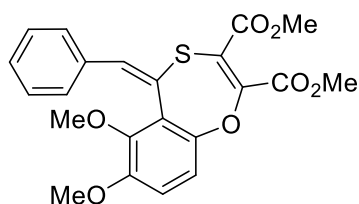

Dimethyl (E)-5-benzylidene-6,7-dimethoxy-5H-benzo[f][1,4]oxathiepine-2,3-dicarboxylate. Compound **5b** (79 mg, Yield = 92%,  $R_f$  = 0.36 (PE/EA = 3:1)) was isolated as a colorless oil.  $^1\text{H}$  NMR (400 MHz,  $(\text{CD}_3)_2\text{CO}$ )  $\delta$  7.26–7.21 (m, 3H), 7.15–7.10 (m, 3H), 6.99 (s, 1H), 6.56 (s, 1H), 3.87 (s, 3H), 3.85 (s, 3H), 3.76 (s, 3H), 3.52 (s, 3H);  $^{13}\text{C}$  NMR (100 MHz,  $(\text{CD}_3)_2\text{CO}$ )  $\delta$  164.6, 162.7, 152.0, 151.2, 148.4, 142.0, 135.9, 135.3, 130.3, 129.9, 129.1, 129.0, 127.6, 123.8, 112.2, 106.4, 56.4, 56.3, 53.6, 53.1; ESI-HRMS  $m/z$  calcd for  $\text{C}_{22}\text{H}_{21}\text{O}_7\text{S}$   $[\text{M} + \text{H}]^+$  429.1003, found 429.1004.

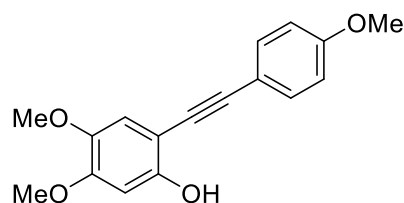

4,5-Dimethoxy-2-((4-methoxyphenyl)ethynyl)phenol. Compound **4f-2** (272 mg, Yield = 48%,  $R_f$  = 0.36 (PE/EA = 3:1)) was isolated as a yellow solid; mp 91–92 °C.  $^1\text{H}$  NMR (400 MHz,  $\text{CDCl}_3$ )  $\delta$  7.48–7.43 (m, 2H), 6.91–6.86 (m, 3H), 6.55 (s, 1H), 5.62 (s, 1H) 3.87 (s, 3H), 3.84 (s, 3H), 3.83 (s, 3H);  $^{13}\text{C}$  NMR (100 MHz,  $\text{CDCl}_3$ )  $\delta$  160.0, 152.1, 151.2, 143.0, 133.1, 114.9, 114.3, 113.5, 100.1, 99.3, 95.3, 82.0, 56.6, 56.1, 55.5; ESI-HRMS  $m/z$  calcd for  $\text{C}_{17}\text{H}_{17}\text{O}_4$   $[\text{M} + \text{H}]^+$  285.1121, found 285.1121.

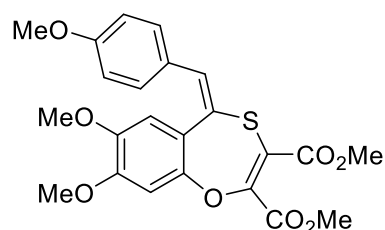

Dimethyl (E)-7,8-dimethoxy-5-(4-methoxybenzylidene)-5H-benzo[f][1,4]oxathiepine-2,3-dicarboxylate. Compound **5c** (84 mg, Yield = 92%,  $R_f$  = 0.29 (PE/EA = 3:1)) was isolated as a pale-yellow oil.  $^1\text{H}$  NMR (400 MHz,  $(\text{CD}_3)_2\text{CO}$ )  $\delta$  7.11–7.06 (m, 2H), 7.05 (s, 1H), 7.10–7.04 (m, 3H), 6.98 (s, 1H), 6.83–6.78 (m, 2H), 6.64 (s, 1H), 3.88 (s, 3H), 3.84 (s, 3H), 3.76 (s, 3H), 3.76 (s, 3H), 3.60 (s, 3H);  $^{13}\text{C}$  NMR (100 MHz,  $(\text{CD}_3)_2\text{CO}$ )  $\delta$  164.7, 162.8, 160.7, 151.9, 151.0, 148.5, 141.6, 135.5, 131.4, 130.5, 128.3, 124.3 (2C), 114.6, 112.0, 106.4, 56.5, 56.3, 55.6, 53.6, 53.1; ESI-HRMS  $m/z$  calcd for  $\text{C}_{23}\text{H}_{23}\text{O}_8\text{S}$   $[\text{M} + \text{H}]^+$  459.1108, found 459.1105.

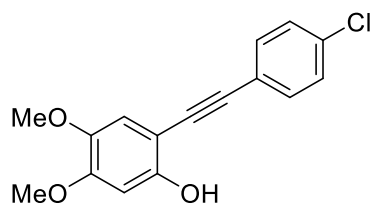

2-((4-Chlorophenyl)ethynyl)-4,5-dimethoxyphenol. Compound **4f-3** (243 mg, Yield = 42%,  $R_f = 0.37$  (PE/EA = 3:1)) was isolated as a yellow solid; mp 162–163 °C.  $^1\text{H NMR}$  (400 MHz,  $\text{CDCl}_3$ )  $\delta$  7.45–7.40 (m, 2H), 7.34–7.29 (m, 2H), 6.85 (s, 1H), 6.54 (s, 1H), 5.62 (s, 1H), 3.86 (s, 3H), 3.83 (s, 3H);  $^{13}\text{C NMR}$  (100 MHz,  $\text{CDCl}_3$ )  $\delta$  152.3, 151.6, 143.1, 134.6, 132.7, 128.9, 121.3, 113.4, 99.4, 94.1, 84.6, 56.5, 56.1, (1C peak is merged with other peaks); ESI-HRMS  $m/z$  calcd for  $\text{C}_{16}\text{H}_{14}\text{ClO}_3$   $[\text{M} + \text{H}]^+$  289.0626, found 289.0623.

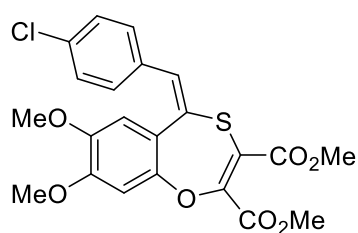

Dimethyl (*E*)-5-(4-chlorobenzylidene)-7,8-dimethoxy-5*H*-benzo[*f*][1,4]oxathiepine-2,3-dicarboxylate. Compound **5d** (79 mg, Yield = 85%,  $R_f = 0.37$  (PE/EA = 3:1)) was isolated as a white solid; mp 69–70 °C.  $^1\text{H NMR}$  (400 MHz,  $\text{CDCl}_3$ )  $\delta$  7.16–7.12 (m, 2H), 6.98–6.93 (m, 3H), 6.88 (s, 1H), 6.38 (s, 1H), 3.90 (s, 3H), 3.87 (s, 3H), 3.81 (s, 3H), 3.58 (s, 3H);  $^{13}\text{C NMR}$  (100 MHz,  $\text{CDCl}_3$ )  $\delta$  164.3, 162.3, 150.7, 150.2, 147.2, 140.6, 134.0, 133.6, 133.3, 130.4, 129.8, 128.6, 127.6, 123.1, 110.4, 105.6, 56.4, 56.3, 53.6, 53.1; ESI-HRMS  $m/z$  calcd for  $\text{C}_{22}\text{H}_{20}\text{ClO}_7\text{S}$   $[\text{M} + \text{H}]^+$  463.0613, found 463.0606.

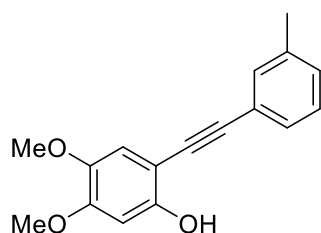

4,5-Dimethoxy-2-(*m*-tolylethynyl)phenol. Compound **4f-4** (148 mg, Yield = 28%,  $R_f = 0.46$  (PE/EA = 3:1)) was isolated as a yellow solid; mp 110–111 °C.  $^1\text{H NMR}$  (400 MHz,  $\text{CDCl}_3$ )  $\delta$  7.35–7.30 (m, 2H), 7.27–7.22 (m, 1H), 7.18–7.14 (m, 1H), 6.87 (s, 1H), 6.55 (s, 1H), 5.66 (s, 1H), 3.87 (s, 3H), 3.84 (s, 3H), 2.35 (s, 3H);  $^{13}\text{C NMR}$  (100 MHz,  $\text{CDCl}_3$ )  $\delta$  152.2, 151.4, 143.0, 138.3, 132.1, 129.5, 128.6, 128.5, 122.6, 113.4, 99.8, 99.3, 95.5, 83.1, 56.5, 56.1, 21.3; ESI-HRMS  $m/z$  calcd for  $\text{C}_{17}\text{H}_{17}\text{O}_3$   $[\text{M} + \text{H}]^+$  269.1172, found 269.1172.

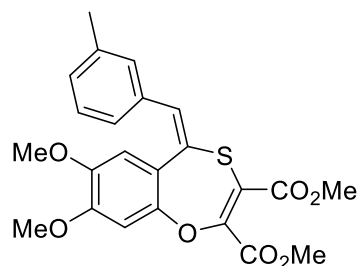

Dimethyl (*E*)-7,8-dimethoxy-5-(3-methylbenzylidene)-5*H*-benzo[*f*][1,4]oxathiepine-2,3-dicarboxylate. Compound **5e** (78 mg, Yield = 88%,  $R_f = 0.38$  (PE/EA = 3:1)) was isolated as a colorless oil.  $^1\text{H NMR}$  (400 MHz,  $\text{CDCl}_3$ )  $\delta$  7.07–7.02 (m, 1H), 7.01–6.97 (m, 2H), 6.89–6.87 (m, 2H), 6.83–6.79 (m, 1H), 6.43 (s, 1H), 3.91 (s, 3H), 3.87 (s, 3H), 3.82 (s, 3H), 3.57 (s, 3H), 2.21 (s, 3H);  $^{13}\text{C NMR}$  (100 MHz,  $\text{CDCl}_3$ )  $\delta$  164.5, 162.4, 150.5, 150.1, 147.1, 140.3, 138.0, 135.4, 134.8, 130.2, 130.1, 129.1, 128.2, 126.2, 123.7, 110.8, 105.5, 56.4, 56.3, 53.6, 53.0, 21.4, (1C peak is merged with other peaks); ESI-HRMS  $m/z$  calcd for  $\text{C}_{23}\text{H}_{23}\text{O}_7\text{S}$   $[\text{M} + \text{H}]^+$  443.1159, found 443.1166.

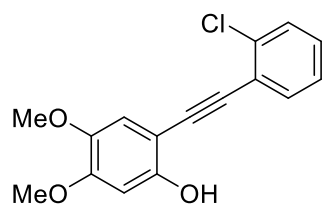

2-((2-Chlorophenyl)ethynyl)-4,5-dimethoxyphenol. Compound **4f-5** (173 mg, Yield = 30%,  $R_f = 0.46$  (PE/EA = 3:1)) was isolated as a yellow solid; mp 87–88 °C.  $^1\text{H NMR}$  (400 MHz,  $\text{CDCl}_3$ )  $\delta$  7.57–7.51 (m, 1H), 7.48–7.42 (m, 1H), 7.30–7.24 (m, 2H), 6.88 (s, 1H), 6.57 (s, 1H), 6.00 (s, 1H), 3.89 (s, 3H), 3.86 (s, 3H);  $^{13}\text{C NMR}$  (100 MHz,  $\text{CDCl}_3$ )  $\delta$  153.1, 151.9, 143.0, 135.1, 132.4, 129.3 (2C), 126.9, 122.9, 112.9, 99.3, 99.2, 92.5, 89.6, 56.6, 56.1; ESI-HRMS  $m/z$  calcd for  $\text{C}_{16}\text{H}_{14}\text{ClO}_3$   $[\text{M} + \text{H}]^+$  289.0626, found 289.0625.

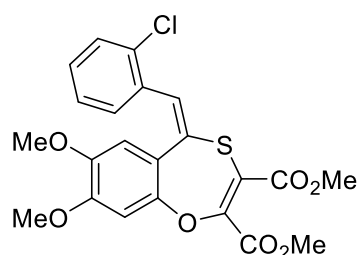

Dimethyl (*E*)-5-(2-chlorobenzylidene)-7,8-dimethoxy-5*H*-benzo[*f*][1,4]oxathiepine-2,3-dicarboxylate. Compound **5f** (75 mg, Yield = 81%,  $R_f = 0.35$  (PE/EA = 3:1)) was isolated as a white solid; mp 65–66 °C.  $^1\text{H NMR}$  (400 MHz,  $\text{CDCl}_3$ )  $\delta$  7.34 (dd,  $J = 8.0, 1.2$  Hz, 1H), 7.17 (s, 1H), 7.14–7.09 (m, 1H), 6.97–6.92 (m, 1H), 6.86 (s, 1H), 6.84 (dd,  $J = 8.0, 1.6$  Hz, 1H), 6.24 (s, 1H), 3.88 (s, 6H), 3.83 (s, 3H), 3.48 (s, 3H);  $^{13}\text{C NMR}$  (100 MHz,  $\text{CDCl}_3$ )  $\delta$  164.3, 162.2, 150.6, 150.5, 146.9, 140.8, 133.7, 133.6, 131.1, 131.0, 129.9, 129.8, 129.5, 129.2, 126.5, 122.7, 110.9, 105.4, 56.2 (2C), 53.6, 53.1; ESI-HRMS  $m/z$  calcd for  $\text{C}_{22}\text{H}_{20}\text{ClO}_7\text{S}$   $[\text{M} + \text{H}]^+$  463.0613, found 463.0616.

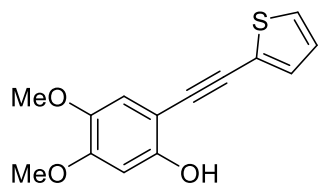

4,5-Dimethoxy-2-(thiophen-2-ylethynyl)phenol. Compound **4f-6** (150 mg, Yield = 29%,  $R_f$  = 0.35 (PE/EA = 3:1)) was isolated as a yellow solid; mp 78–79 °C.  $^1\text{H}$  NMR (400 MHz,  $\text{CDCl}_3$ )  $\delta$  7.31 (dd,  $J$  = 5.2, 1.2 Hz, 1H), 7.28 (dd,  $J$  = 3.6, 1.2 Hz, 1H), 7.02 (dd,  $J$  = 5.2, 3.6 Hz, 1H), 6.86 (s, 1H), 6.54 (s, 1H), 5.60 (s, 1H), 3.87 (s, 3H), 3.83 (s, 3H);  $^{13}\text{C}$  NMR (100 MHz,  $\text{CDCl}_3$ )  $\delta$  152.4, 151.7, 143.1, 132.3, 127.8, 127.3, 122.8, 113.4, 99.5, 99.4, 88.2, 87.2, 56.5, 56.1; ESI-HRMS  $m/z$  calcd for  $\text{C}_{14}\text{H}_{13}\text{O}_3\text{S}$  [ $\text{M} + \text{H}$ ] $^+$  261.0580, found 261.0578.

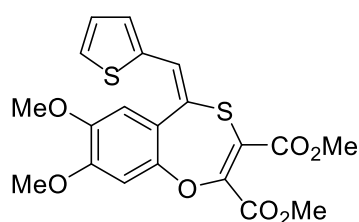

Dimethyl

(*E*)-7,8-dimethoxy-5-(thiophen-2-ylmethylene)-5*H*-benzo[*f*][1,4]oxathiepine-2,3-dicarboxylate.

Compound **5g** (72 mg, Yield = 83%,  $R_f$  = 0.34 (PE/EA = 3:1)) was isolated as a pale-yellow oil.  $^1\text{H}$  NMR (400 MHz,  $\text{CDCl}_3$ )  $\delta$  7.40–7.38 (m, 1H), 7.38–7.36 (m, 1H), 7.19–7.17 (m, 1H), 7.01–6.97 (m, 3H), 3.89 (s, 3H), 3.83 (s, 3H), 3.77 (s, 3H), 3.75 (s, 3H);  $^{13}\text{C}$  NMR (100 MHz,  $\text{CDCl}_3$ )  $\delta$  164.7, 162.9, 152.4, 151.0, 148.5, 142.2, 138.5, 132.0, 130.2, 130.0, 129.1, 127.4, 123.4, 123.3, 112.8, 106.5, 56.6, 56.3, 53.6, 53.1; ESI-HRMS  $m/z$  calcd for  $\text{C}_{20}\text{H}_{19}\text{O}_7\text{S}_2$  [ $\text{M} + \text{H}$ ] $^+$  435.0567, found 435.0566.

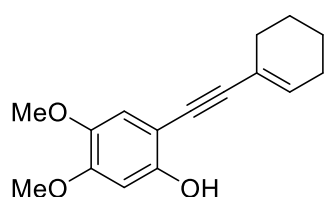

2-(Cyclohex-1-en-1-ylethynyl)-4,5-dimethoxyphenol. Compound **4f-7** (150 mg, Yield = 29%,  $R_f$  = 0.47 (PE/EA = 3:1)) was isolated as a yellow oil.  $^1\text{H}$  NMR (400 MHz,  $\text{CDCl}_3$ )  $\delta$  6.78 (s, 1H), 6.51 (s, 1H), 6.22–6.18 (m, 1H), 5.53 (s, 1H), 3.84 (s, 3H), 3.80 (s, 3H), 2.25–2.19 (m, 2H), 2.18–2.11 (m, 2H), 1.72–1.58 (m, 4H);  $^{13}\text{C}$  NMR (100 MHz,  $\text{CDCl}_3$ )  $\delta$  151.9, 151.1, 143.0, 135.6, 120.5, 113.7, 100.4, 99.3, 97.3, 80.6, 56.6, 56.1, 29.5, 25.9, 22.4, 21.6; ESI-HRMS  $m/z$  calcd for  $\text{C}_{16}\text{H}_{19}\text{O}_3$  [ $\text{M} + \text{H}$ ] $^+$  259.1329, found 259.1329.

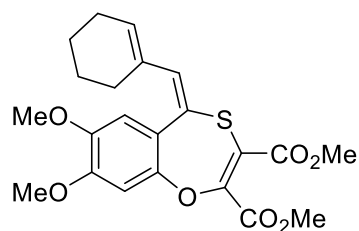

Dimethyl

(*E*)-5-(cyclohex-1-en-1-ylmethylene)-7,8-dimethoxy-5*H*-benzo[*f*][1,4]oxathiepine-2,3-dicarboxylate.

Compound **5h** (71 mg, Yield = 82%,  $R_f = 0.45$  (PE/EA = 3:1)) was isolated as a yellow oil.  $^1\text{H}$  NMR (400 MHz,  $(\text{CD}_3)_2\text{CO}$ )  $\delta$  6.87 (s, 1H), 6.83 (s, 1H), 6.61 (s, 1H), 5.90–5.86 (m, 1H), 3.84 (s, 3H), 3.82 (s, 3H), 3.81 (s, 3H), 3.73 (s, 3H), 2.14–2.07 (m, 2H), 1.83–1.77 (m, 2H), 1.54–1.42 (m, 4H);  $^{13}\text{C}$  NMR (100 MHz,  $(\text{CD}_3)_2\text{CO}$ )  $\delta$  164.8, 162.9, 151.6, 150.4, 147.7, 141.4, 140.5, 135.5, 135.4, 130.6, 124.9, 122.6, 112.9, 105.8, 56.7, 56.2, 53.5, 53.0, 28.4, 26.7, 23.3, 22.4; ESI-HRMS  $m/z$  calcd for  $\text{C}_{22}\text{H}_{25}\text{O}_7\text{S}$   $[\text{M} + \text{H}]^+$  433.1316, found 433.1312.

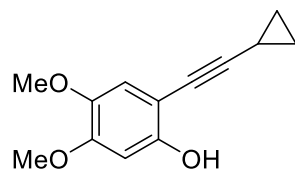

2-(Cyclopropylethynyl)-4,5-dimethoxyphenol. Compound **4f-8** (157 mg, Yield = 36%,  $R_f = 0.32$  (PE/EA = 3:1)) was isolated as a pale-yellow oil.  $^1\text{H}$  NMR (400 MHz,  $\text{CDCl}_3$ )  $\delta$  6.74 (s, 1H), 6.50 (s, 1H), 5.55 (s, 1H), 3.84 (s, 3H), 3.79 (s, 3H), 1.53–1.45 (m, 1H), 0.94–0.88 (m, 2H), 0.84–0.79 (m, 2H);  $^{13}\text{C}$  NMR (100 MHz,  $\text{CDCl}_3$ )  $\delta$  152.4, 150.7, 142.8, 113.8, 100.2, 99.7, 99.0, 69.8, 56.5, 56.0, 9.1, 0.3; ESI-HRMS  $m/z$  calcd for  $\text{C}_{13}\text{H}_{15}\text{O}_3$   $[\text{M} + \text{H}]^+$  219.1016, found 219.1016.

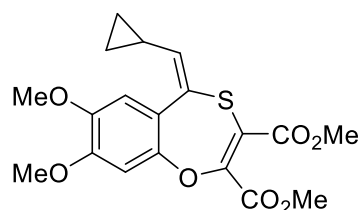

Dimethyl (*E*)-5-(cyclopropylmethylene)-7,8-dimethoxy-5*H*-benzo[*f*][1,4]oxathiepine-2,3-dicarboxylate. Compound **5i** (46 mg, Yield = 59%,  $R_f = 0.29$  (PE/EA = 3:1)) was isolated as a pale-yellow oil.  $^1\text{H}$  NMR (400 MHz,  $\text{CDCl}_3$ )  $\delta$  6.84 (s, 1H), 6.82 (s, 1H), 5.52 (d,  $J = 10.0$  Hz, 1H), 3.88 (s, 3H), 3.86 (s, 3H), 3.85 (s, 3H), 3.79 (s, 3H), 1.61–1.51 (m, 1H), 0.85–0.79 (m, 2H), 0.60–0.54 (m, 2H);  $^{13}\text{C}$  NMR (100 MHz,  $\text{CDCl}_3$ )  $\delta$  164.7, 162.6, 150.2, 150.0, 146.6, 142.9, 139.9, 130.2, 123.6, 121.2, 111.2, 105.7, 56.5, 56.3, 53.5, 53.0, 12.8, 8.2; ESI-HRMS  $m/z$  calcd for  $\text{C}_{19}\text{H}_{21}\text{O}_7\text{S}$   $[\text{M} + \text{H}]^+$  393.1003, found 393.1001.

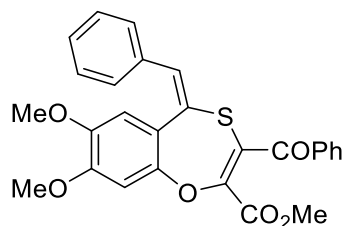

Methyl (*E*)-3-benzoyl-5-benzylidene-7,8-dimethoxy-5*H*-benzo[*f*][1,4]oxathiepine-2-carboxylate. Compound **5j** (86 mg, Yield = 91%,  $R_f = 0.38$  (PE/EA = 3:1)) was isolated as a colorless oil.  $^1\text{H NMR}$  (400 MHz,  $(\text{CD}_3)_2\text{CO}$ )  $\delta$  7.88–7.84 (m, 2H), 7.68–7.62 (m, 1H), 7.55–7.49 (m, 2H), 7.29–7.23 (m, 3H), 7.17–7.13 (m, 2H), 7.12 (s, 1H), 7.05 (s, 1H), 6.61 (s, 1H), 3.89 (s, 3H), 3.63 (s, 3H), 3.55 (s, 3H);  $^{13}\text{C NMR}$  (100 MHz,  $(\text{CD}_3)_2\text{CO}$ )  $\delta$  188.6, 162.5, 152.1, 151.5, 148.3, 138.8, 138.5, 136.4, 136.0, 135.1, 134.6, 129.9, 129.8, 129.7, 129.2, 129.0, 128.2, 123.7, 112.3, 106.3, 56.4, 56.3, 52.7; ESI-HRMS  $m/z$  calcd for  $\text{C}_{27}\text{H}_{23}\text{O}_6\text{S}$   $[\text{M} + \text{H}]^+$  475.1210, found 475.1209.

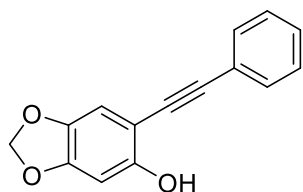

6-(Phenylethynyl)benzo[*d*][1,3]dioxol-5-ol. Compound **4e** (233 mg, Yield = 98%,  $R_f = 0.38$  (PE/EA = 3:1)) was isolated as a yellow solid; mp 88–89 °C.  $^1\text{H NMR}$  (400 MHz,  $\text{CDCl}_3$ )  $\delta$  7.53–7.49 (m, 2H), 7.38–7.34 (m, 3H), 6.83 (s, 1H), 6.54 (s, 1H), 5.94 (s, 2H), 5.75 (s, 1H);  $^{13}\text{C NMR}$  (100 MHz,  $\text{CDCl}_3$ )  $\delta$  153.4, 149.7, 141.3, 131.6, 128.7, 128.6, 122.7, 109.6, 101.6, 100.6, 97.3, 95.5, 83.5; ESI-HRMS  $m/z$  calcd for  $\text{C}_{15}\text{H}_{11}\text{O}_3$   $[\text{M} + \text{H}]^+$  239.0703, found 239.0703.

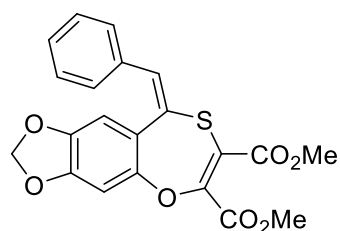

Dimethyl (*E*)-9-benzylidene-9*H*-[1,3]dioxolo[4',5':4,5]benzo[1,2-*f*][1,4]oxathiepine-6,7-dicarboxylate. Compound **5k** (75 mg, Yield = 91%,  $R_f = 0.38$  (PE/EA = 3:1)) was isolated as a yellow oil.  $^1\text{H NMR}$  (400 MHz,  $(\text{CD}_3)_2\text{CO}$ )  $\delta$  7.28–7.22 (m, 3H), 7.16–7.12 (m, 3H), 6.95 (s, 1H), 6.49 (s, 1H), 6.06 (s, 2H), 3.86 (s, 3H), 3.77 (s, 3H);  $^{13}\text{C NMR}$  (100 MHz,  $(\text{CD}_3)_2\text{CO}$ )  $\delta$  164.5, 162.6, 151.9, 150.1, 146.7, 141.5, 136.3, 135.7, 131.1, 129.9, 129.2, 129.1, 127.1, 125.5, 108.0, 104.0, 103.3, 53.7, 53.2; ESI-HRMS  $m/z$  calcd for  $\text{C}_{22}\text{H}_{17}\text{O}_7\text{S}$   $[\text{M} + \text{H}]^+$  413.0690, found 413.0693.

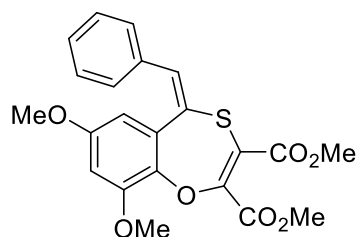

Dimethyl (E)-5-benzylidene-7,9-dimethoxy-5H-benzo[f][1,4]oxathiepine-2,3-dicarboxylate. Compound **5i** (75 mg, Yield = 88%,  $R_f = 0.36$  (PE/EA = 3:1)) was isolated as a yellow oil.  $^1\text{H NMR}$  (400 MHz,  $\text{CDCl}_3$ )  $\delta$  7.18–7.13 (m, 3H), 7.10 (s, 1H), 7.04–7.00 (m, 2H), 6.52 (d,  $J = 2.4$  Hz, 1H), 6.25 (d,  $J = 2.4$  Hz, 1H), 3.86 (s, 3H), 3.83 (s, 3H), 3.82 (s, 3H), 3.35 (s, 3H);  $^{13}\text{C NMR}$  (100 MHz,  $\text{CDCl}_3$ )  $\delta$  164.6, 162.3, 162.0, 157.8, 156.1, 139.1, 137.8, 136.2, 131.7, 128.1 (2C), 121.1, 114.8, 98.8, 97.4, 55.8, 55.7, 53.6, 53.0, (1C peak was merged with other peaks); ESI-HRMS  $m/z$  calcd for  $\text{C}_{22}\text{H}_{21}\text{O}_7\text{S}$  [ $\text{M} + \text{H}$ ] $^+$  429.1003, found 429.1004.

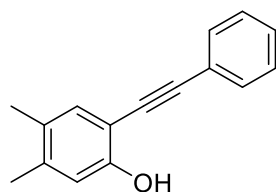

4,5-Dimethyl-2-(phenylethynyl)phenol. Compound **4i** (1.62 g, Yield = 73%,  $R_f = 0.60$  (PE/EA = 20:1)) was isolated as a white solid; mp 100–101 °C.  $^1\text{H NMR}$  (400 MHz,  $\text{CDCl}_3$ )  $\delta$  7.56–7.50 (m, 2H), 7.40–7.33 (m, 3H), 7.18 (s, 1H), 6.79 (s, 1H), 5.63 (s, 1H), 2.25 (s, 3H), 2.19 (s, 3H);  $^{13}\text{C NMR}$  (100 MHz,  $\text{CDCl}_3$ )  $\delta$  154.7, 139.9, 132.2, 131.6, 128.7, 128.6, 122.9, 116.0, 106.6, 95.7, 83.6, 20.3, 18.8, (1C peak is merged with other peaks); ESI-HRMS  $m/z$  calcd for  $\text{C}_{16}\text{H}_{15}\text{O}$  [ $\text{M} + \text{H}$ ] $^+$  223.1117, found 223.1119.

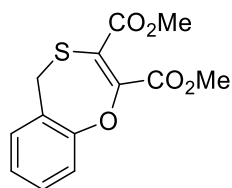

Dimethyl 5H-benzo[f][1,4]oxathiepine-2,3-dicarboxylate. Compound **7a** (43 mg, Y = 51%,  $R_f = 0.41$  (PE/EA = 5:1)) was isolated as a yellow oil.  $^1\text{H NMR}$  (400 MHz,  $\text{CDCl}_3$ )  $\delta$  7.30–7.27 (m, 1H), 7.25–7.14 (m, 3H), 4.31 (s, 2H), 3.86 (s, 3H), 3.78 (s, 3H);  $^{13}\text{C NMR}$  (100 MHz,  $\text{CDCl}_3$ )  $\delta$  164.9, 162.8, 157.4, 139.8, 132.3, 129.8, 128.0, 127.6, 126.3, 121.8, 53.5, 53.0, 31.3. ESI-HRMS  $m/z$  calcd for  $\text{C}_{13}\text{H}_{13}\text{O}_5\text{S}$  [ $\text{M} + \text{H}$ ] $^+$  281.0478, found 281.0478.

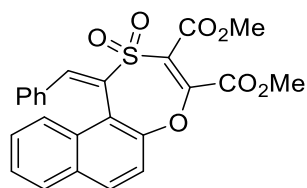

Dimethyl (E)-1-benzylidene-1*H*-naphtho[1,2-*f*][1,4]oxathiepine-3,4-dicarboxylate 2,2-dioxide. Compound **3a'** (81 mg, Yield = 90%,  $R_f = 0.19$  (PE/EA = 5:1)) was isolated as a colorless oil.  $^1\text{H}$  NMR (400 MHz,  $\text{CDCl}_3$ )  $\delta$  8.26 (s, 1H), 8.00 (d,  $J = 9.2$  Hz, 1H), 7.92 (d,  $J = 8.0$  Hz, 1H), 7.77 (d,  $J = 8.8$  Hz, 1H), 7.55–7.51 (m, 1H), 7.49–7.42 (m, 2H), 7.30–7.24 (m, 1H), 7.16–7.07 (m, 4H), 3.96 (s, 3H), 3.94 (s, 3H);  $^{13}\text{C}$  NMR (100 MHz,  $\text{CDCl}_3$ )  $\delta$  161.7, 161.1, 152.4, 152.0, 144.1, 132.4, 132.3, 131.7, 131.4, 130.9, 130.7, 130.5, 129.0, 128.7 (2C), 127.3, 125.0, 124.7, 119.8, 118.8, 53.9 (2C). ESI-HRMS  $m/z$  calcd for  $\text{C}_{24}\text{H}_{19}\text{O}_7\text{S}$   $[\text{M} + \text{H}]^+$  451.0846, found 451.0847.

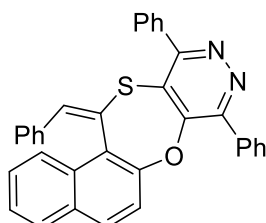

(E)-13-Benzylidene-8,11-diphenyl-13*H*-naphtho[1',2':6,7][1,4]oxathiepine[2,3-*d*]pyridazine. Compound **3c'** (99 mg, Yield = 98%,  $R_f = 0.25$  (PE/EA = 5:1)) was isolated as a white solid; mp 138–149 °C.  $^1\text{H}$  NMR (400 MHz,  $\text{CDCl}_3$ )  $\delta$  8.16–8.12 (m, 2H), 7.77 (d,  $J = 8.3$  Hz, 1H), 7.71 (d,  $J = 8.8$  Hz, 1H), 7.66–7.59 (m, 5H), 7.56–7.52 (m, 1H), 7.52–7.47 (m, 3H), 7.46 (s, 1H), 7.40–7.34 (m, 1H), 7.29–7.24 (m, 1H), 7.09–7.04 (m, 1H), 7.03–6.97 (m, 2H), 6.91–6.86 (m, 2H), 6.70 (d,  $J = 8.8$  Hz, 1H);  $^{13}\text{C}$  NMR (100 MHz,  $\text{CDCl}_3$ )  $\delta$  158.9, 154.1, 152.9, 149.6, 138.7, 135.6, 134.7, 134.5, 132.6, 132.0, 131.3, 130.6, 129.8, 129.7, 129.4, 128.9, 128.6 (2C), 128.5 (3C), 128.4, 128.2, 127.6, 126.3, 124.9, 123.6, 120.5. ESI-HRMS  $m/z$  calcd for  $\text{C}_{34}\text{H}_{23}\text{N}_2\text{OS}$   $[\text{M} + \text{H}]^+$  507.1526, found 507.1522.



# 11. NMR Spectra

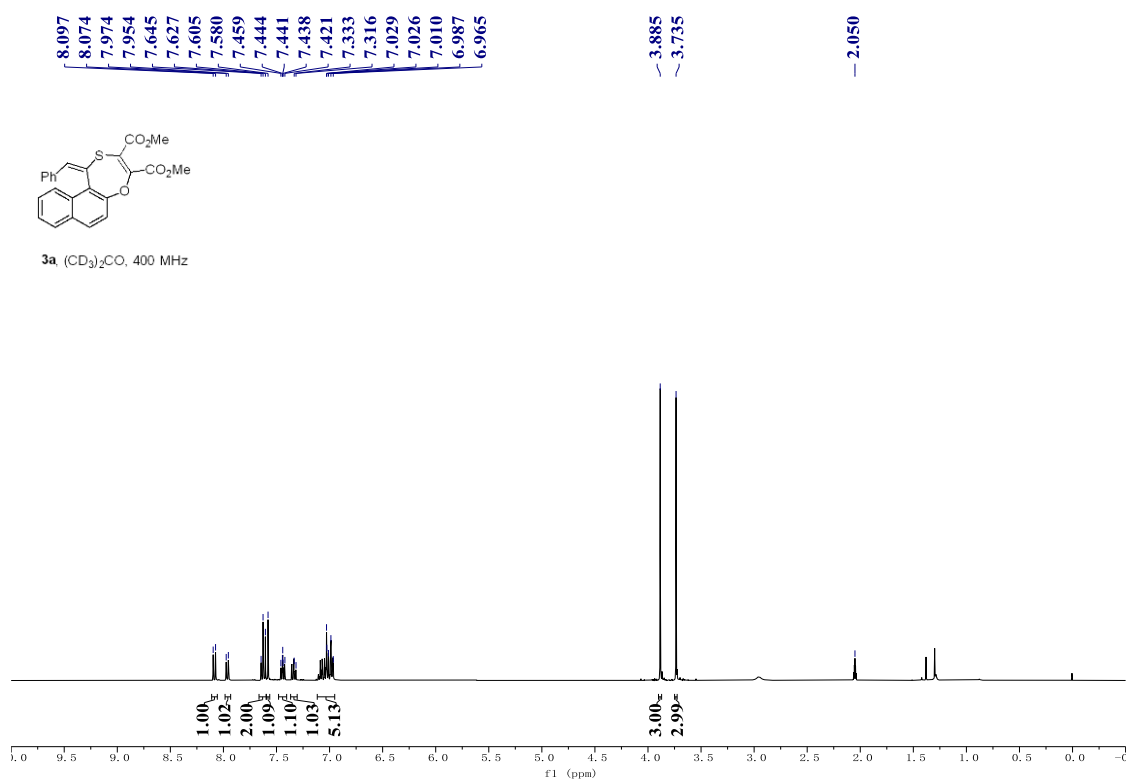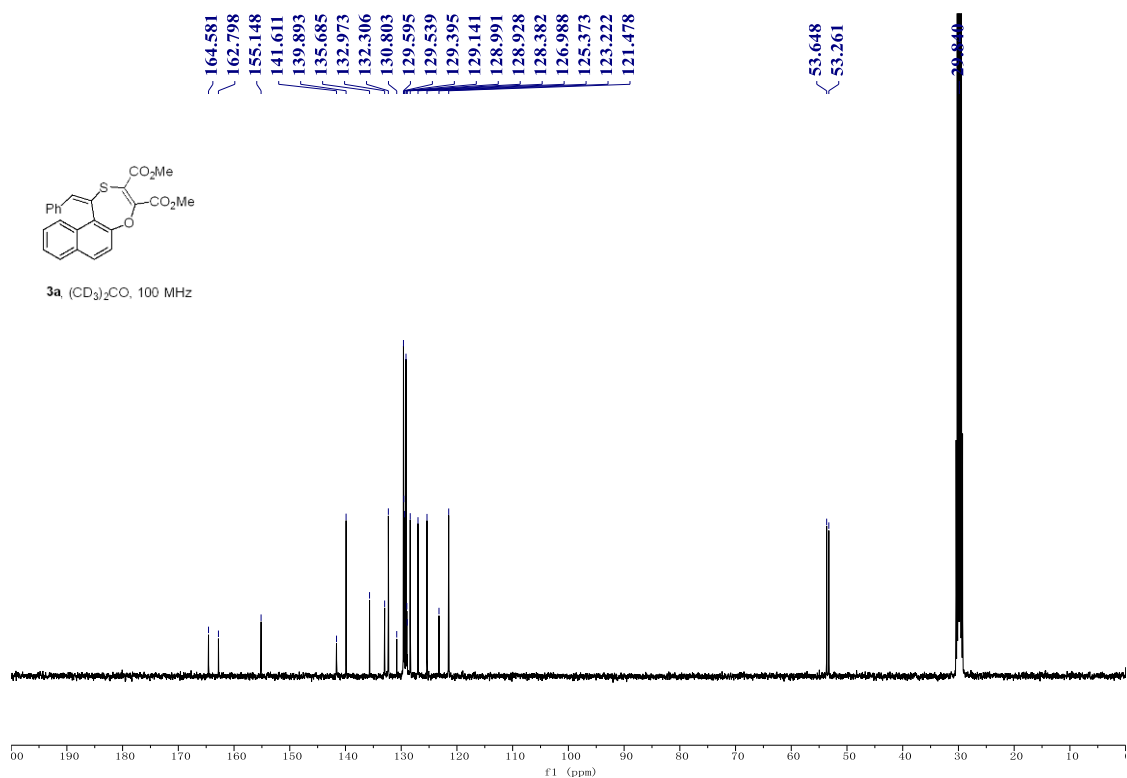

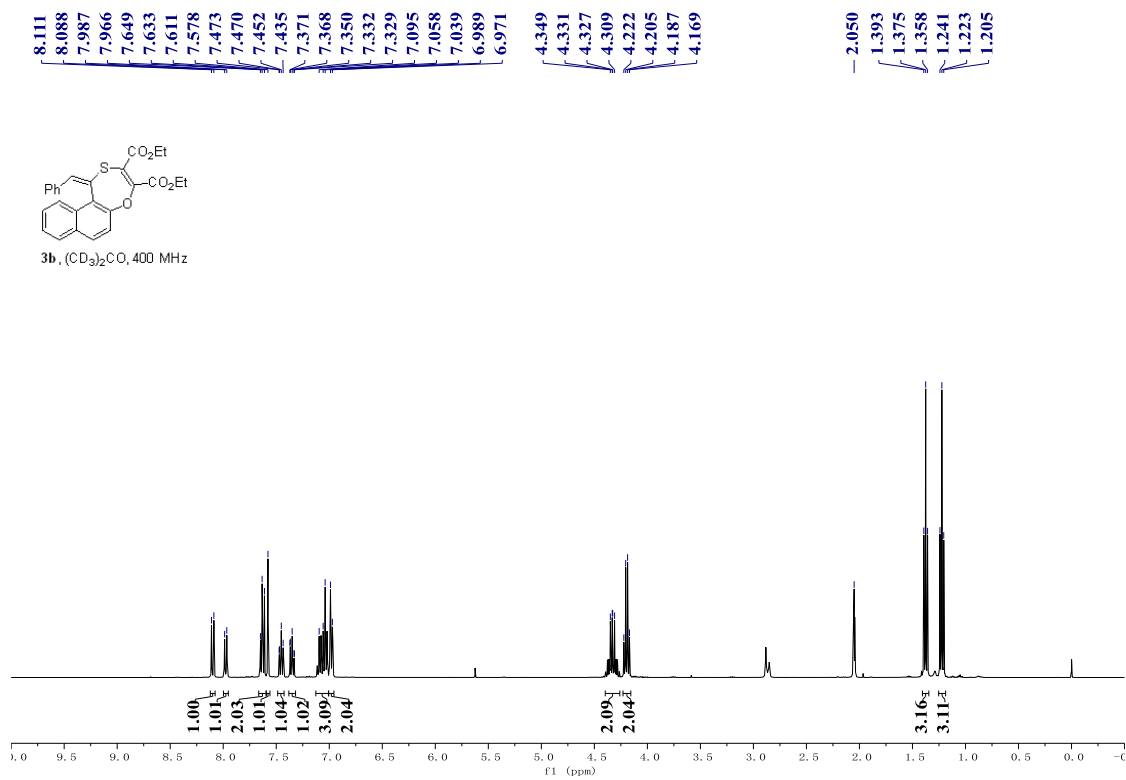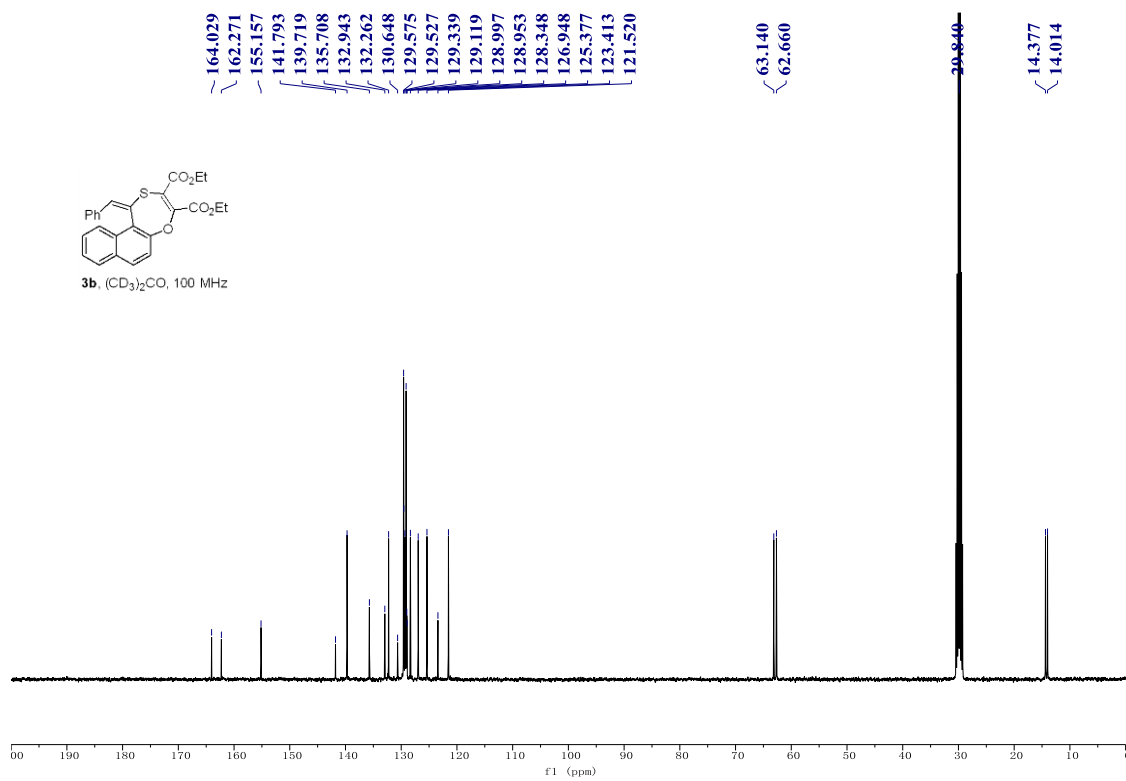

7.999  
7.981  
7.978  
7.884  
7.867  
7.838  
7.817  
7.806  
7.783  
7.626  
7.605  
7.583  
7.504  
7.483  
7.463  
7.382  
7.362  
7.260  
7.094  
7.030  
6.959  
6.920  
6.898

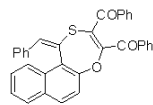

3c, CDCl<sub>3</sub>, 400 MHz

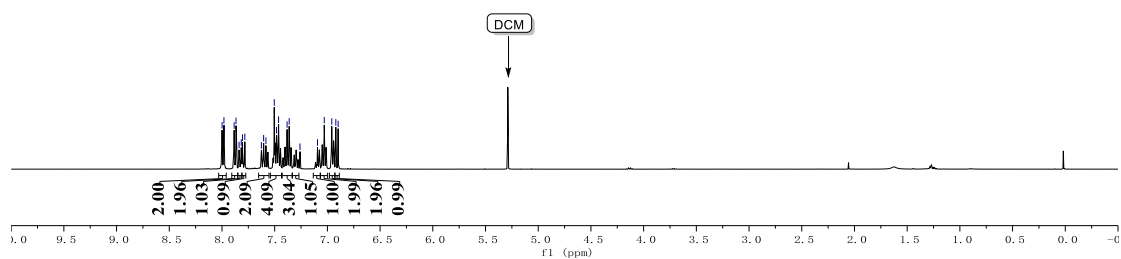

189.249  
187.798

154.000  
144.911  
139.884  
138.839  
136.502  
135.640  
134.638  
133.577  
132.898  
131.865  
131.372  
130.110  
129.041  
128.760  
128.677  
128.567  
128.432  
128.315  
127.546  
126.090  
124.968  
123.534  
120.436  
77.160

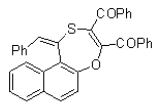

3c, CDCl<sub>3</sub>, 100 MHz

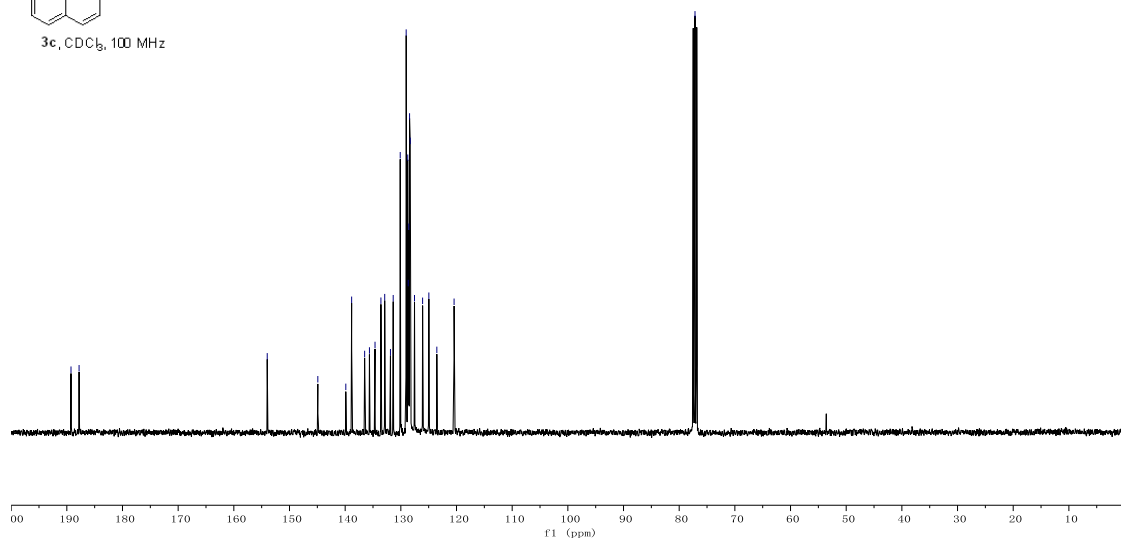

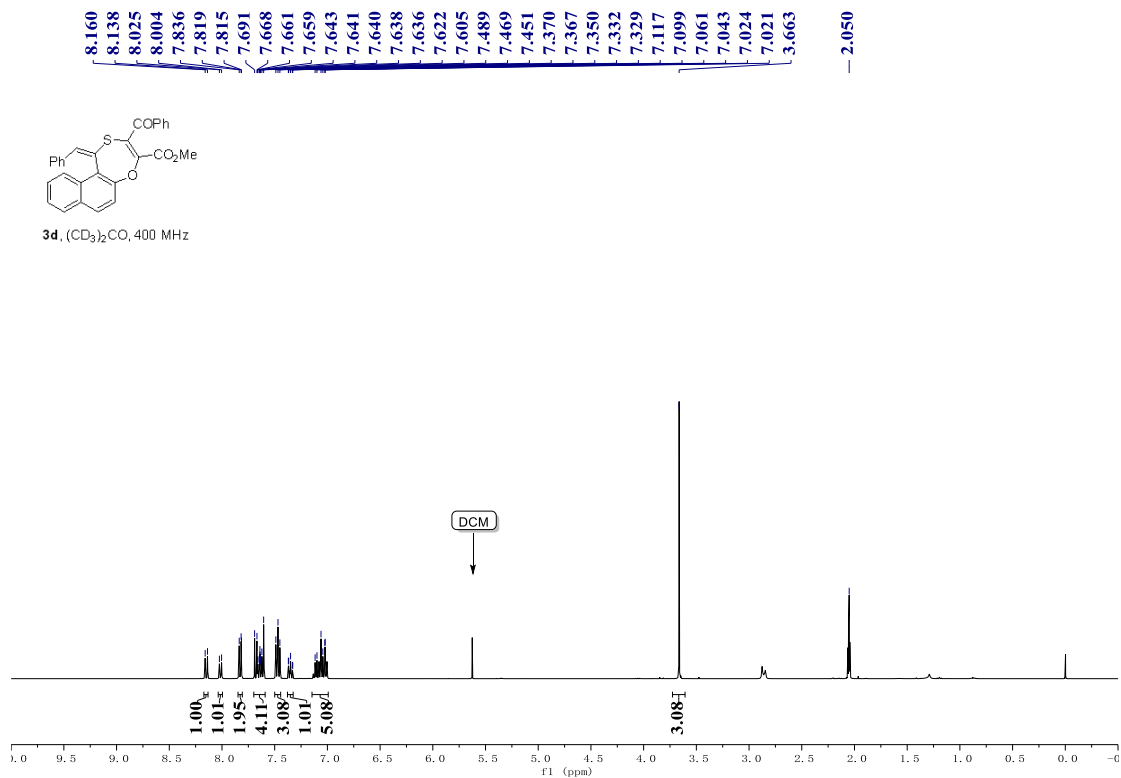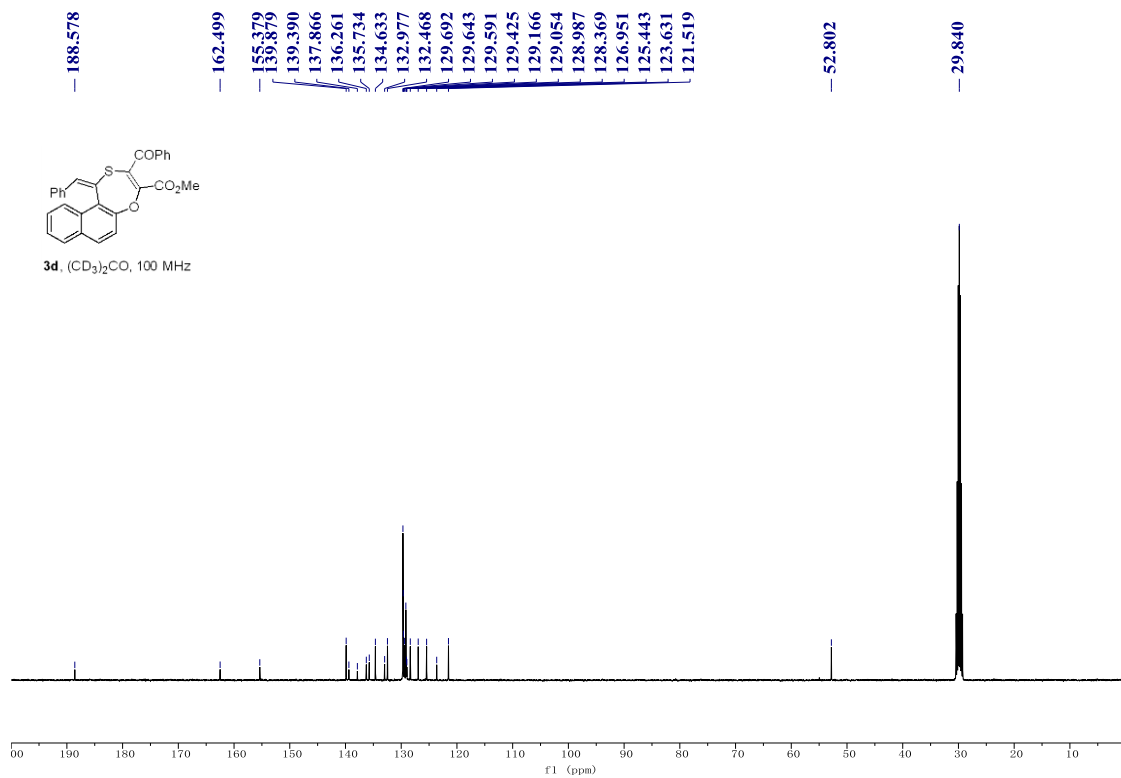

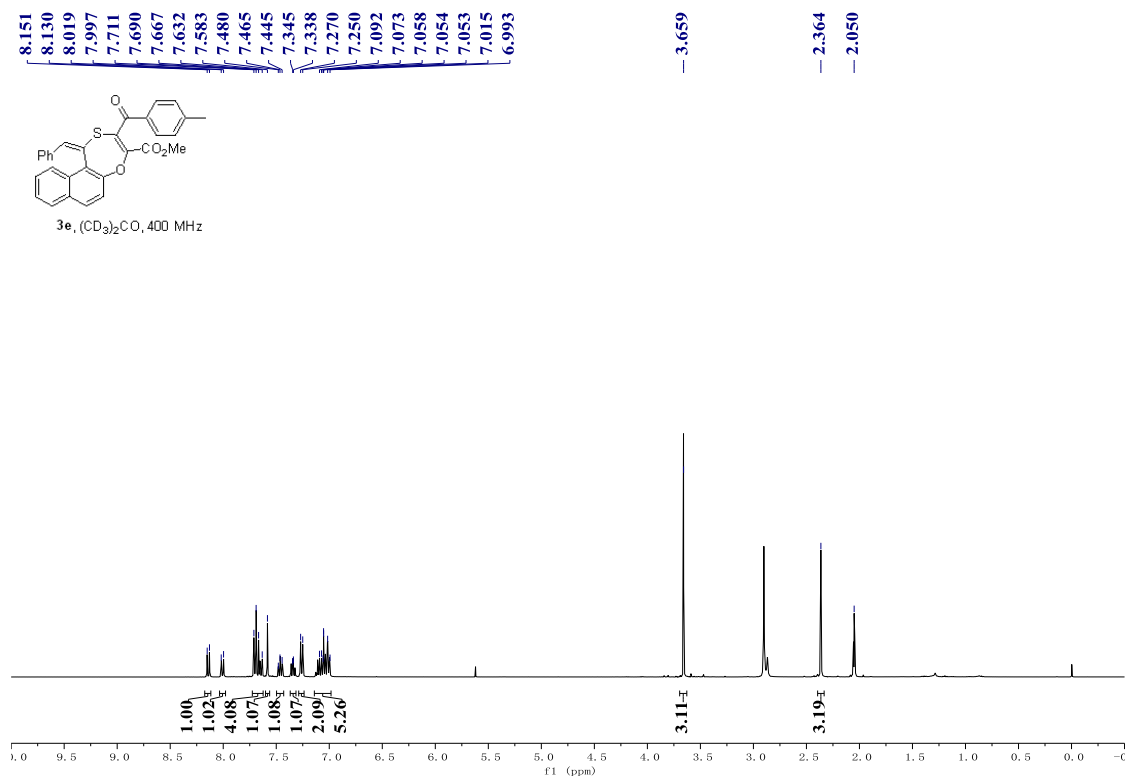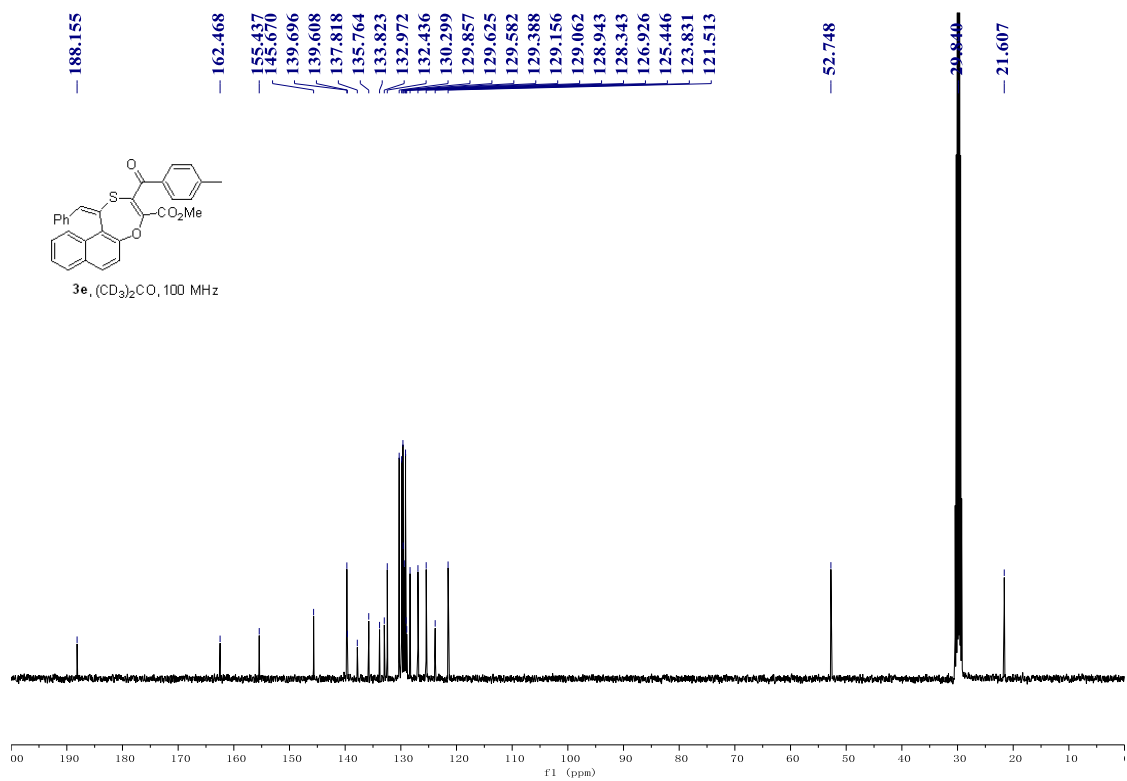

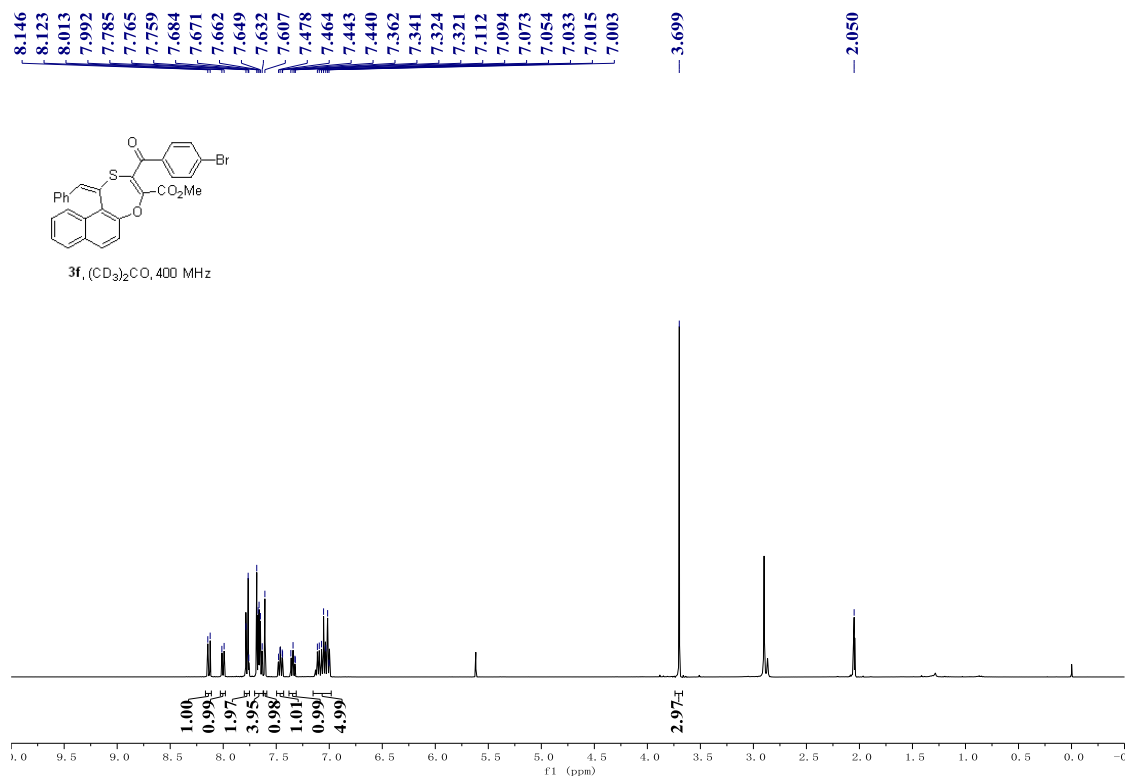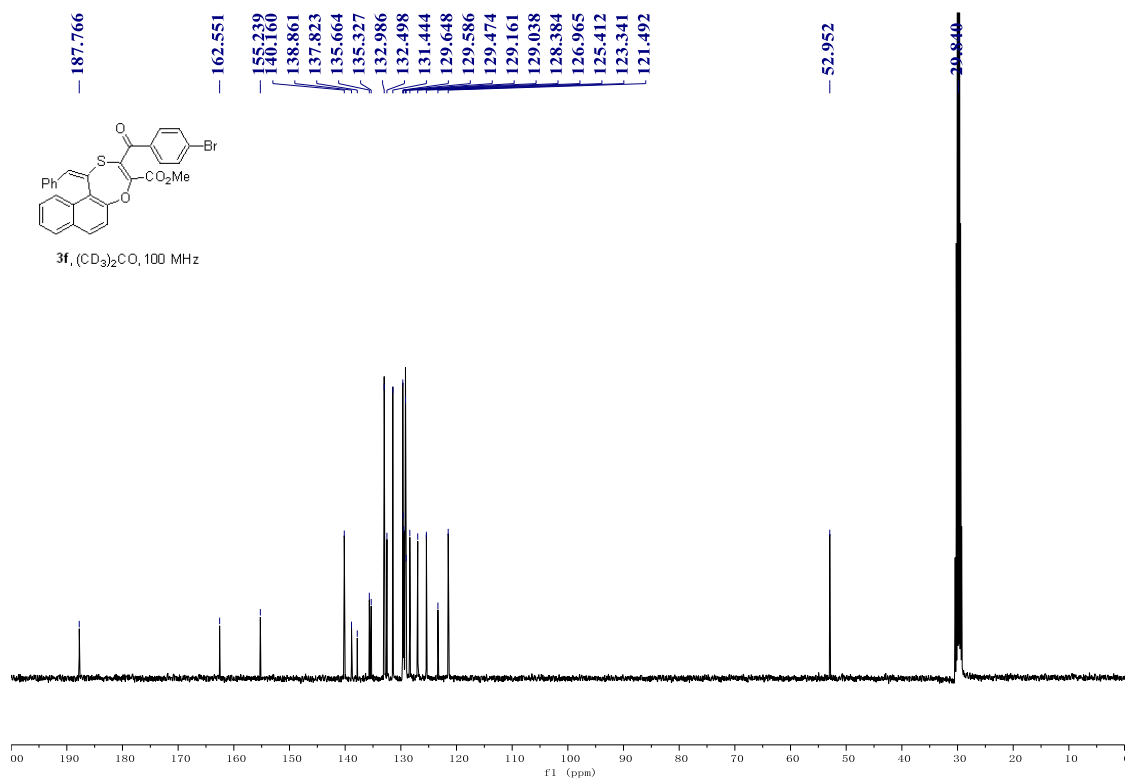



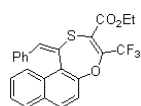

3g, CDCl<sub>3</sub>, 376MHz

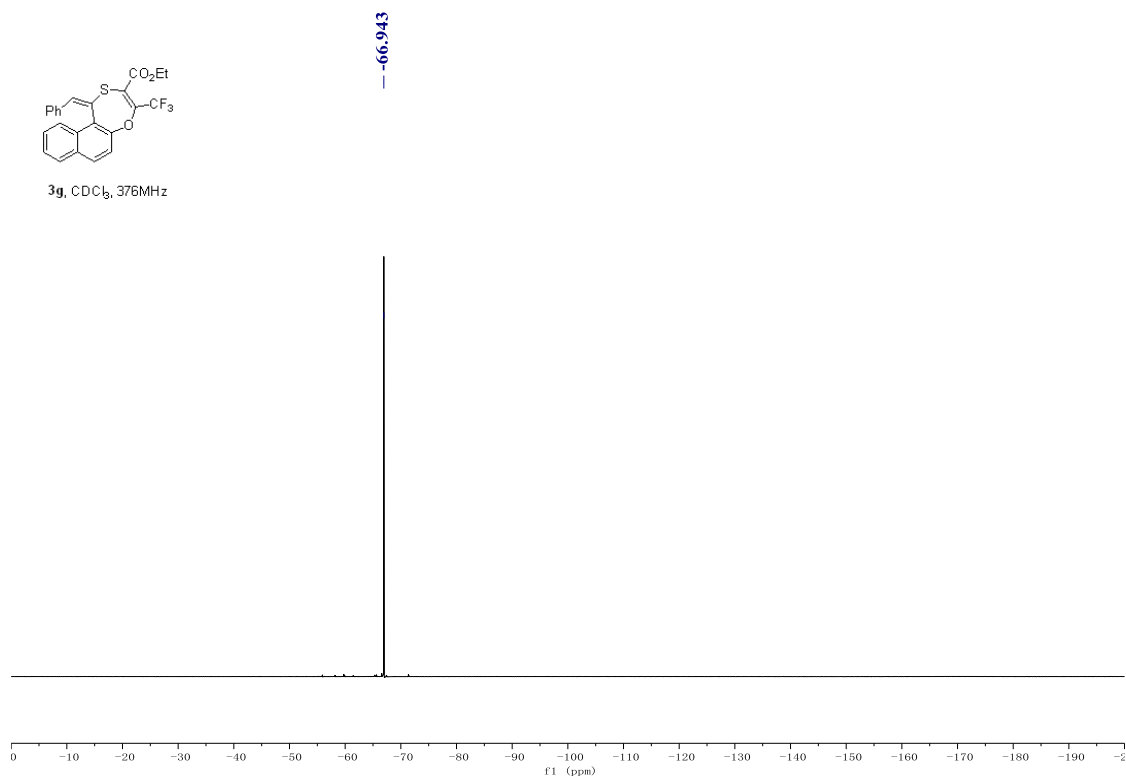

8.108  
8.086  
7.671  
7.650  
7.649  
7.611  
7.589  
7.505  
7.483  
7.480  
7.463  
7.407  
7.386  
6.925  
6.908  
6.903  
6.613  
6.607  
6.590

3.875  
3.726  
3.653

2.050

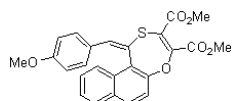

3h, (CD<sub>3</sub>)<sub>2</sub>CO, 400MHz

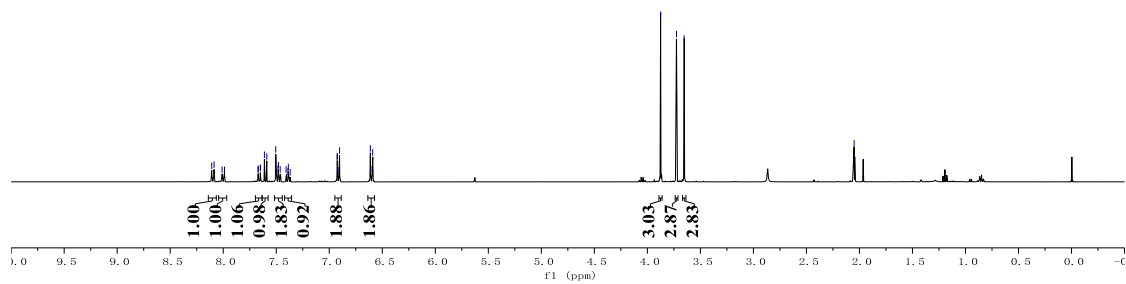



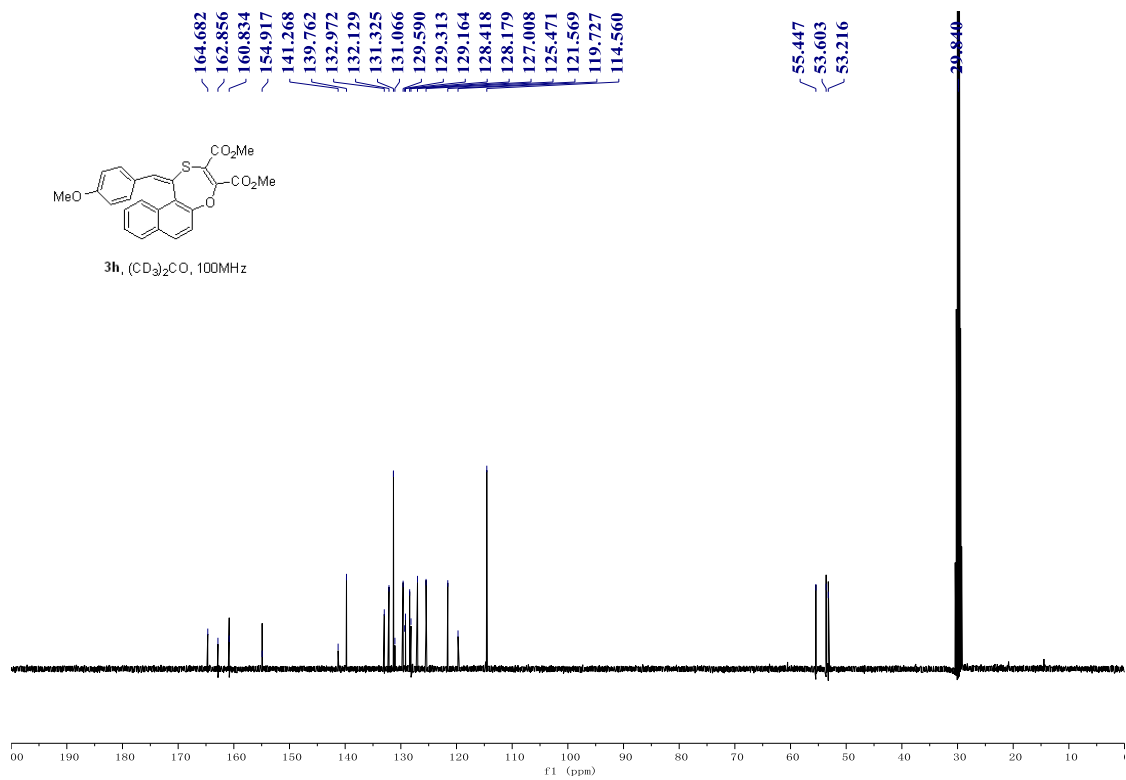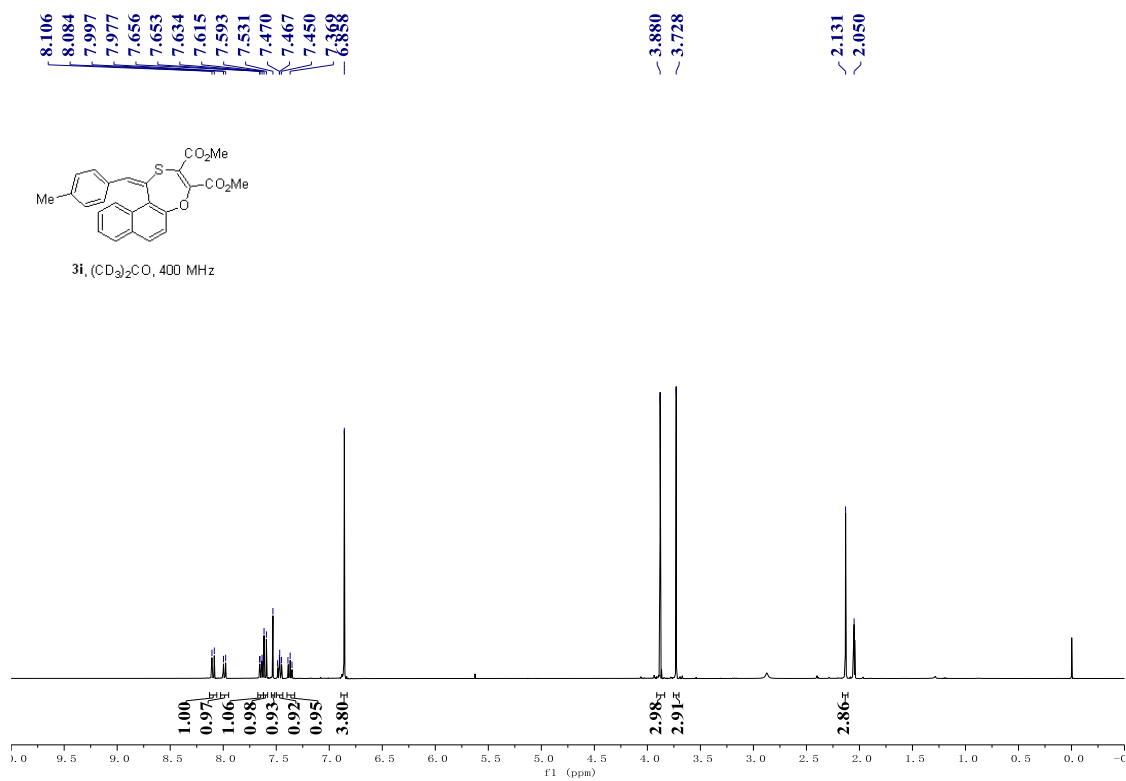

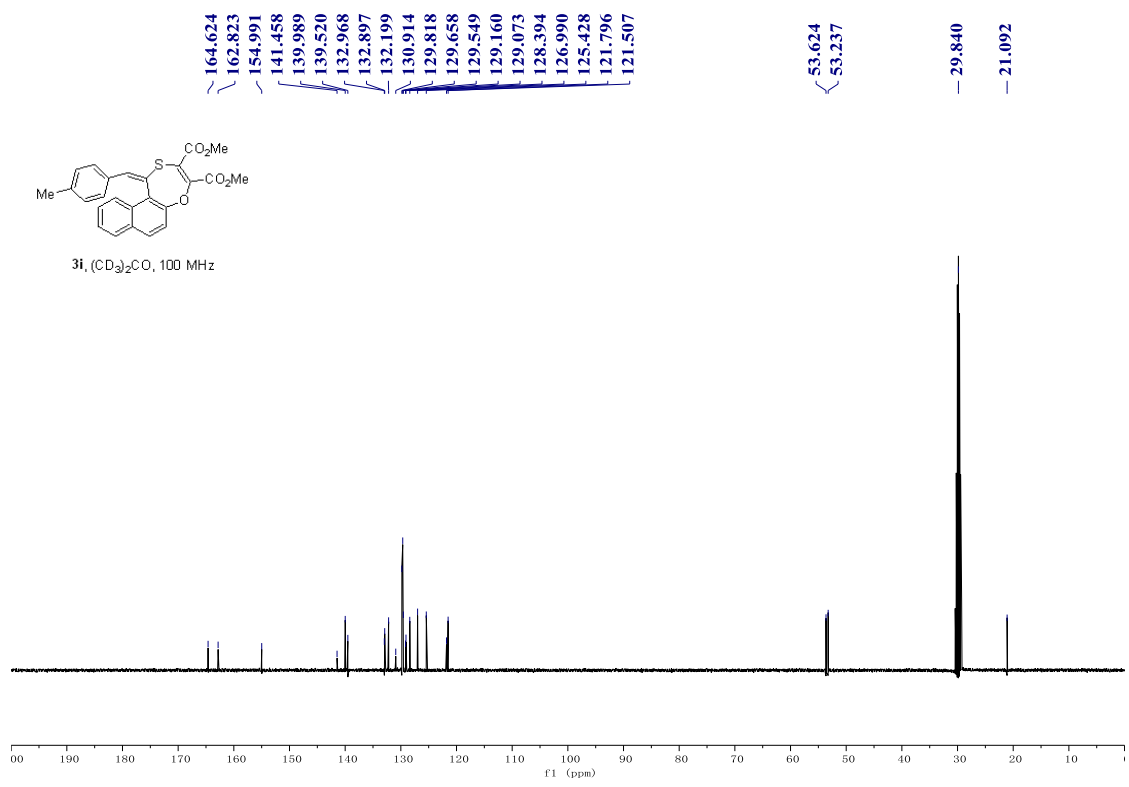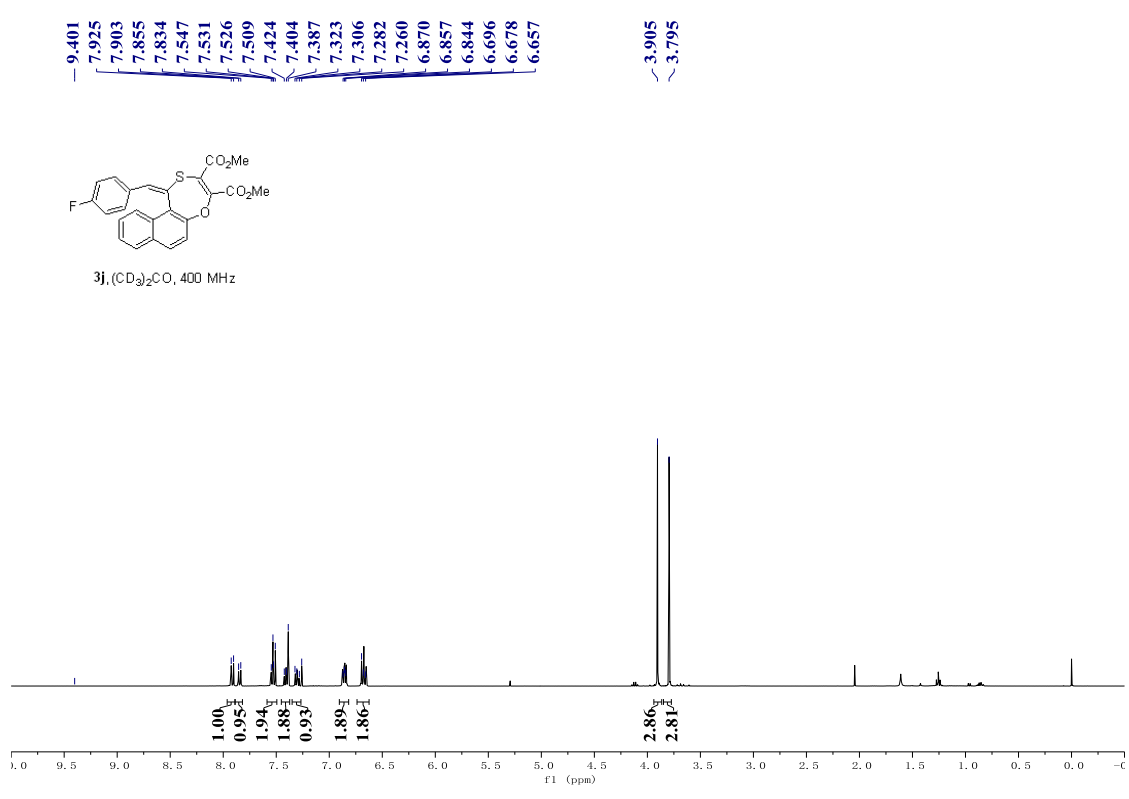

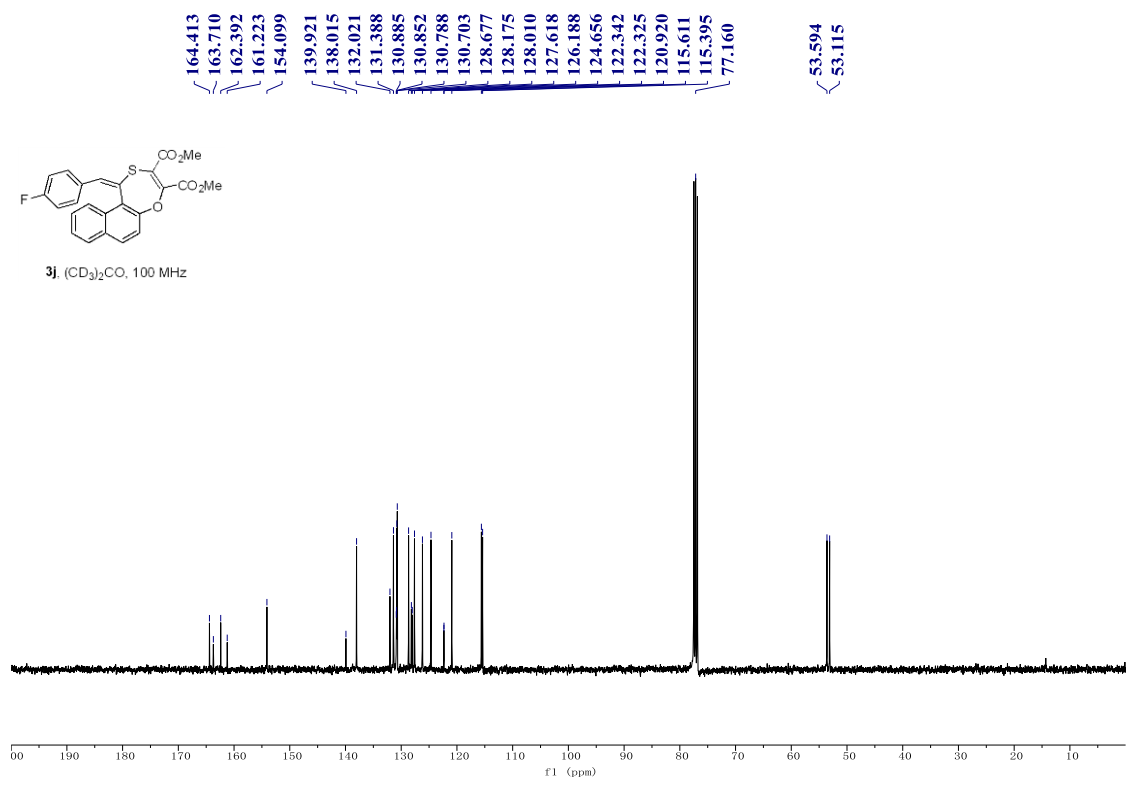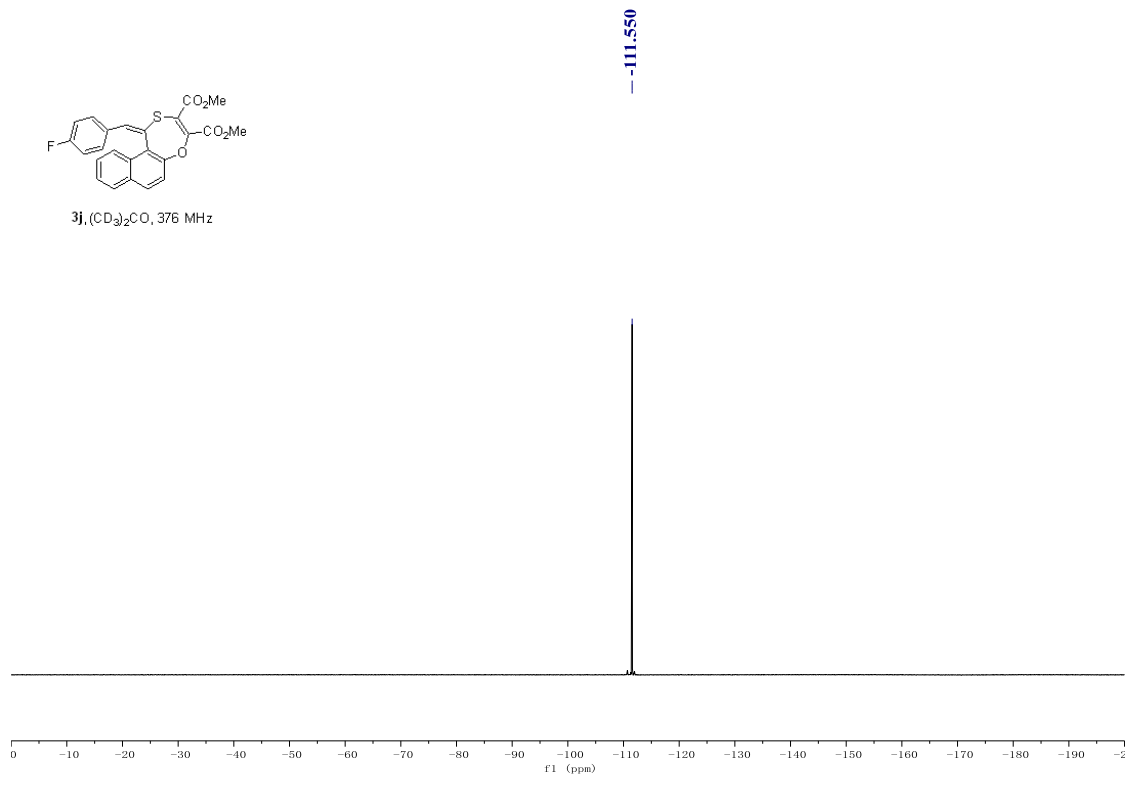

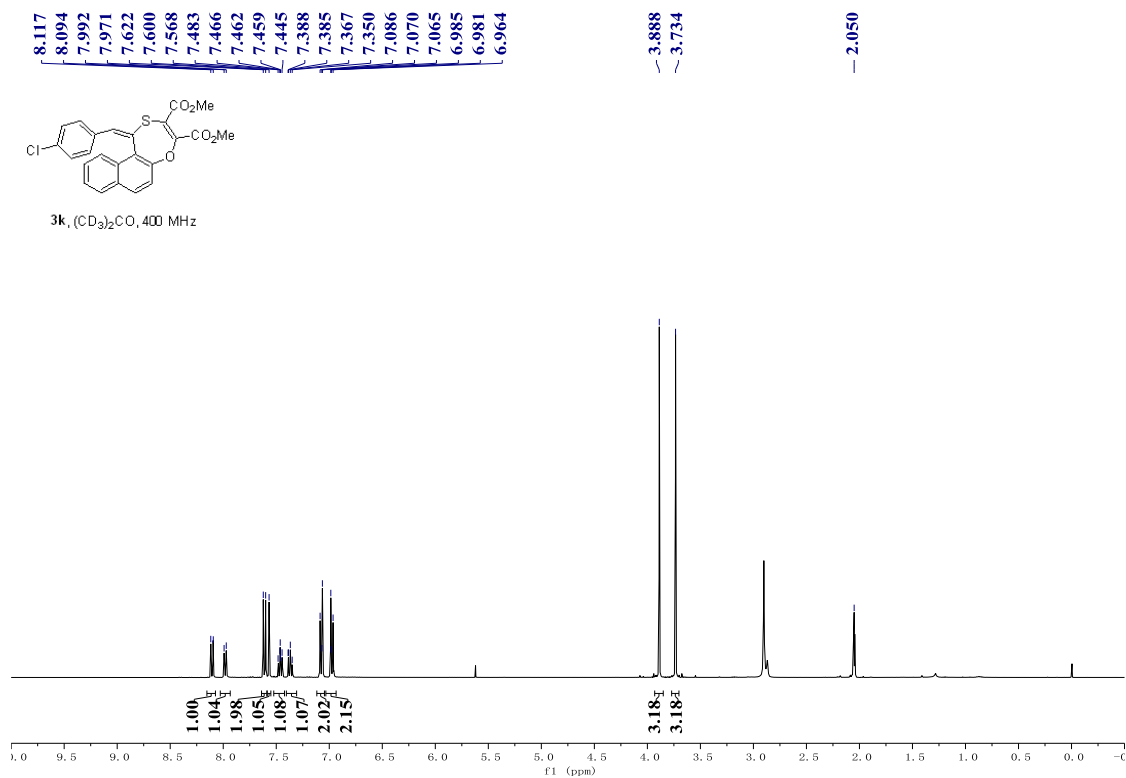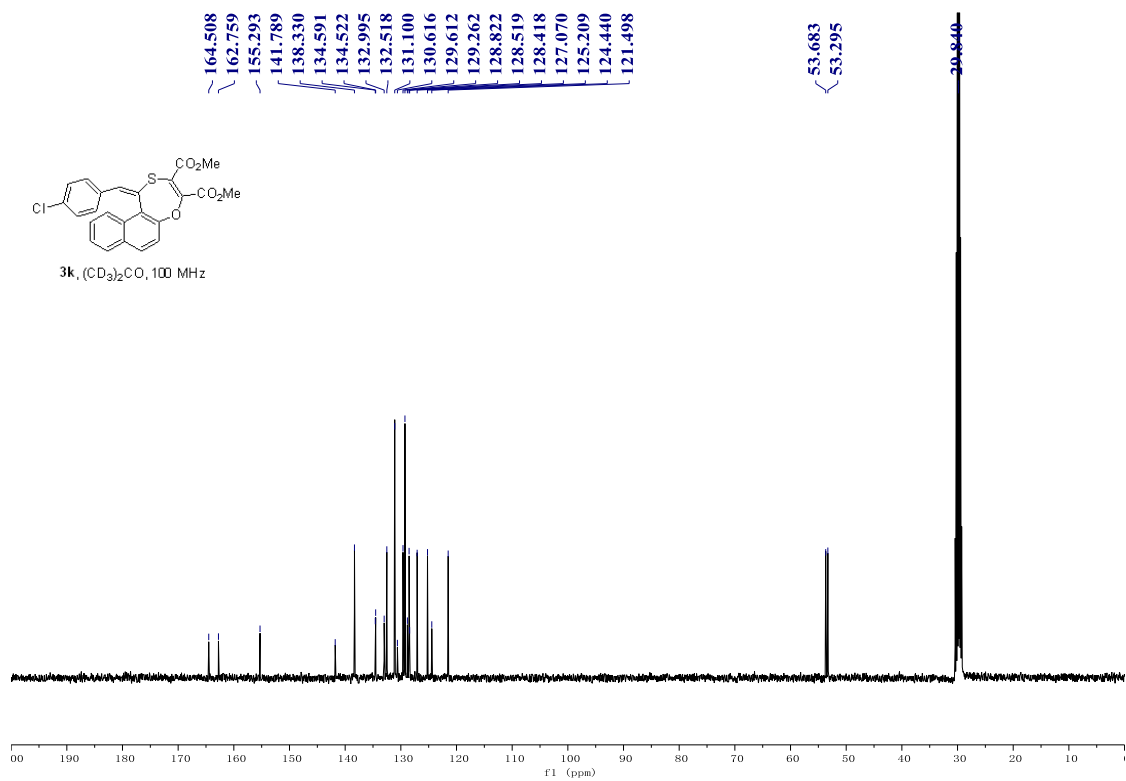

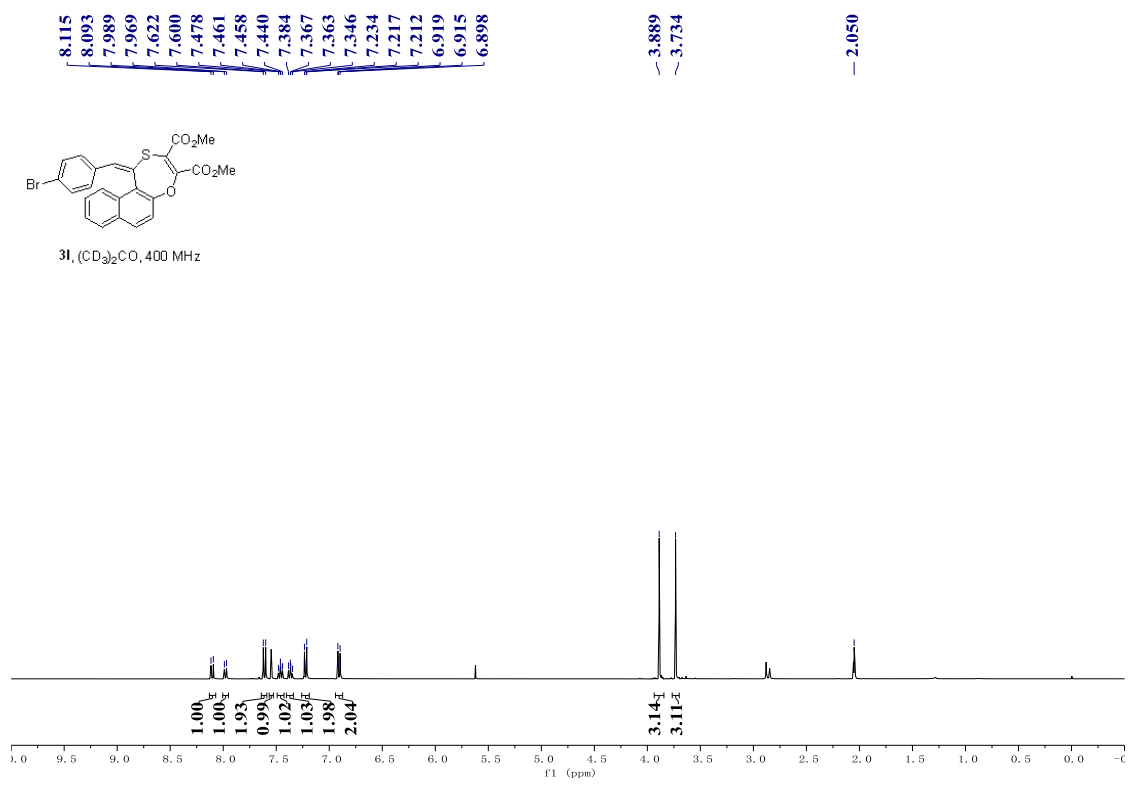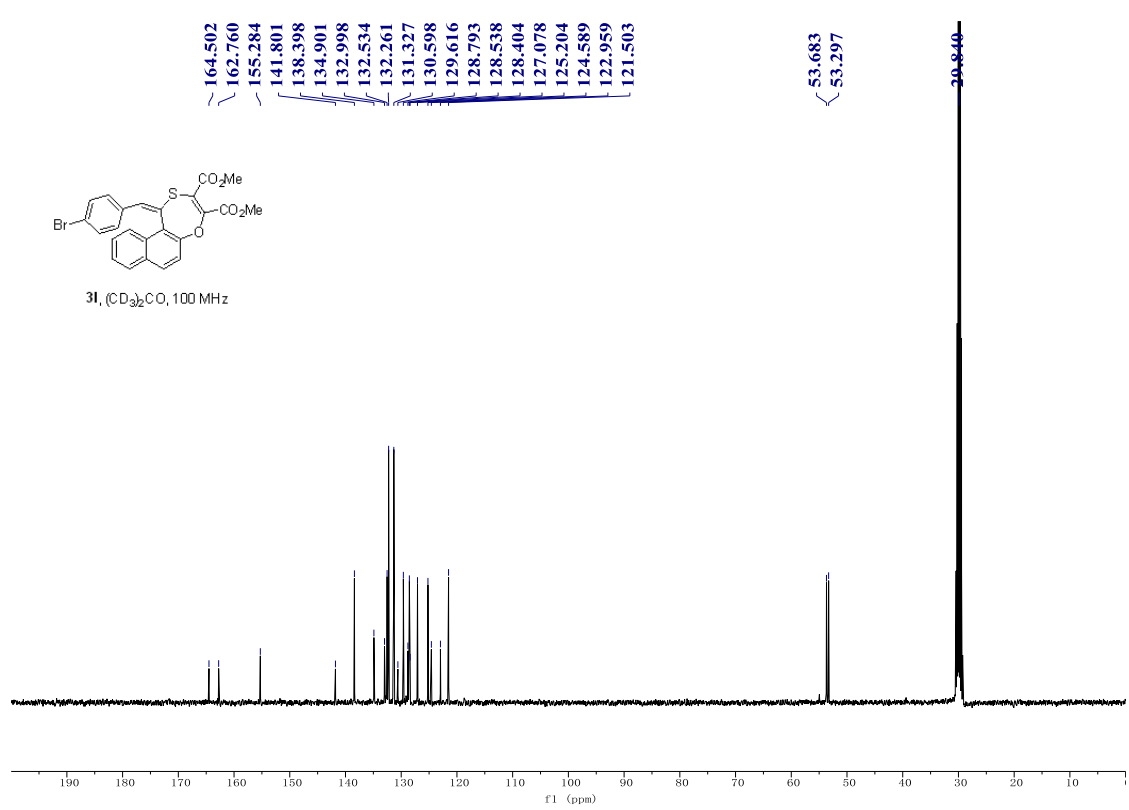

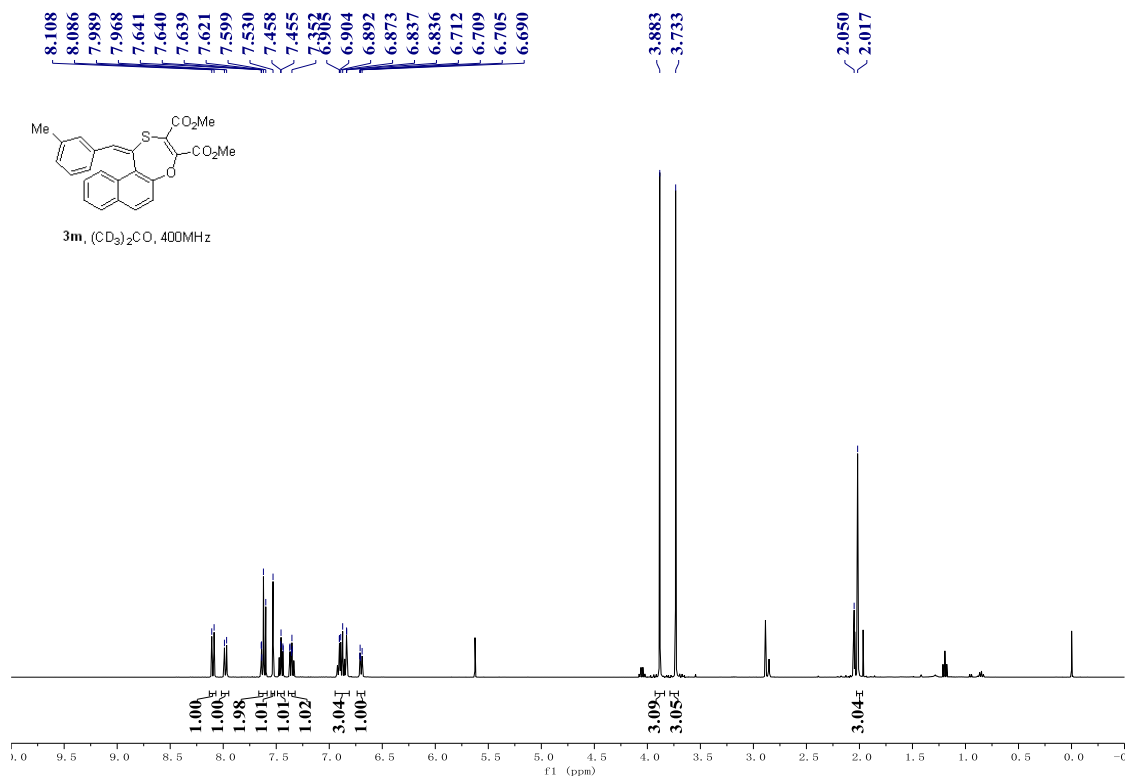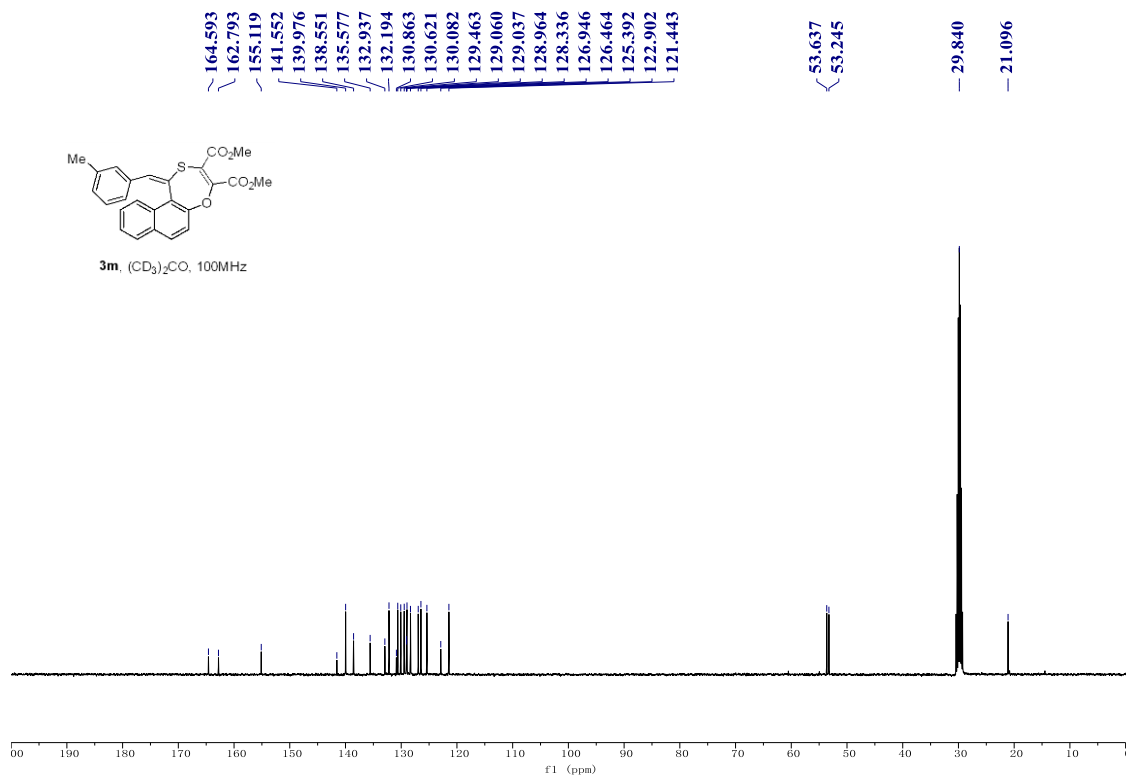

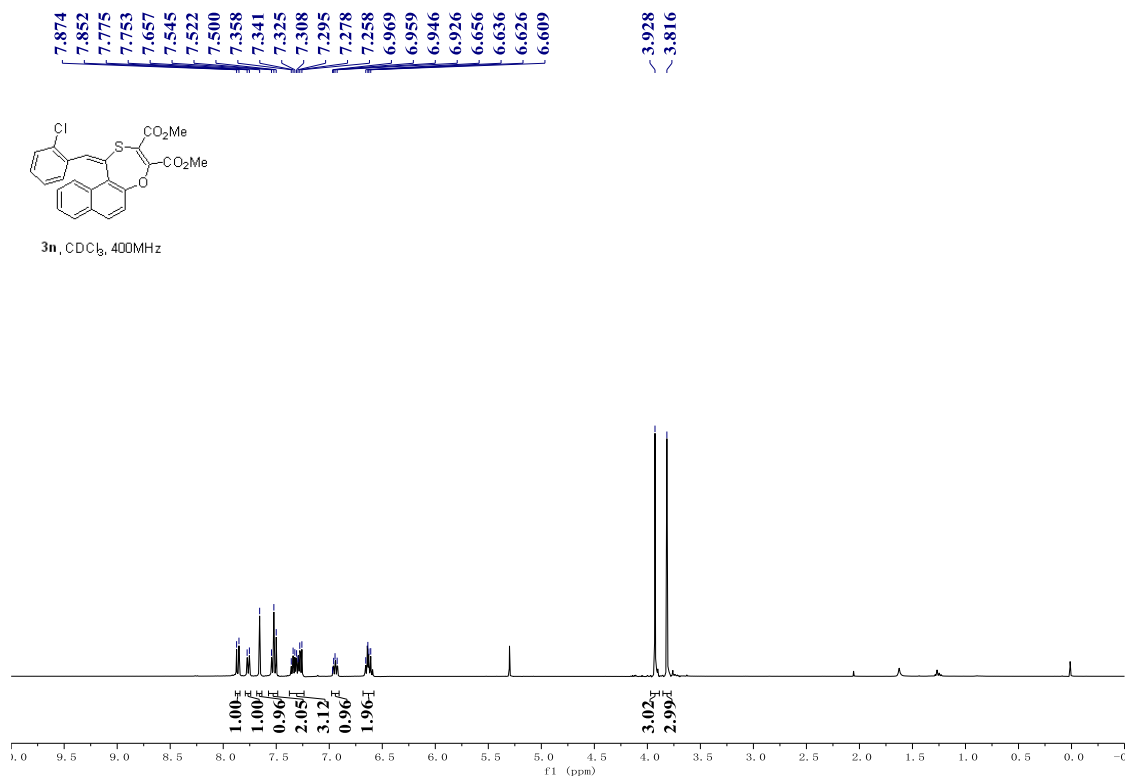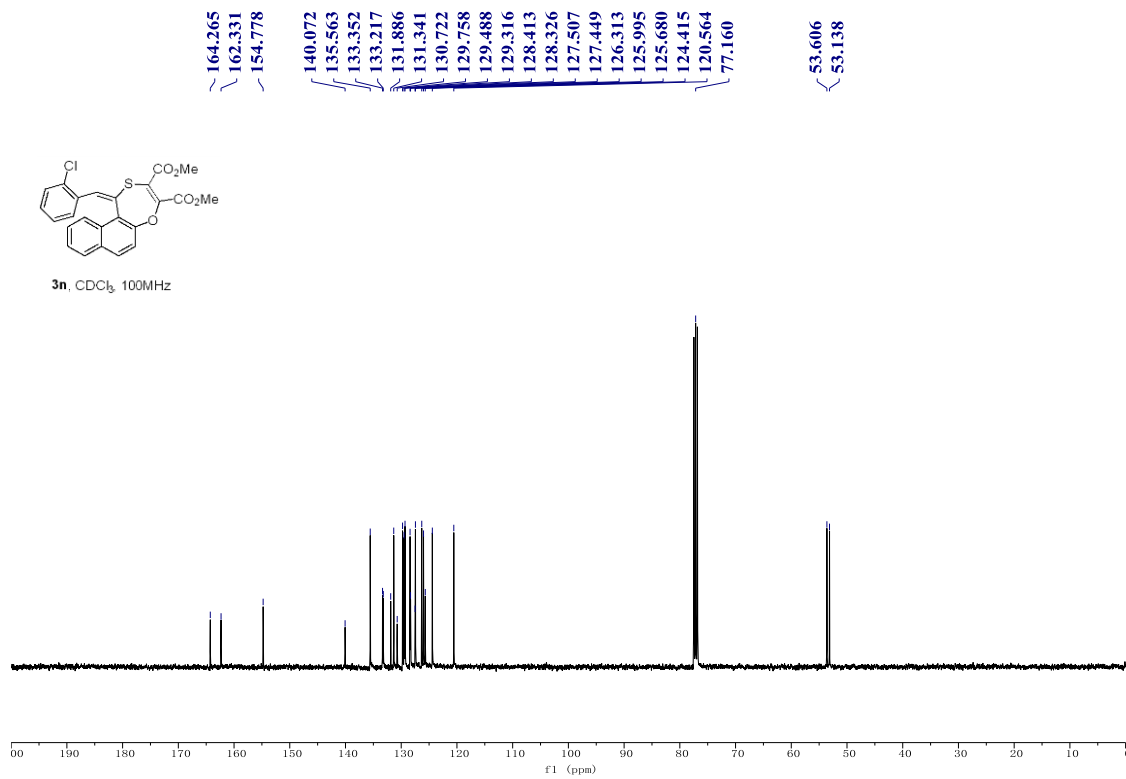

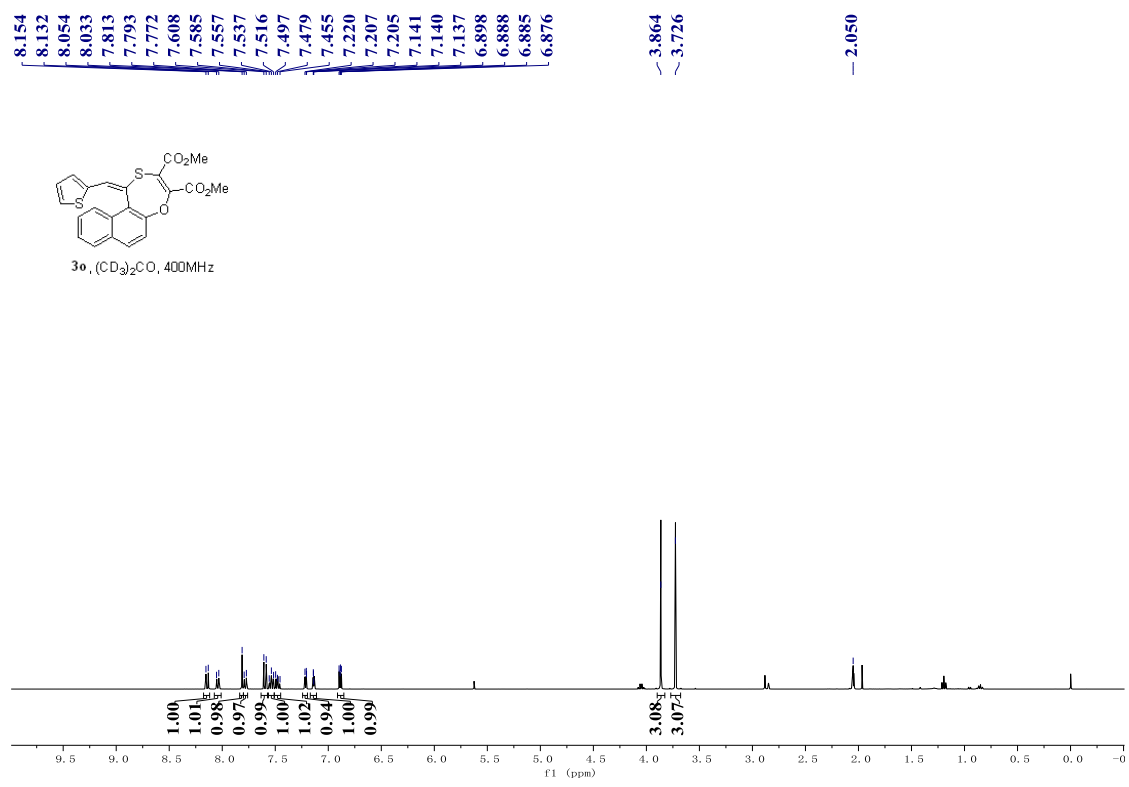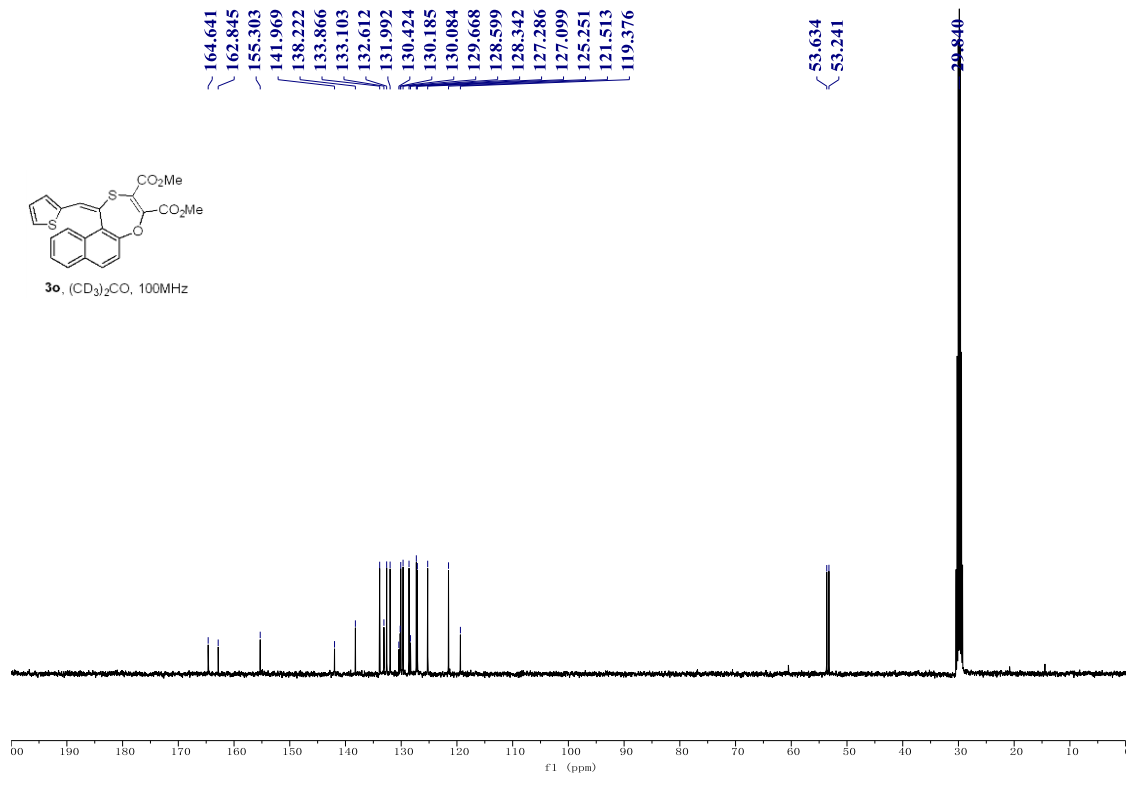



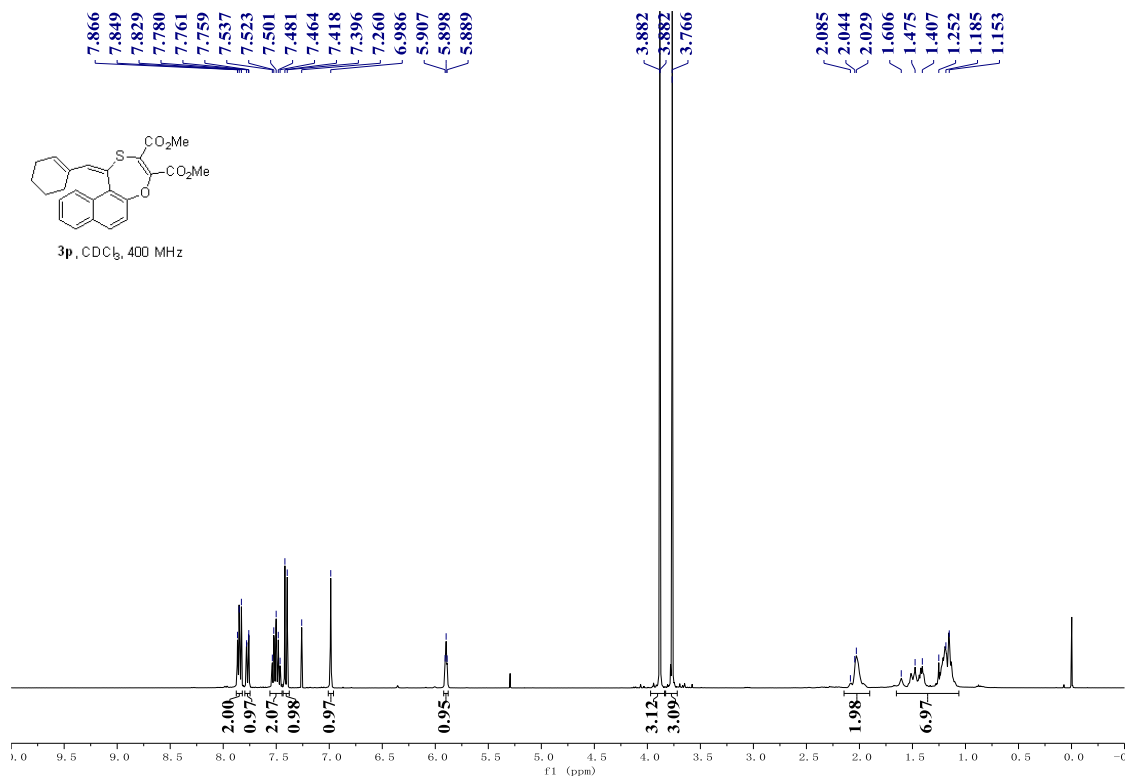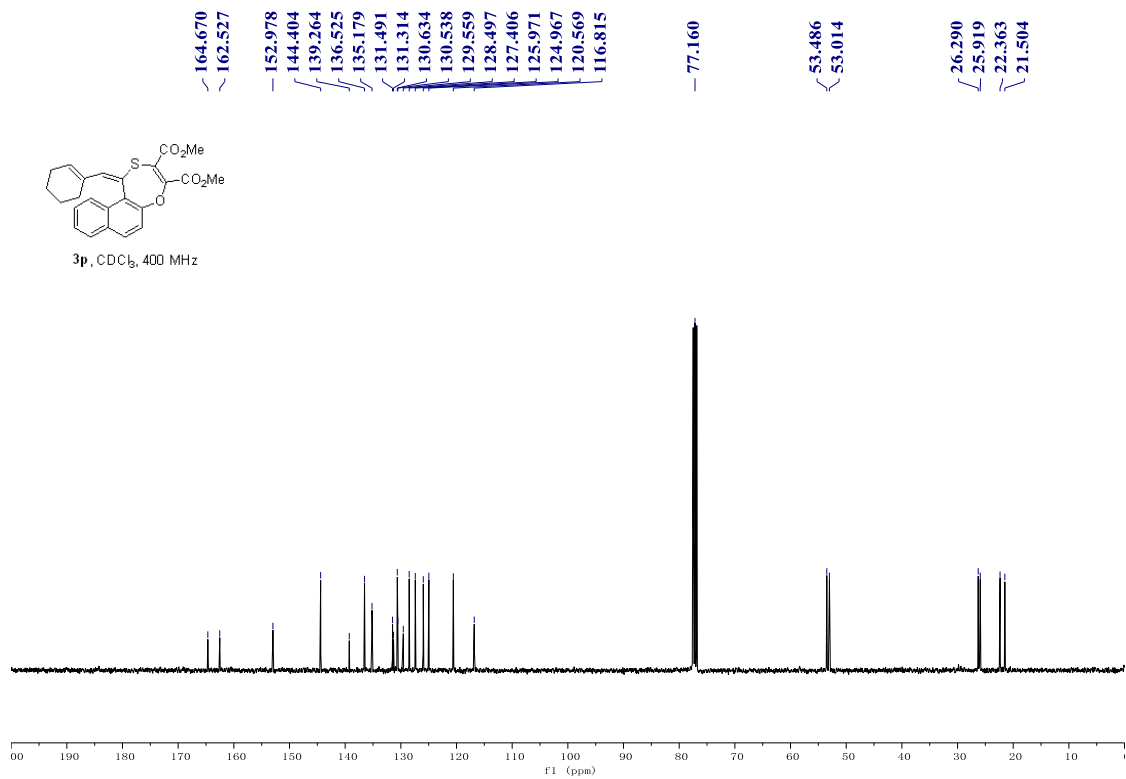

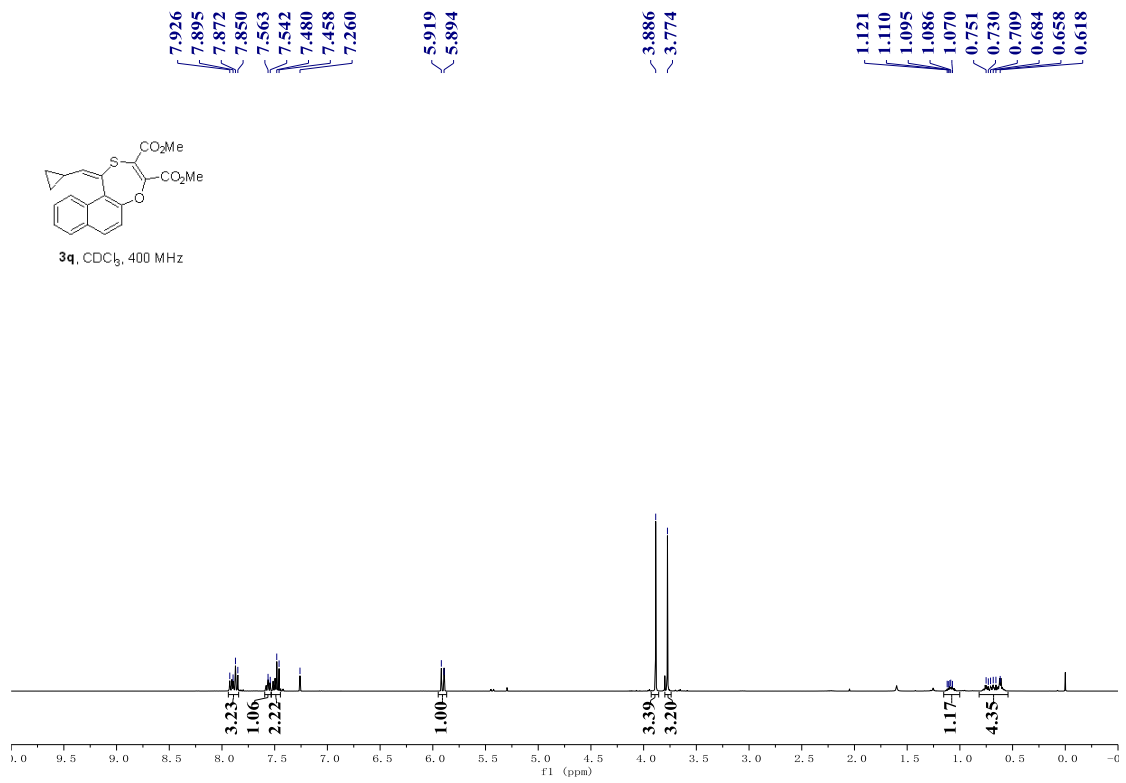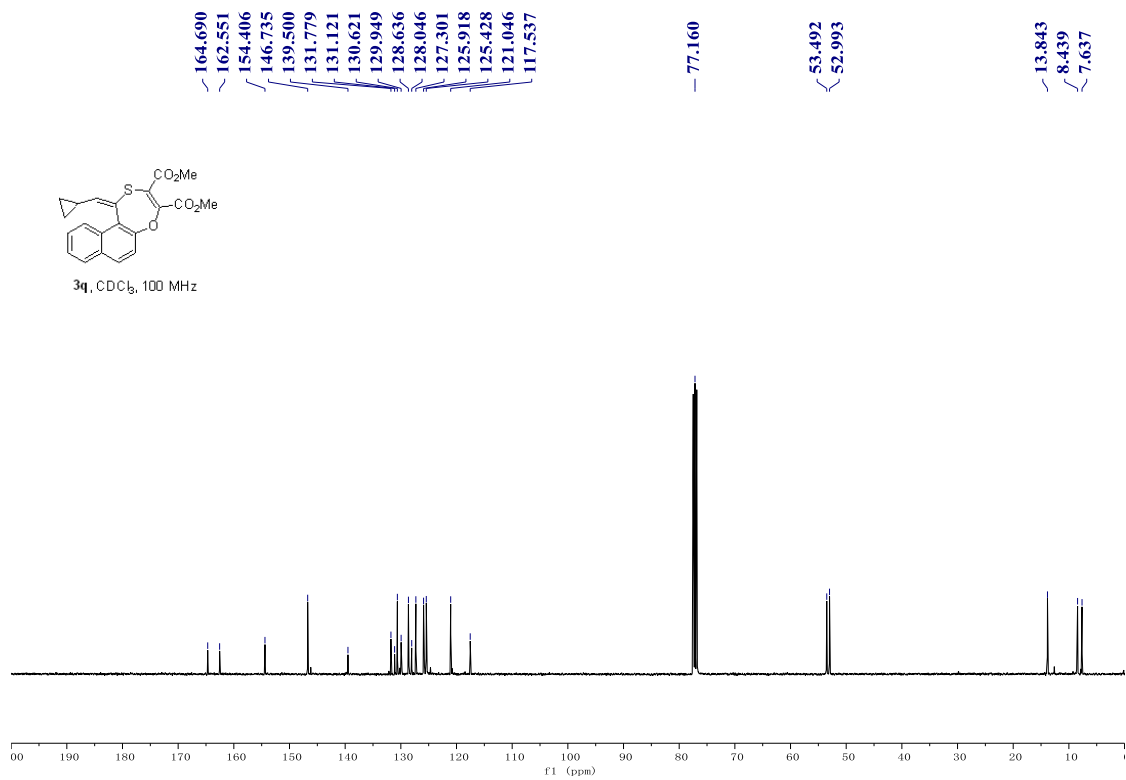

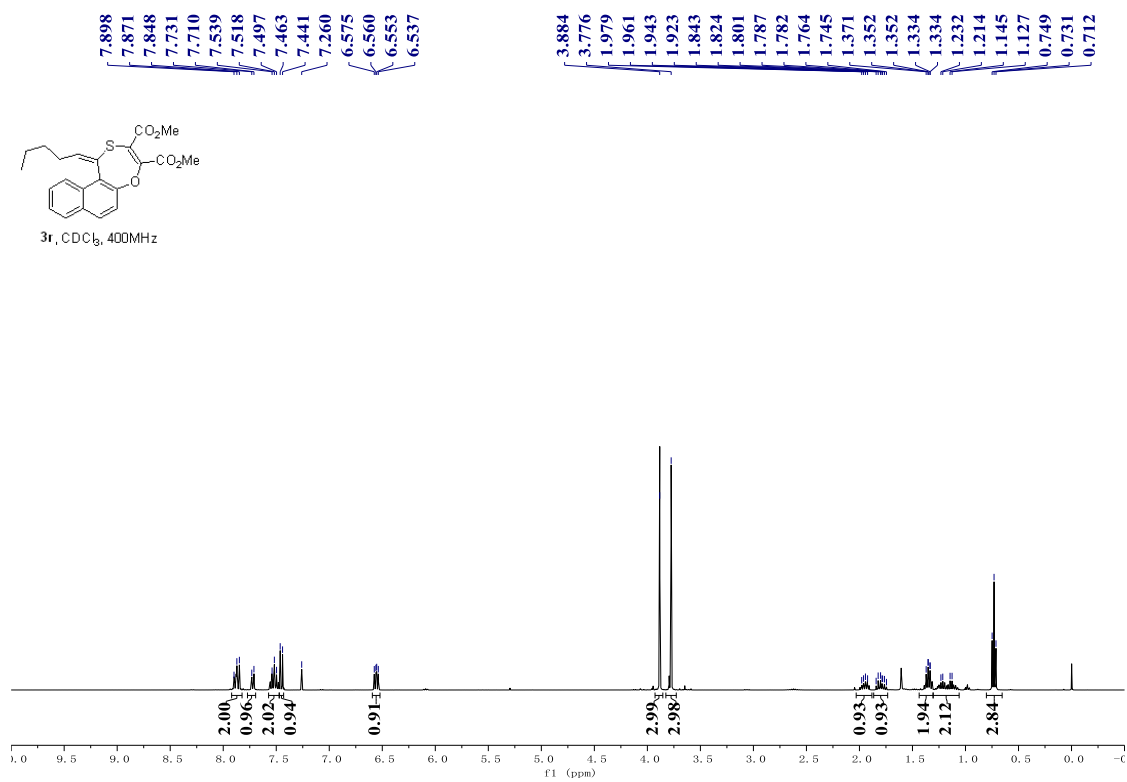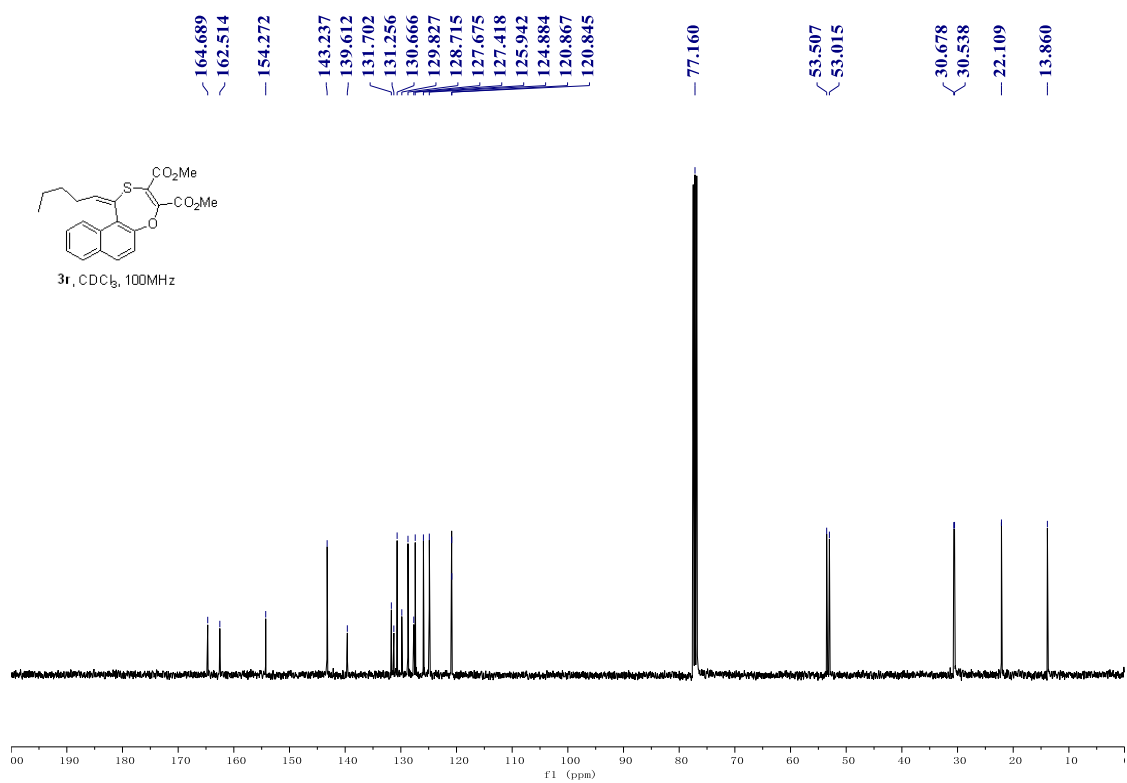

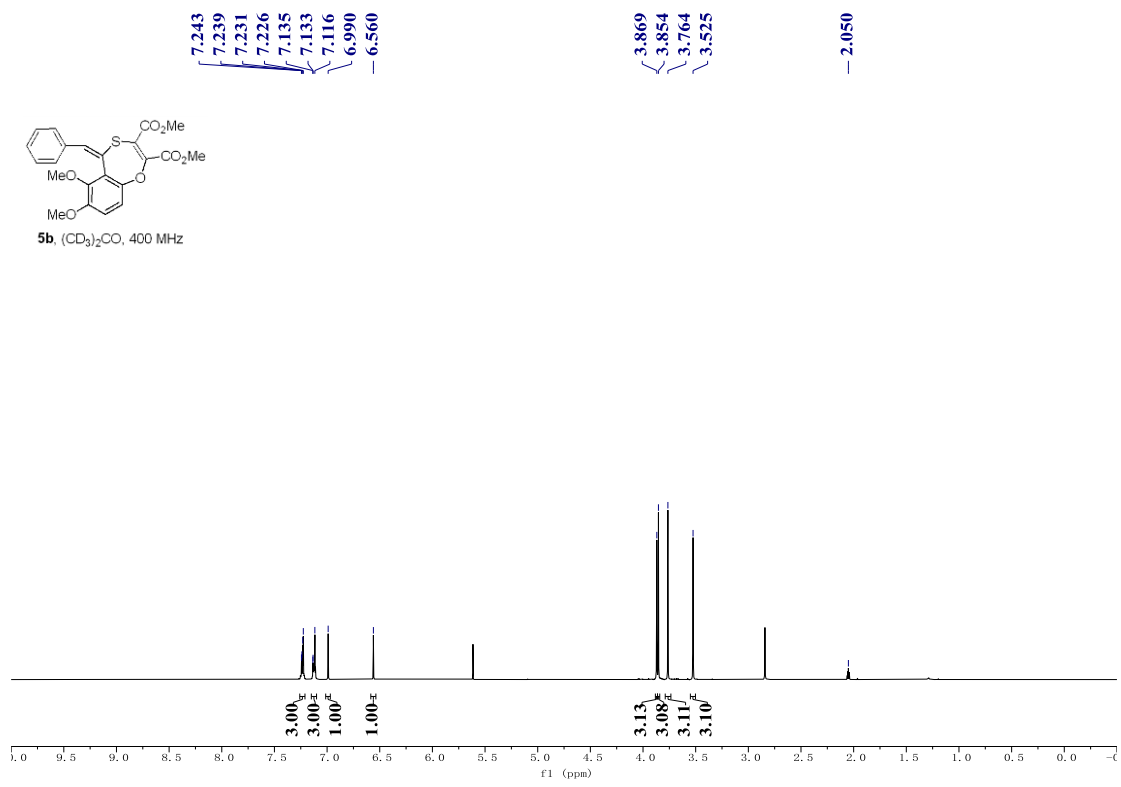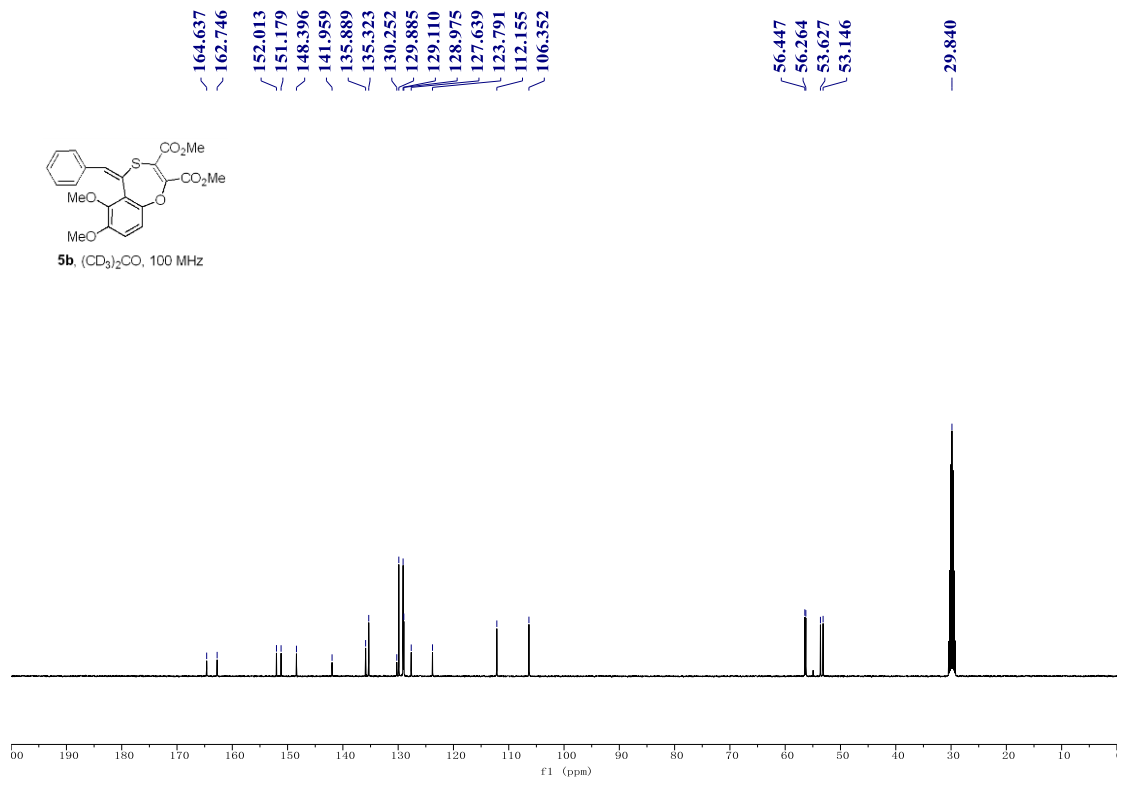

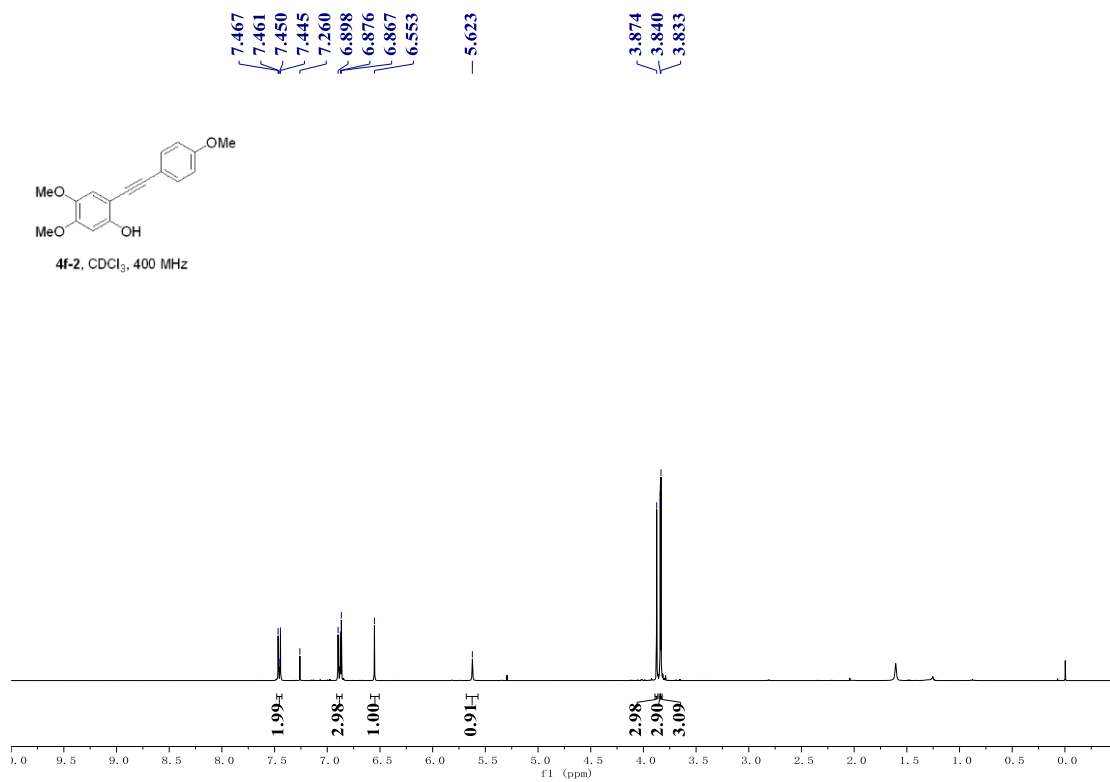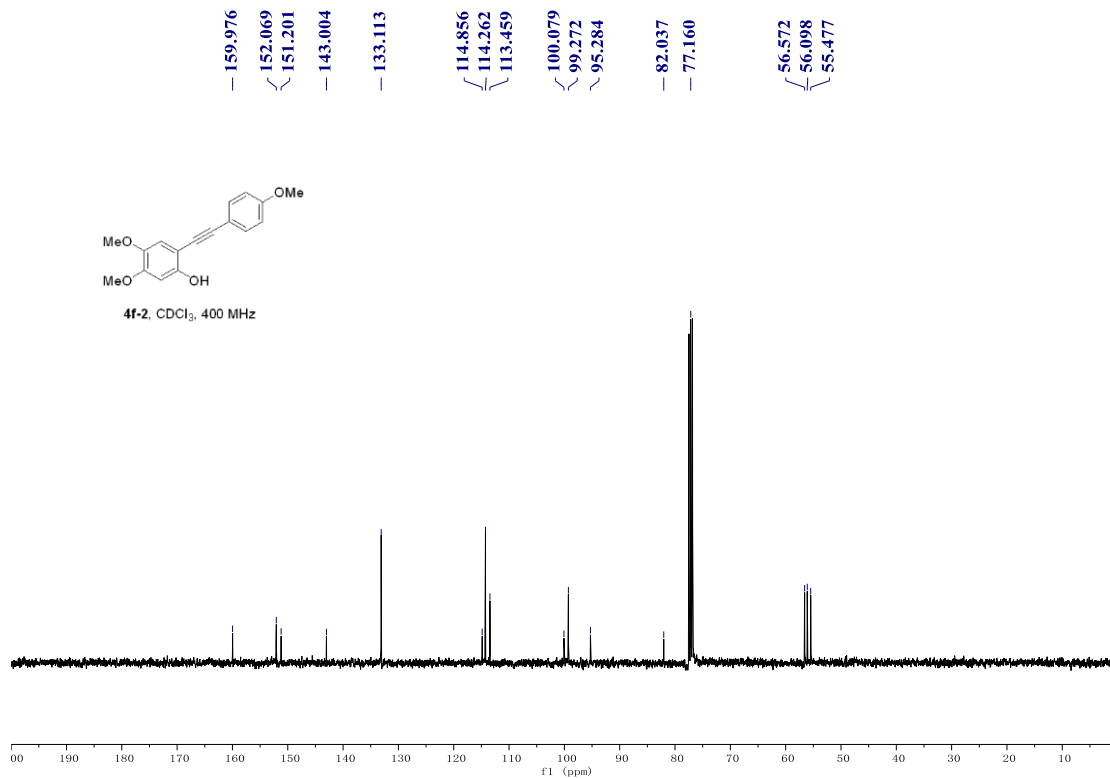

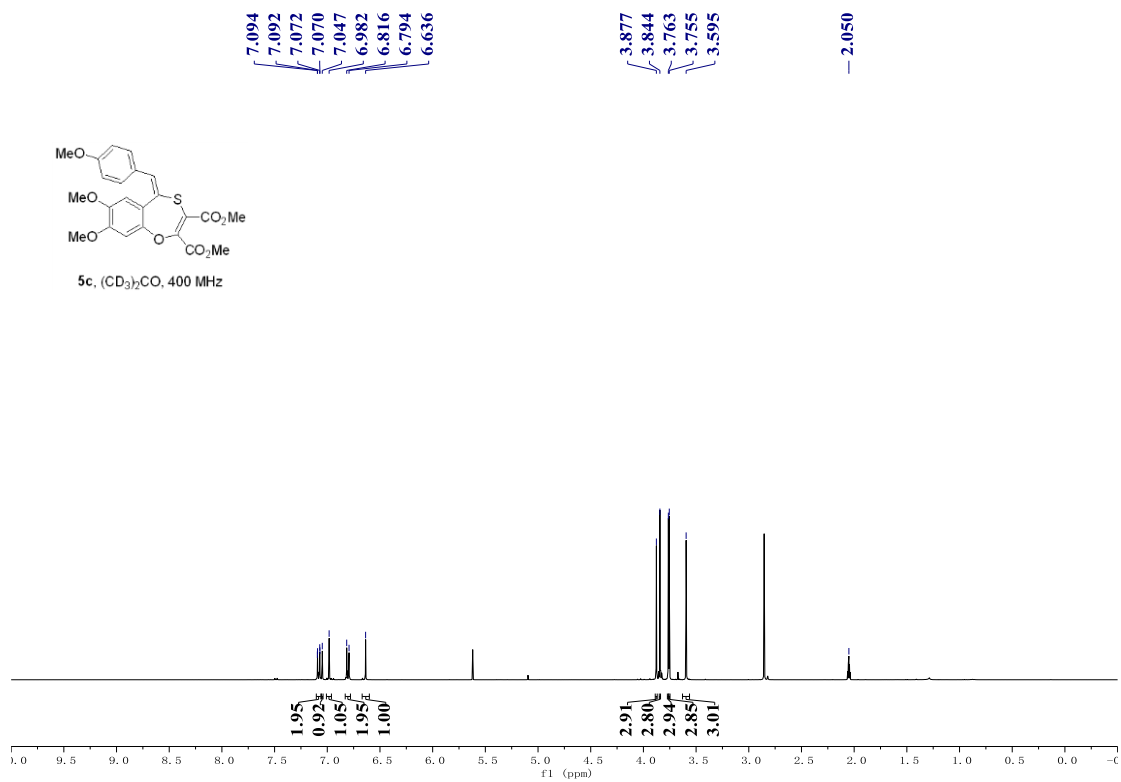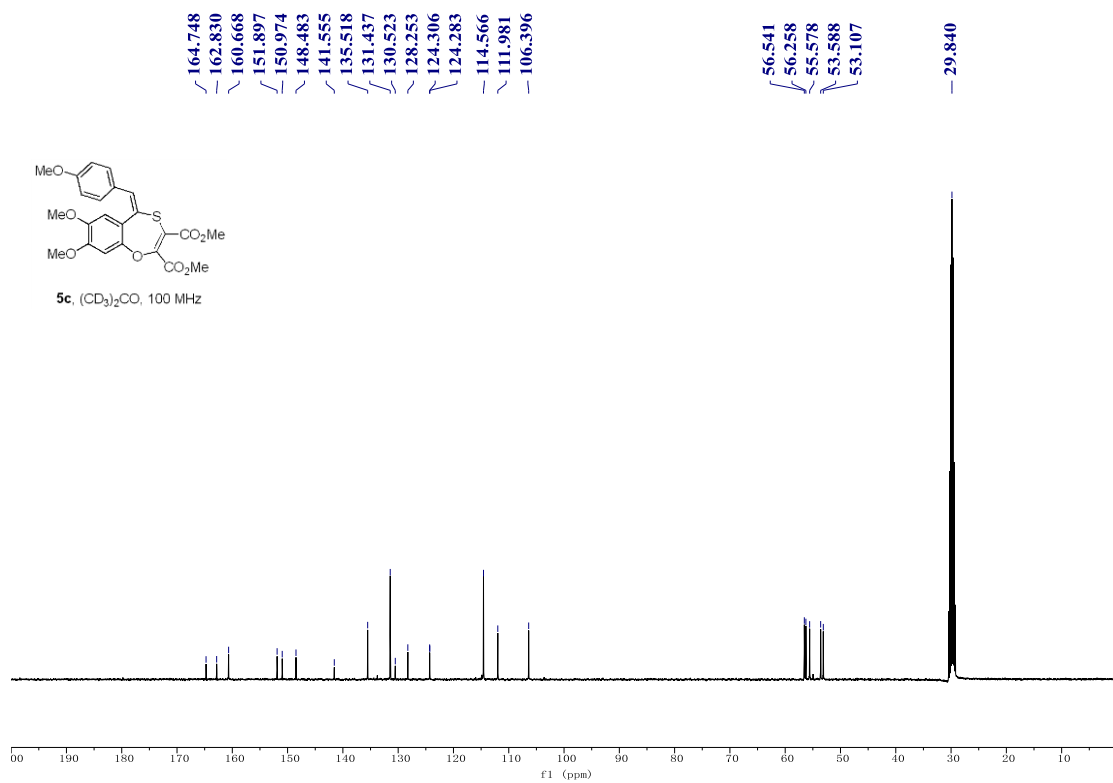

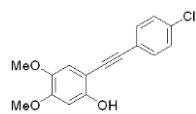

4f-3, CDCl<sub>3</sub>, 400 MHz

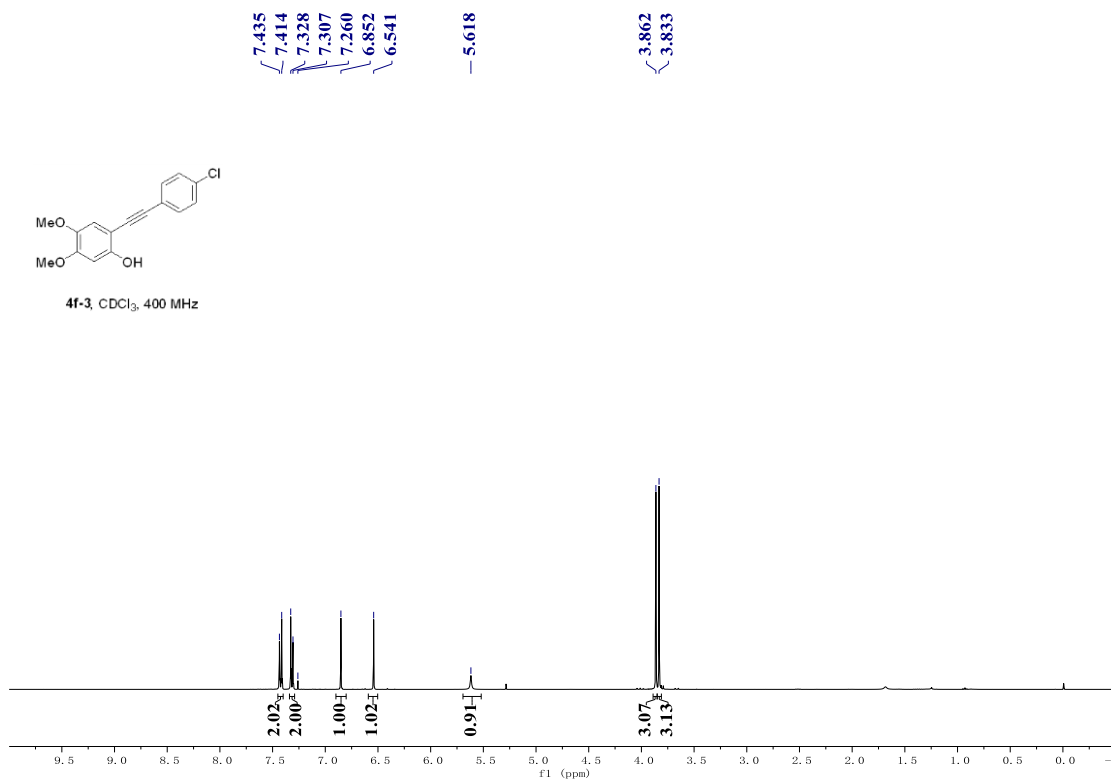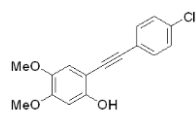

4f-3, CDCl<sub>3</sub>, 400 MHz

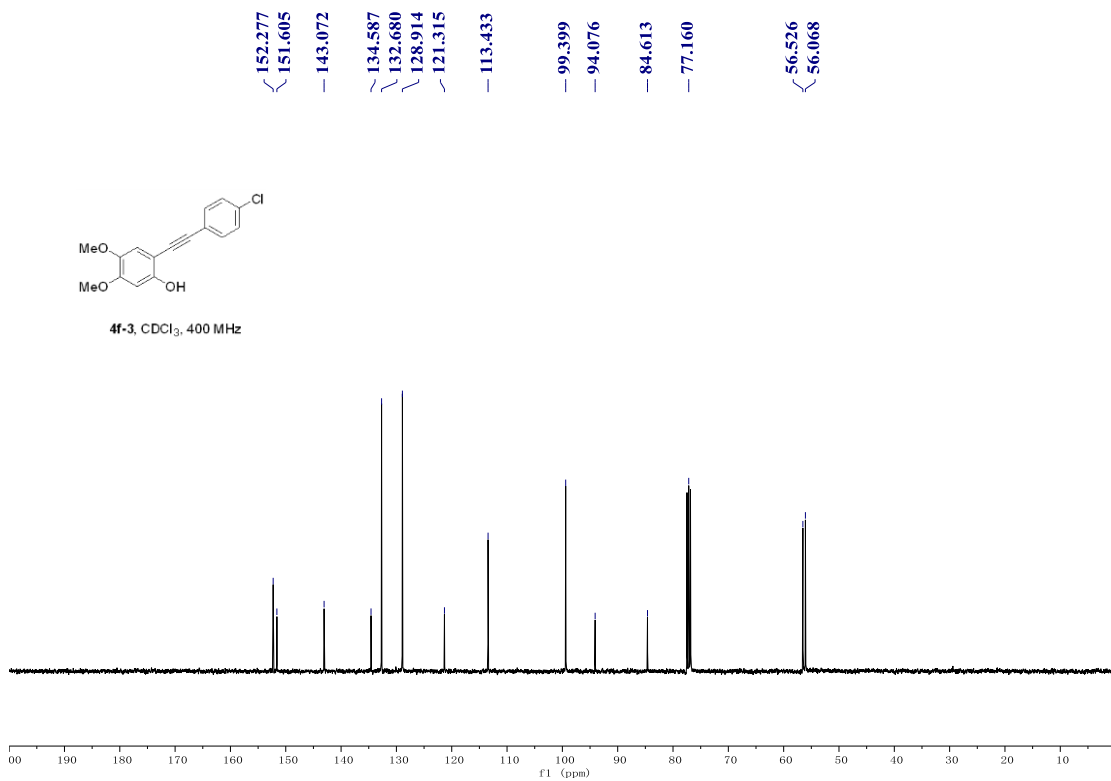

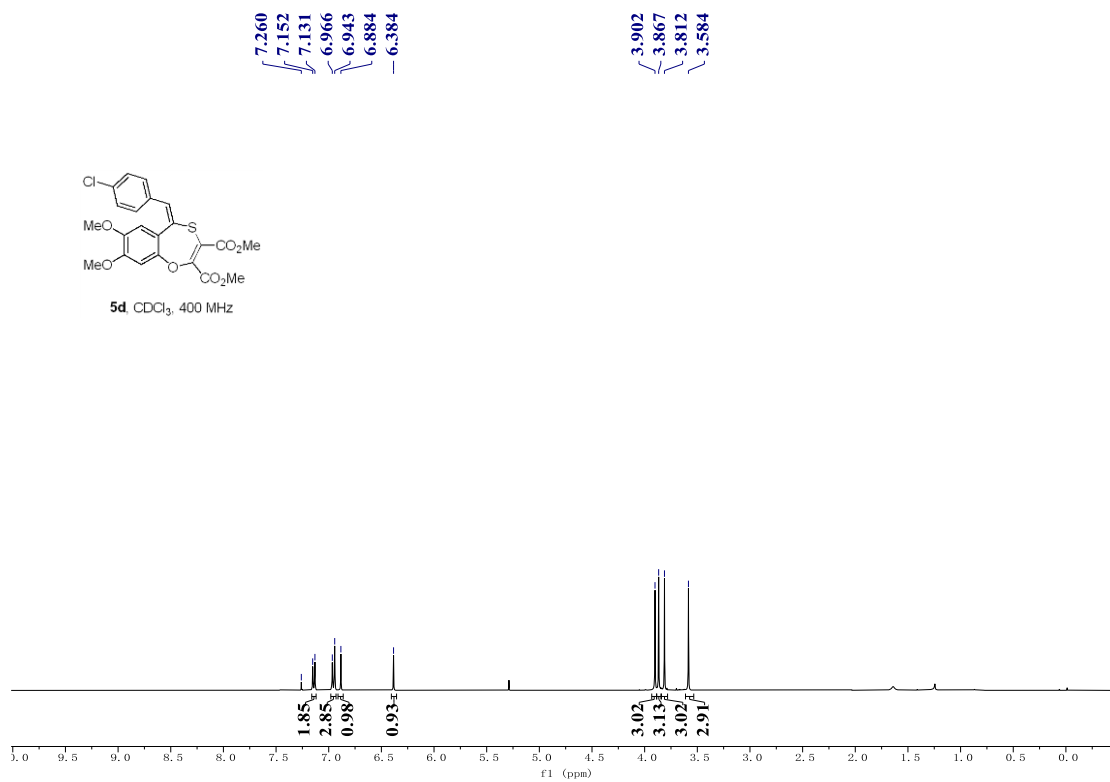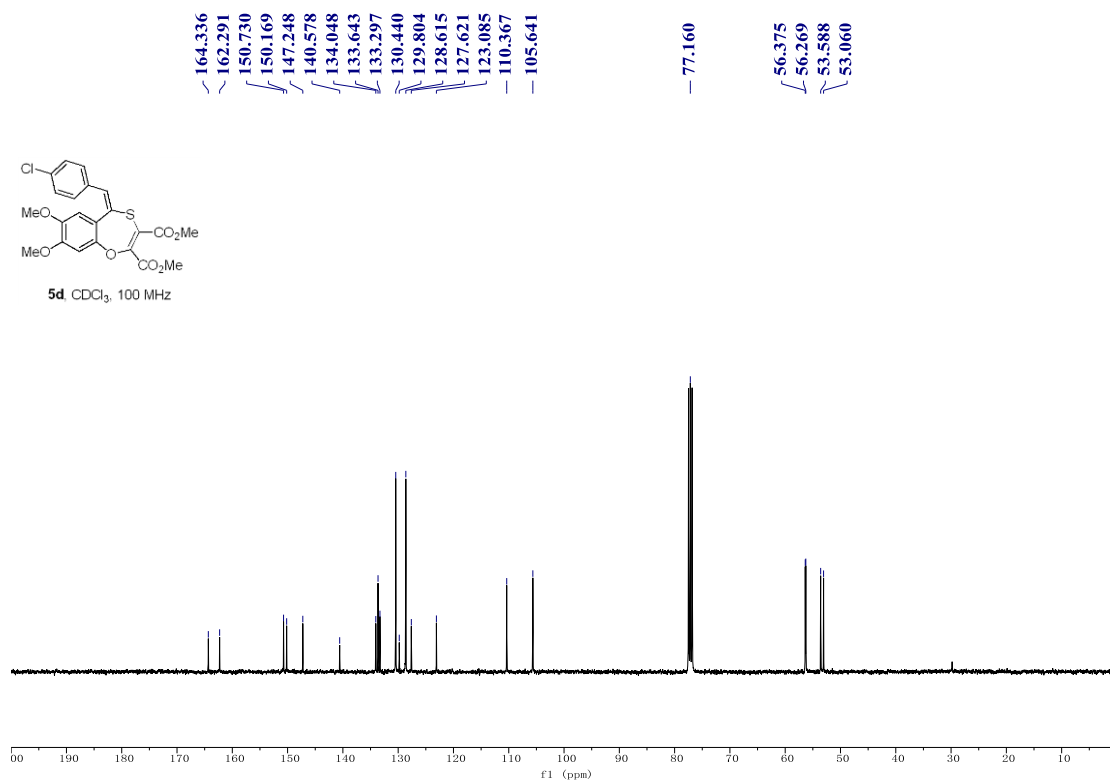



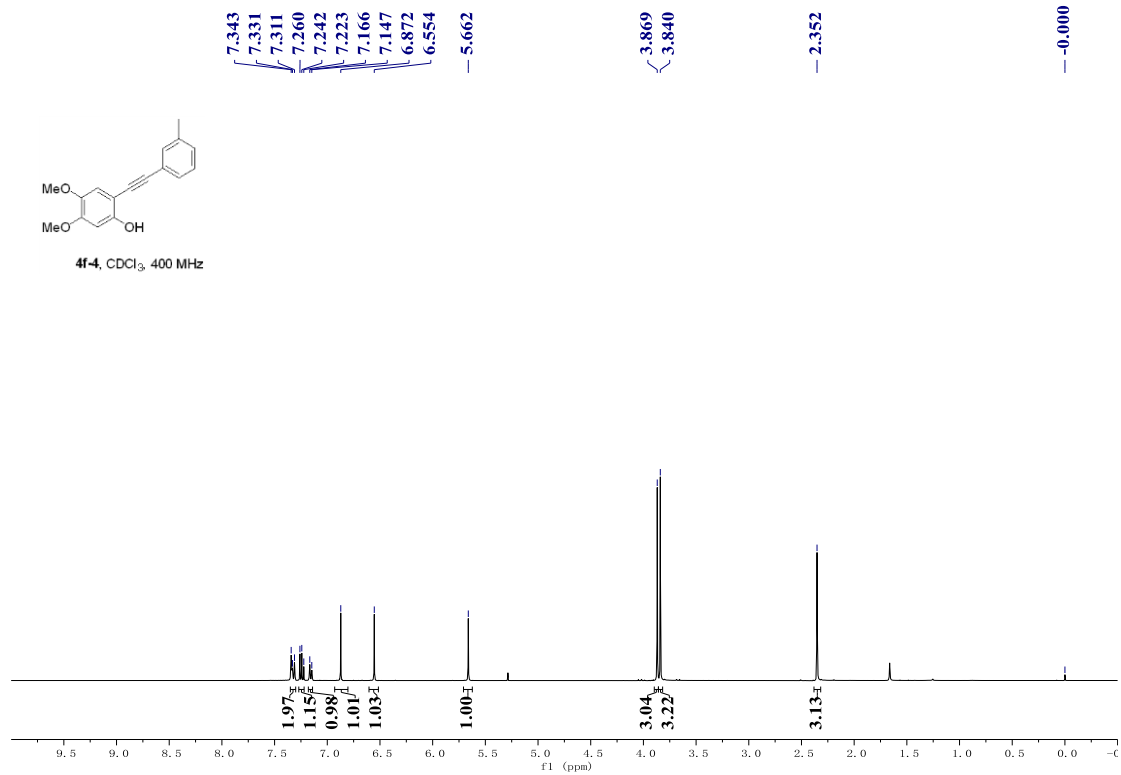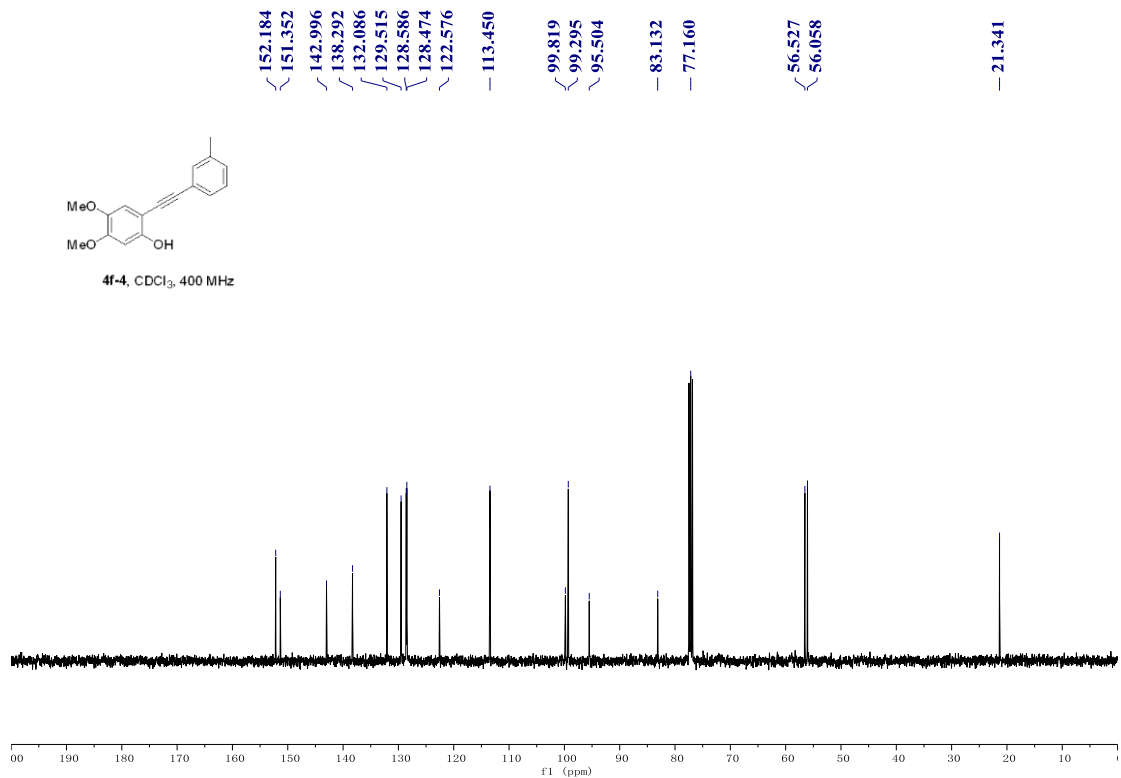

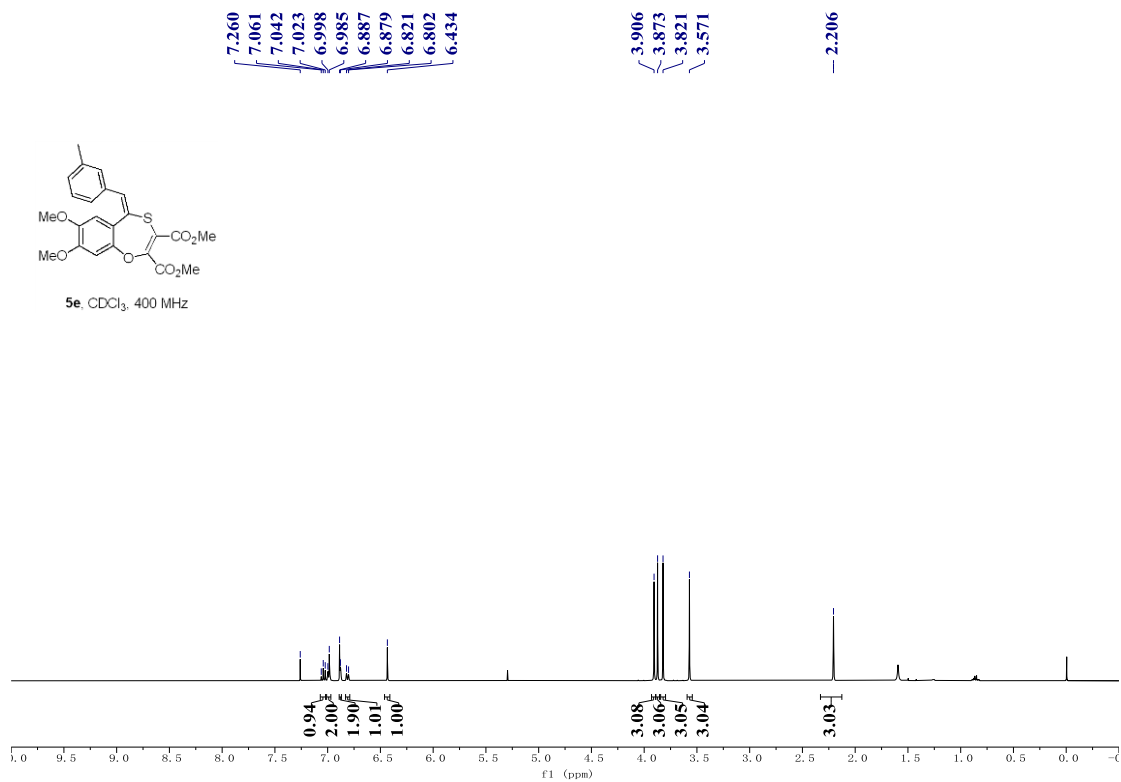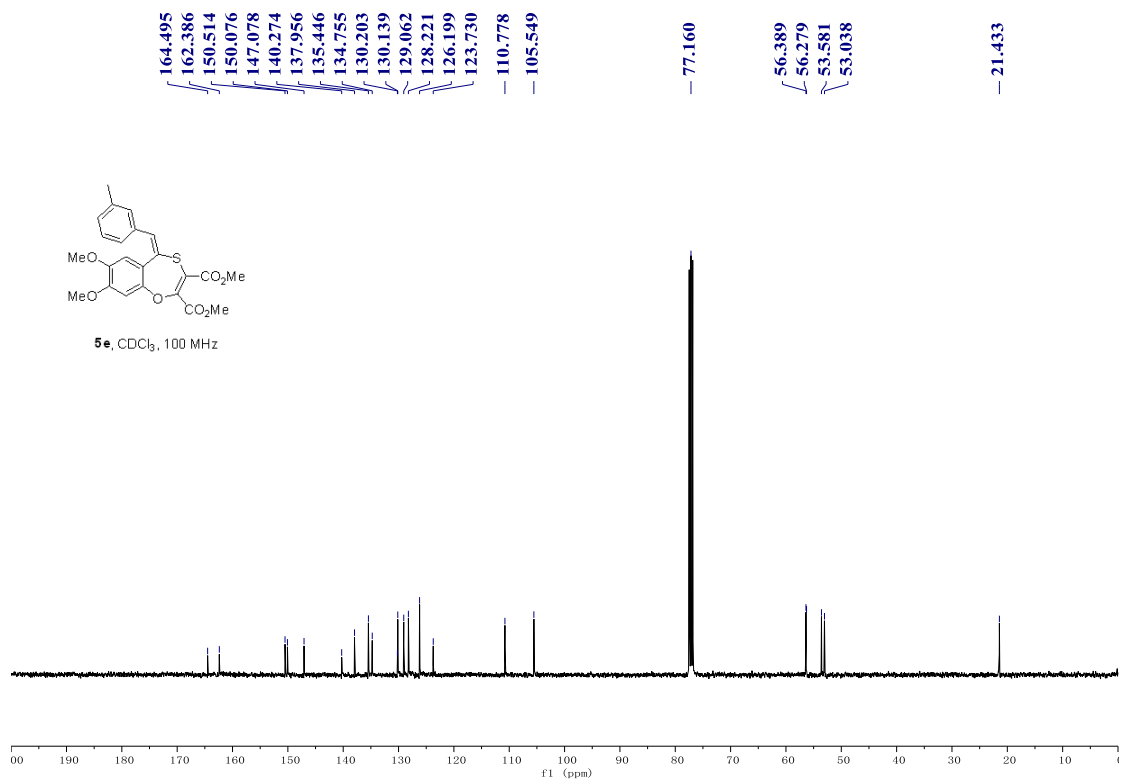

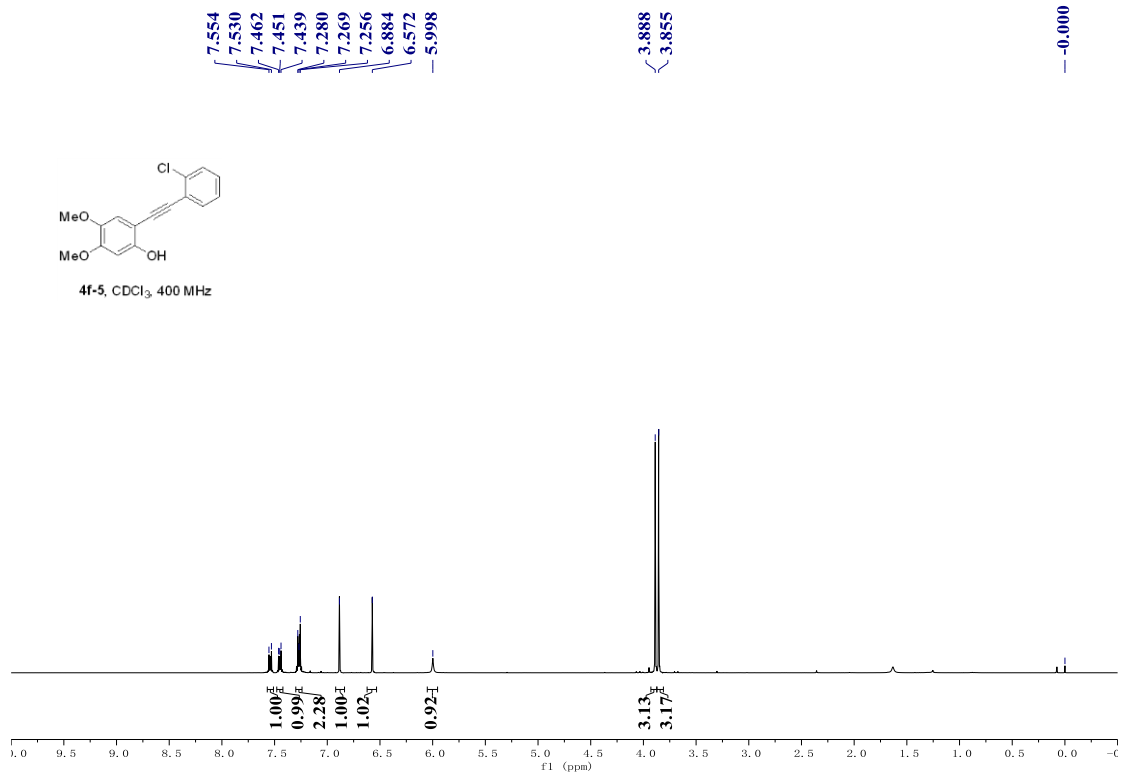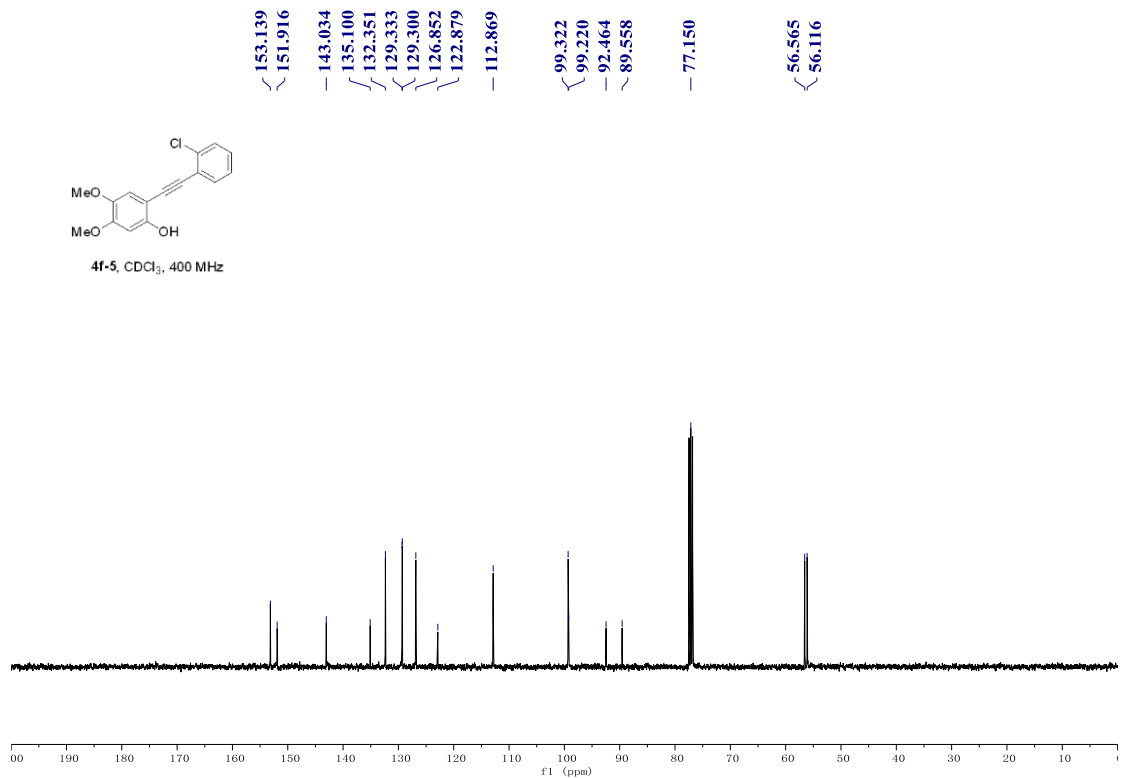

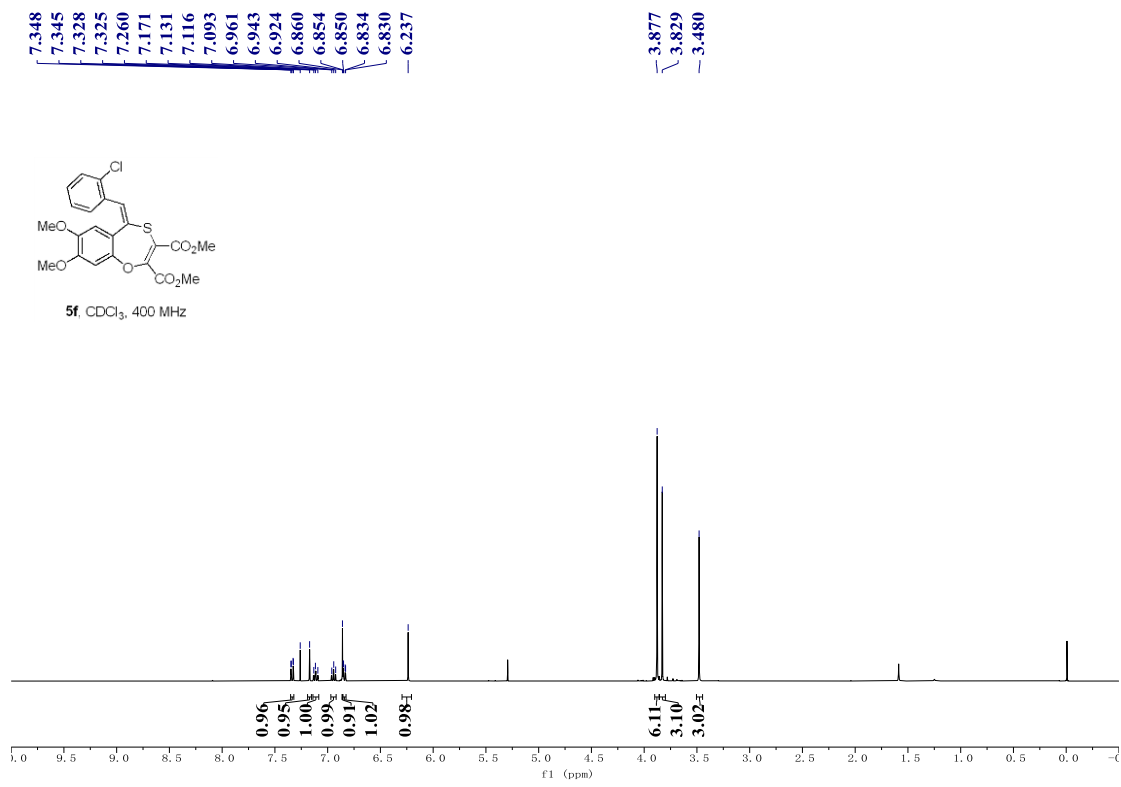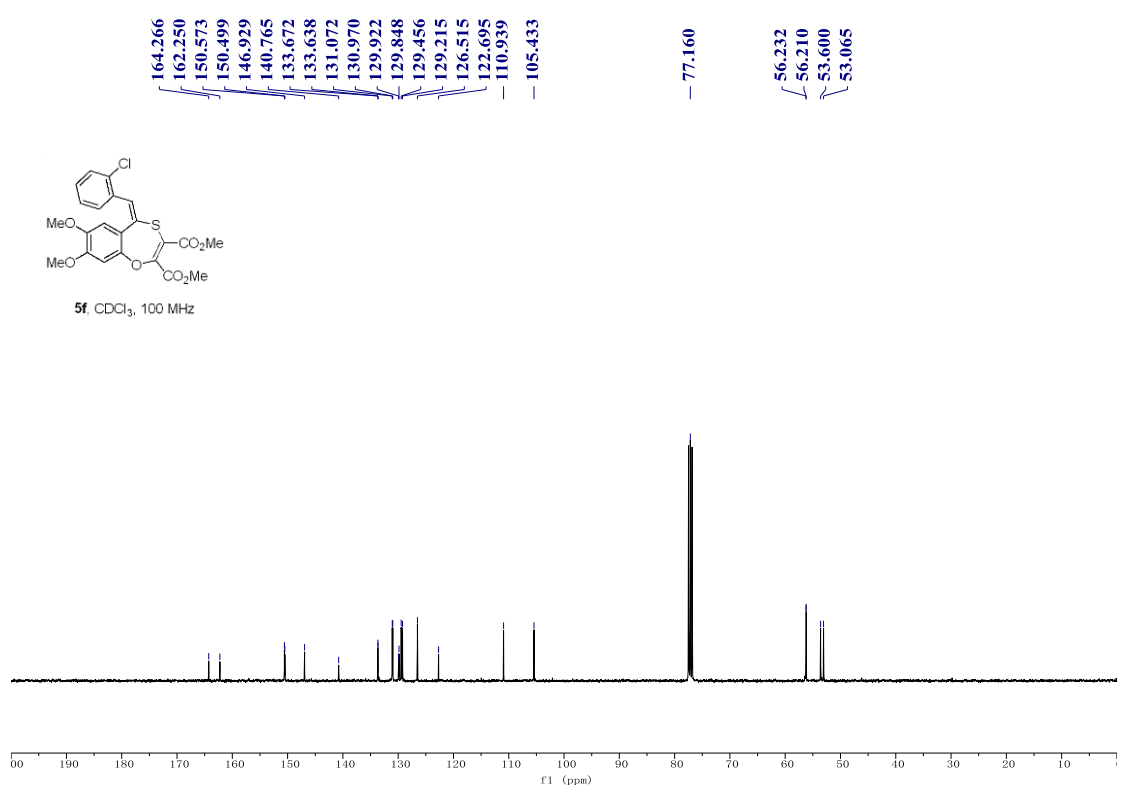

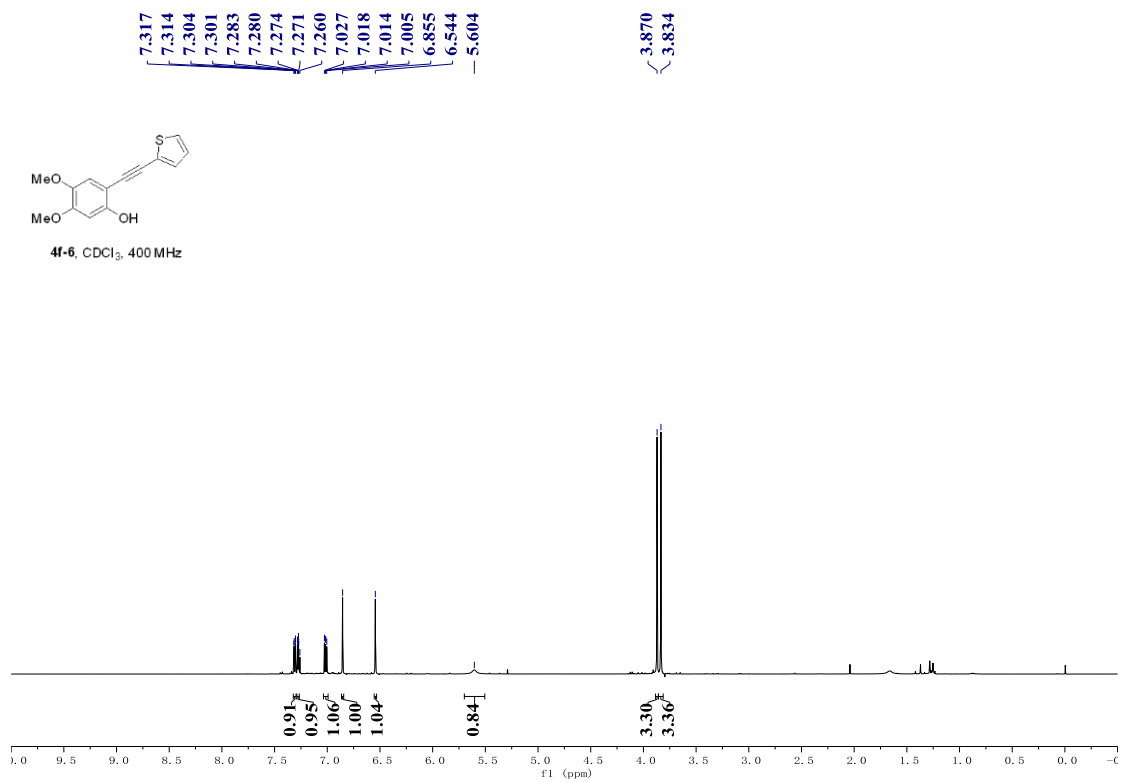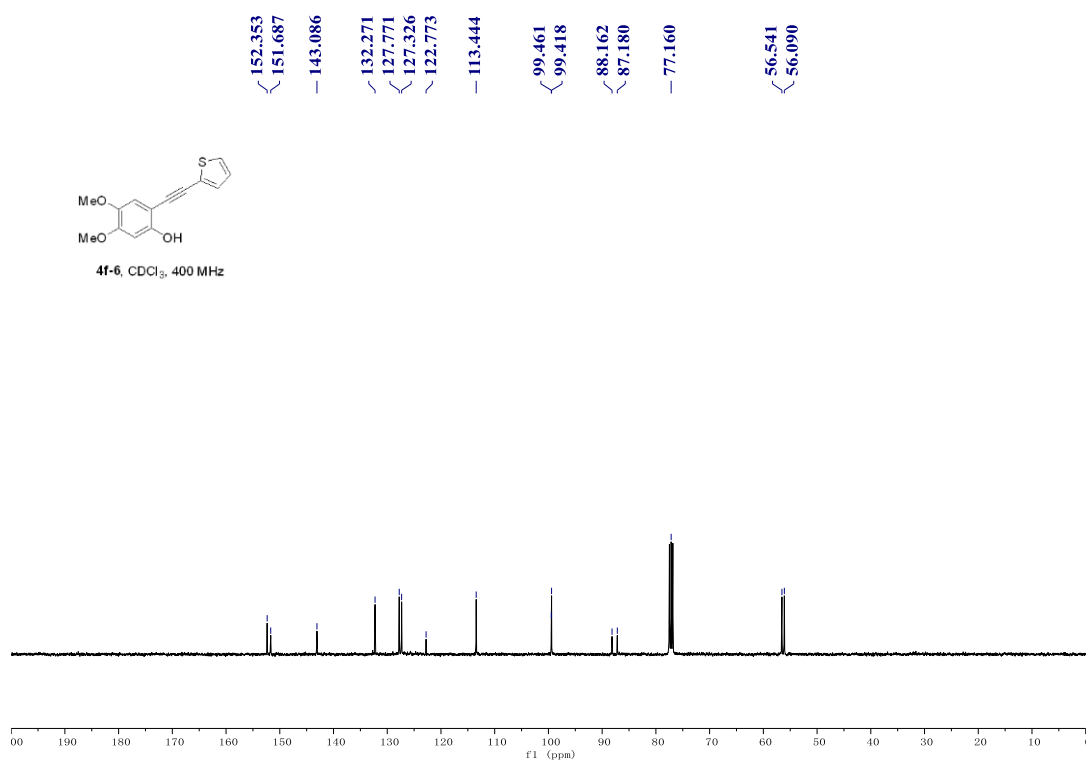

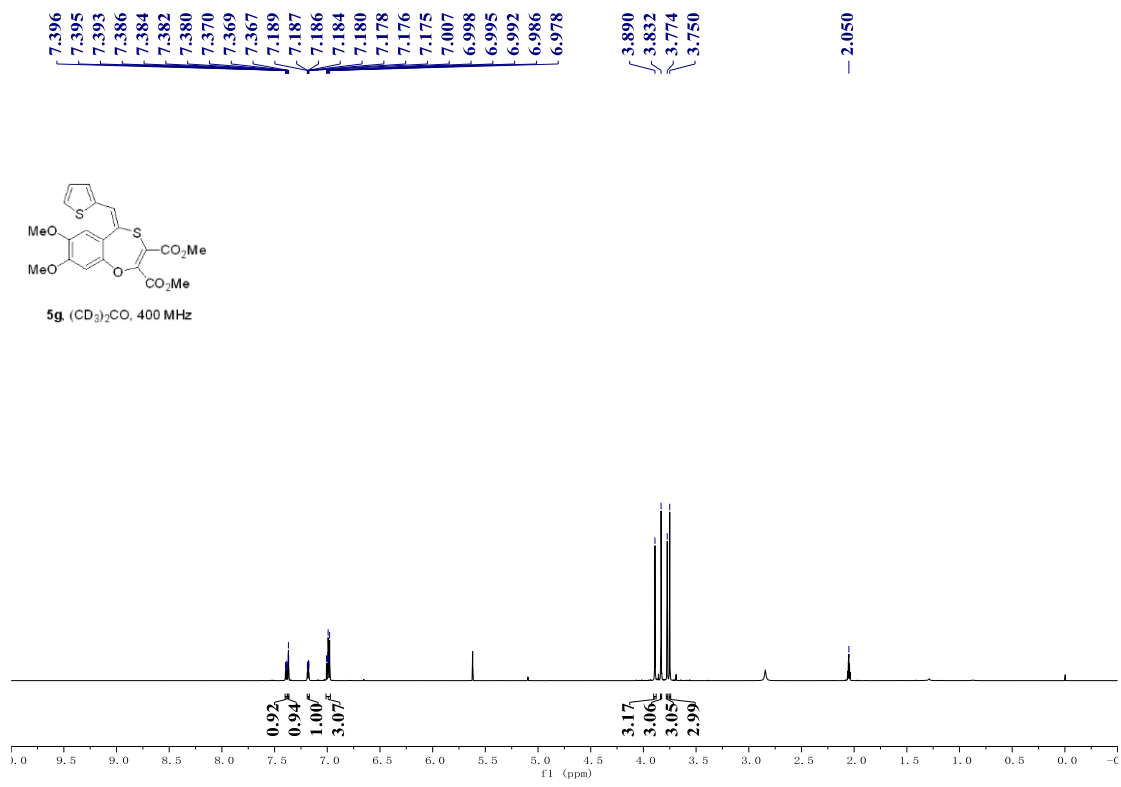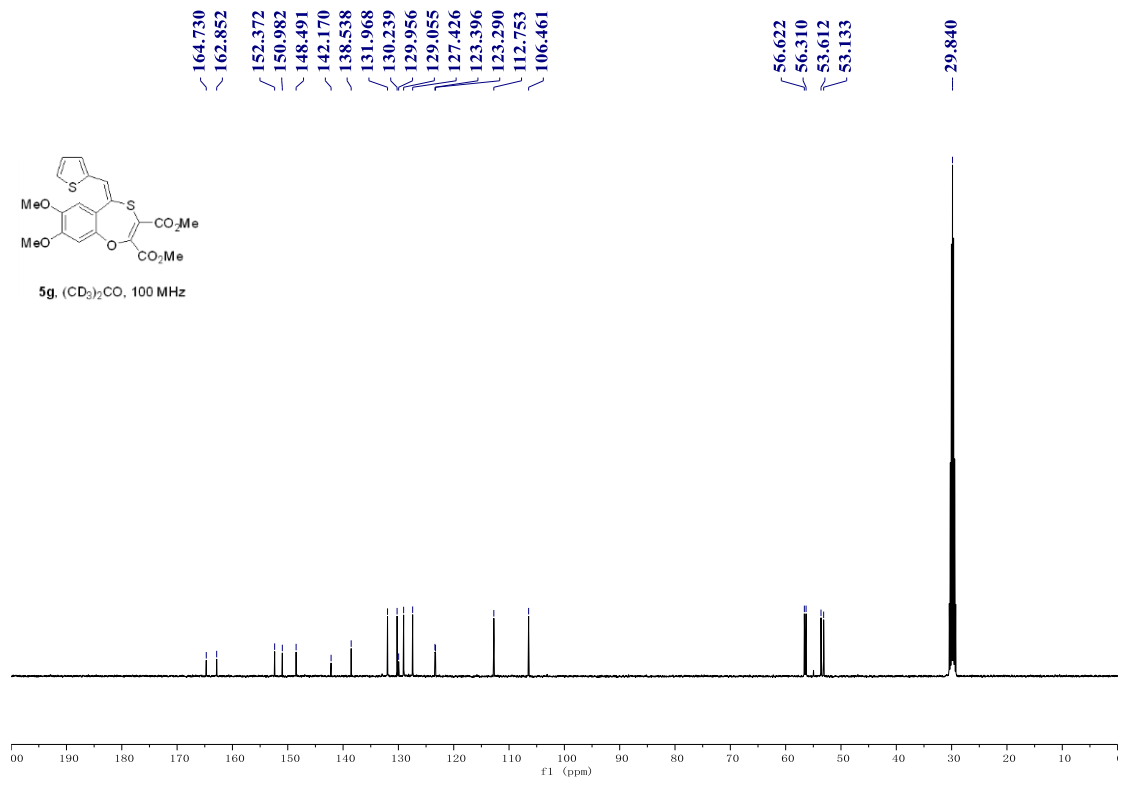

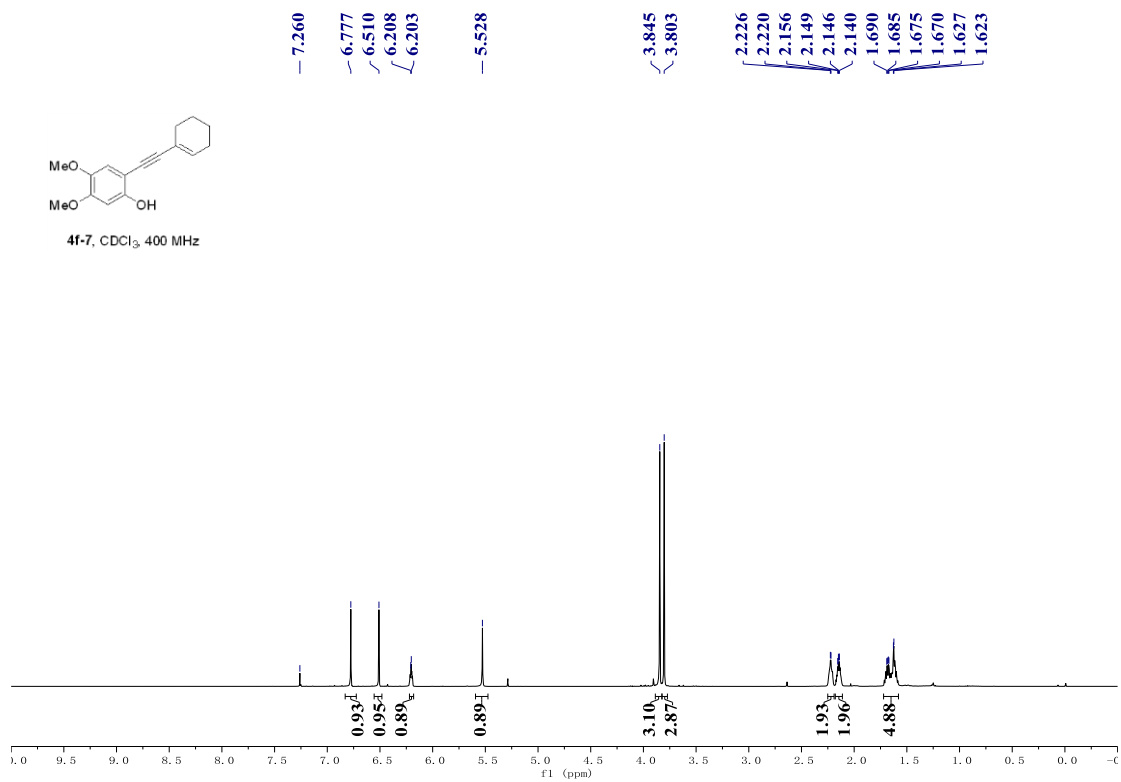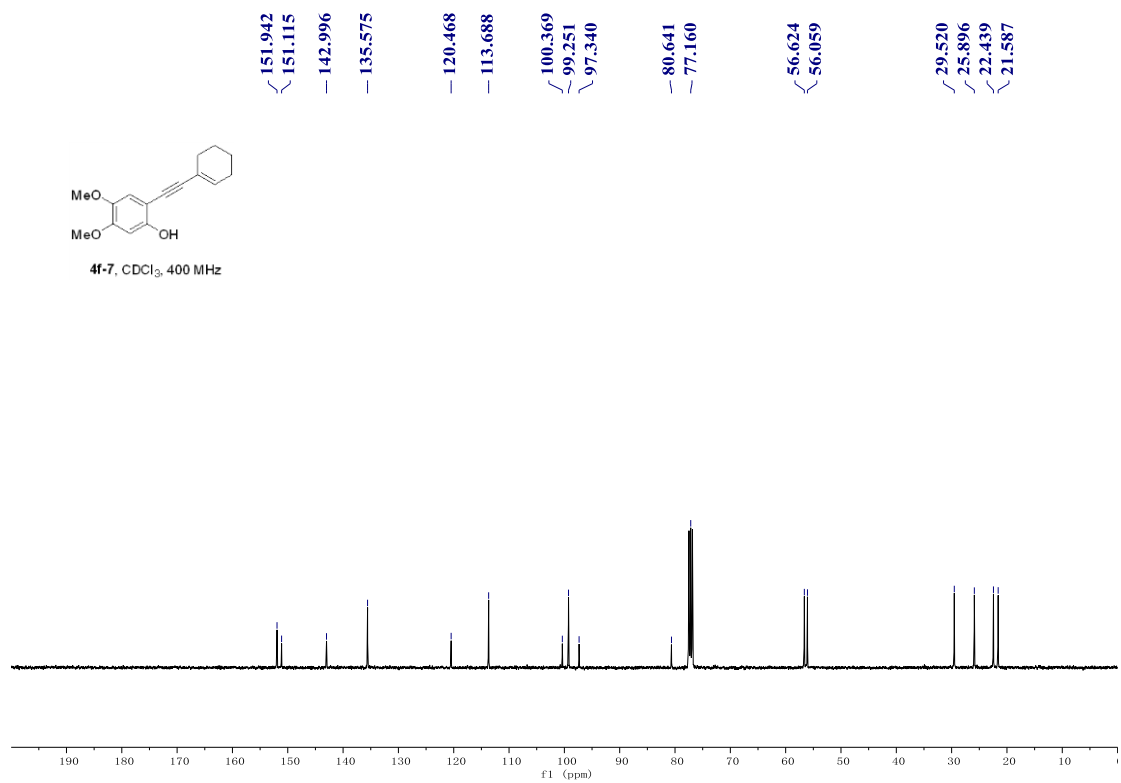

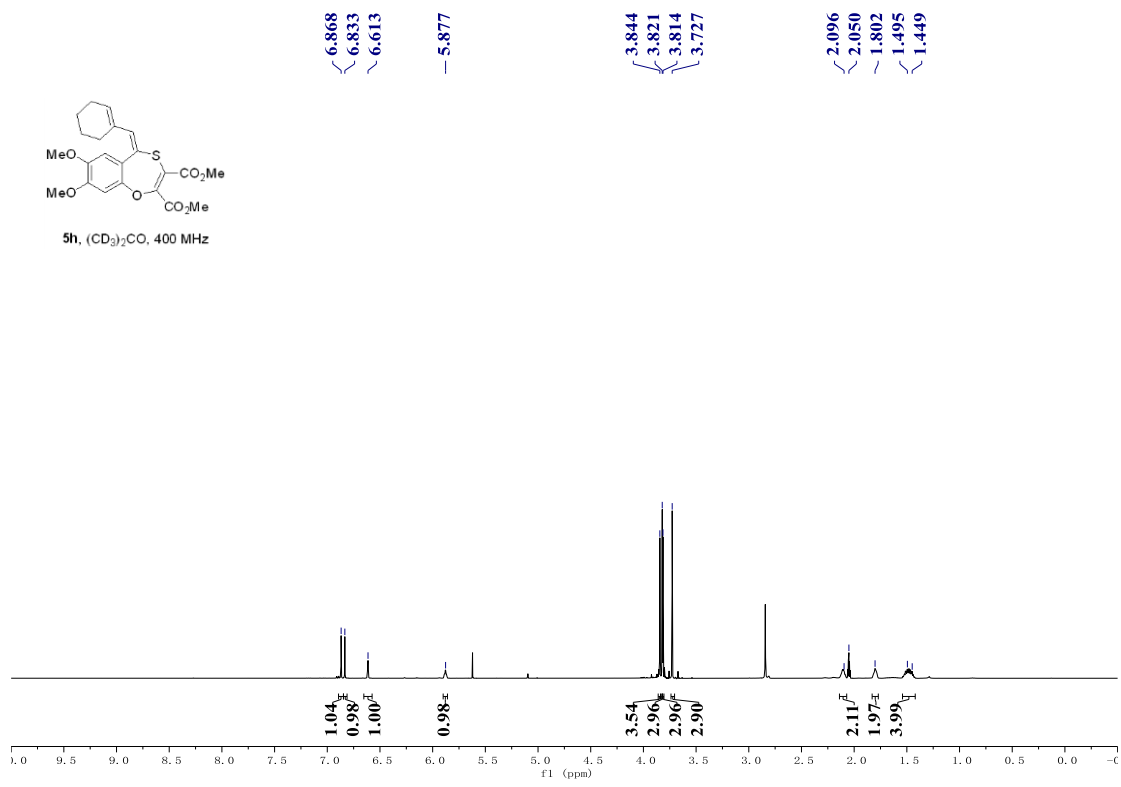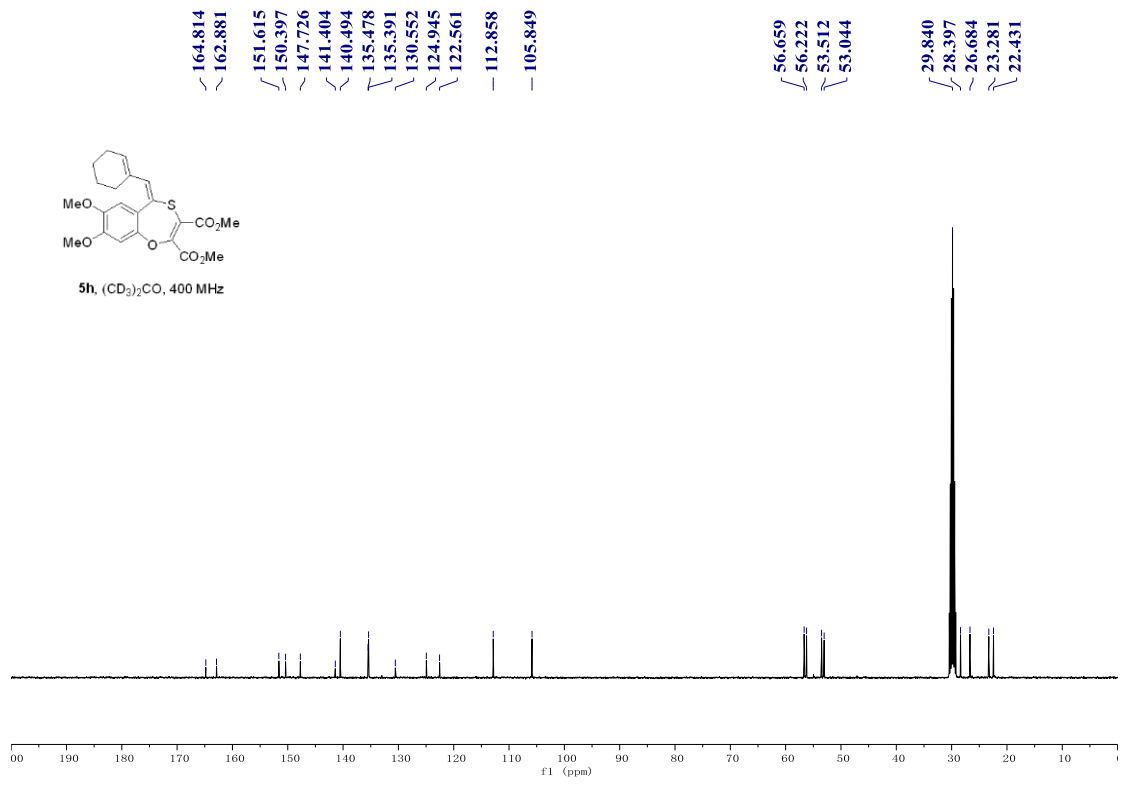



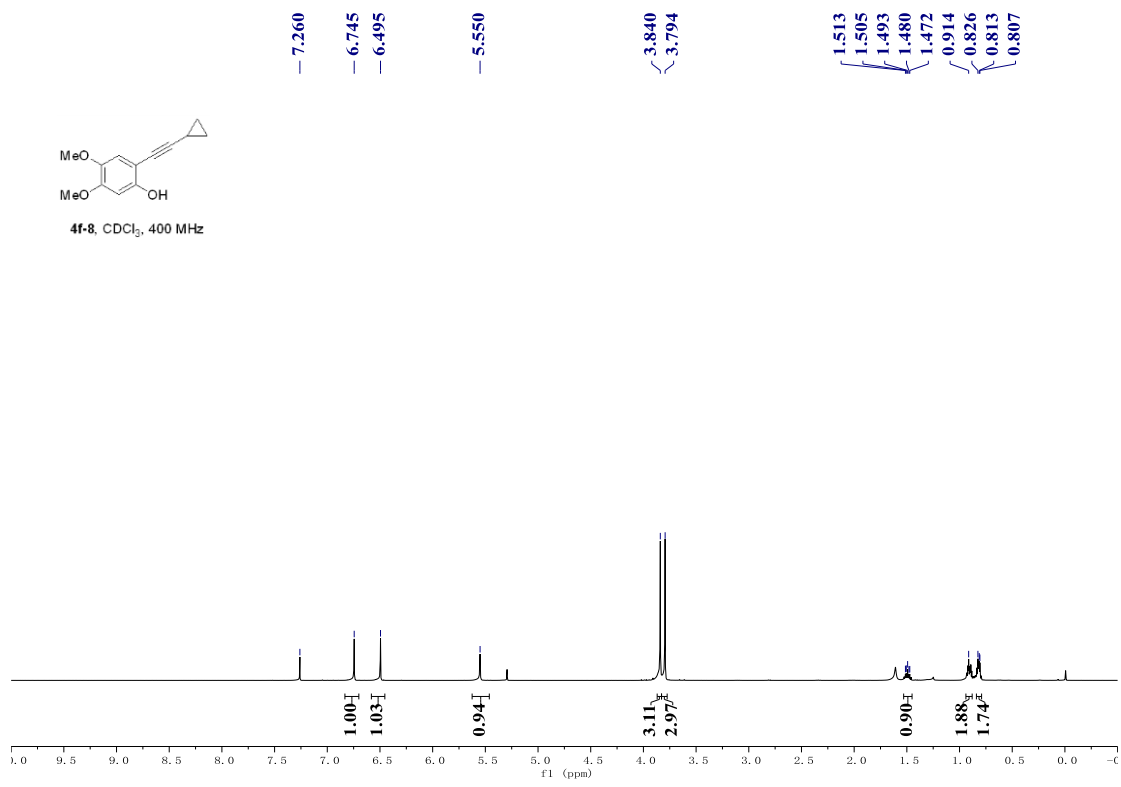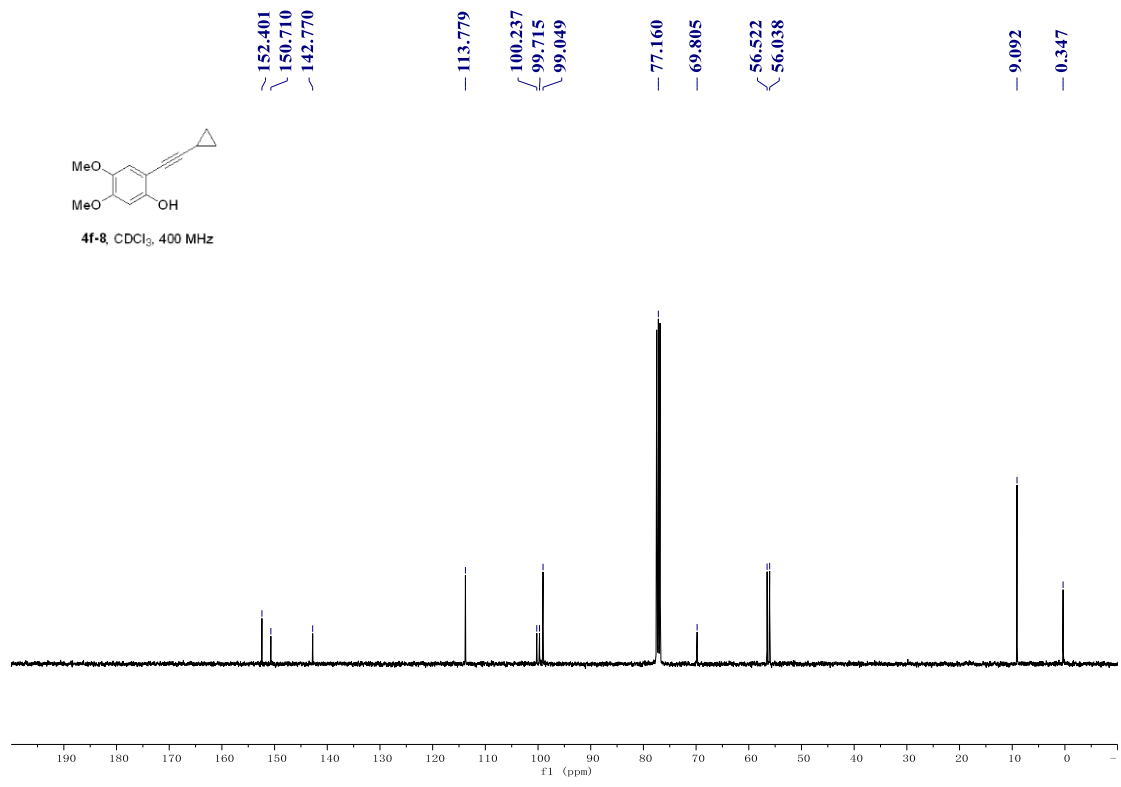

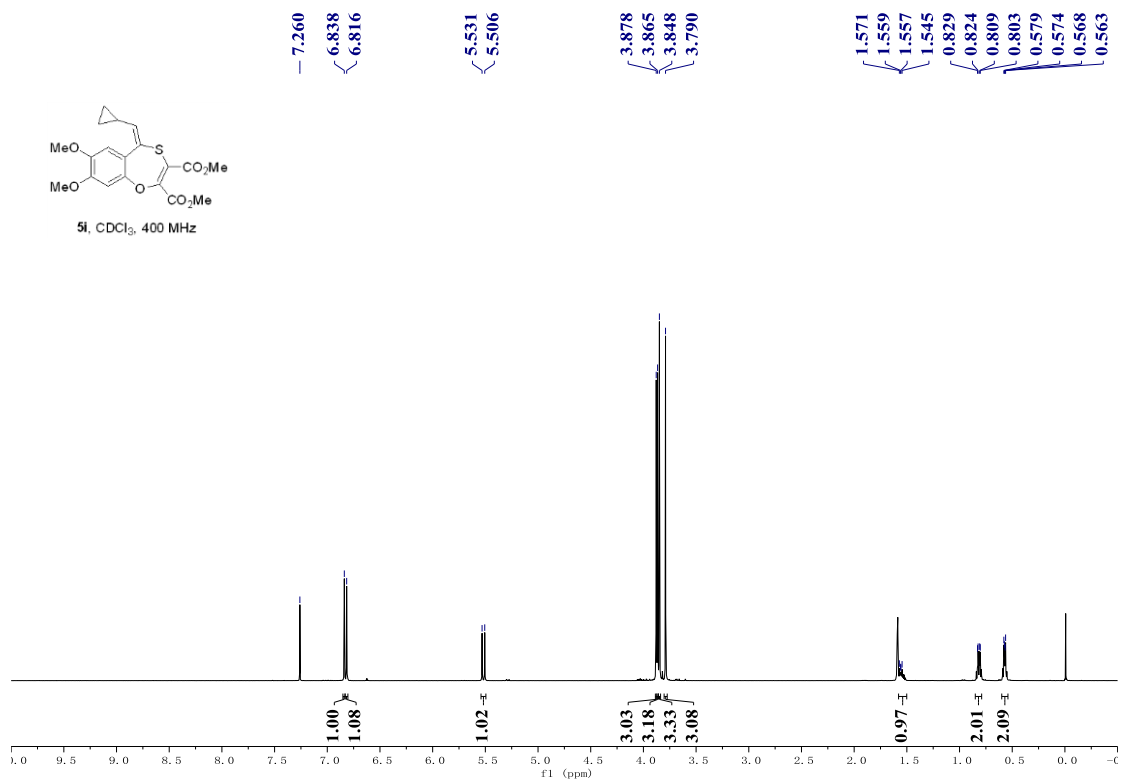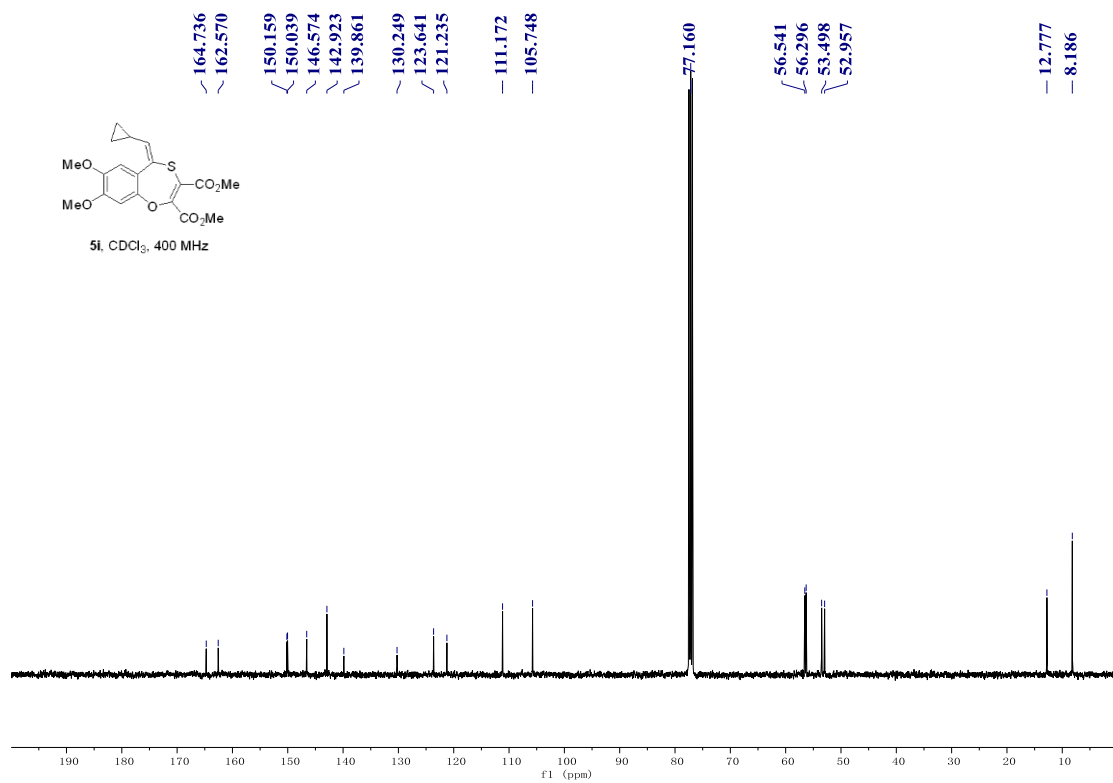

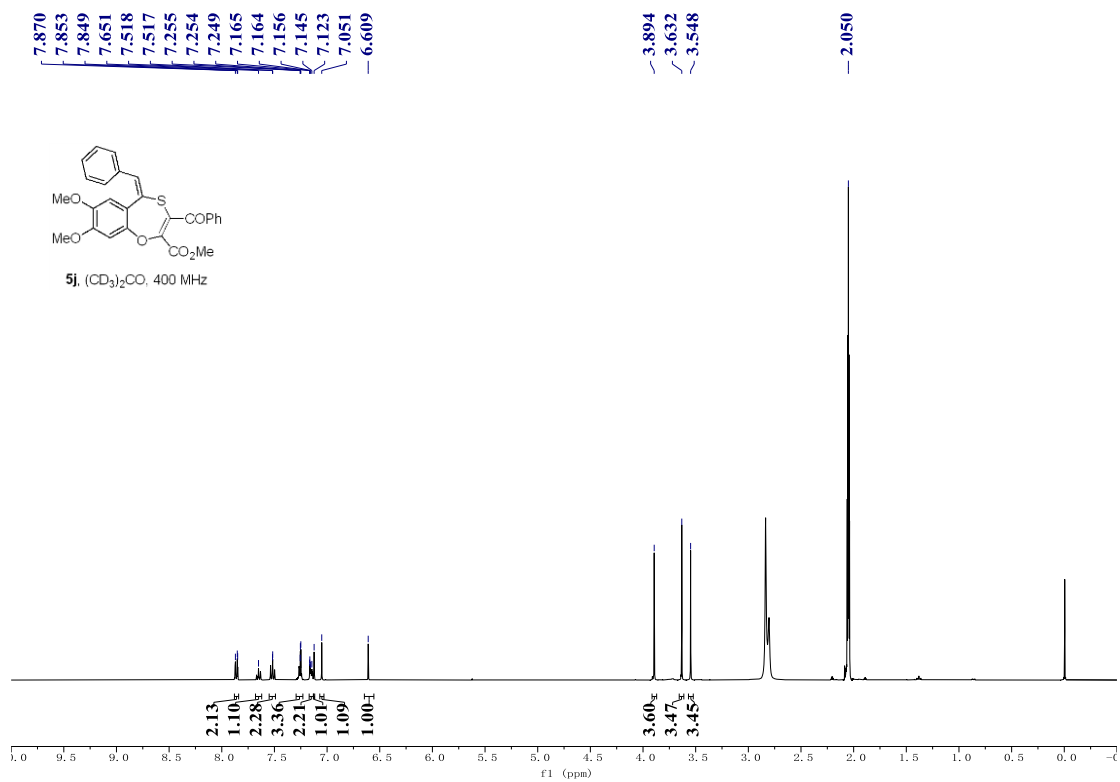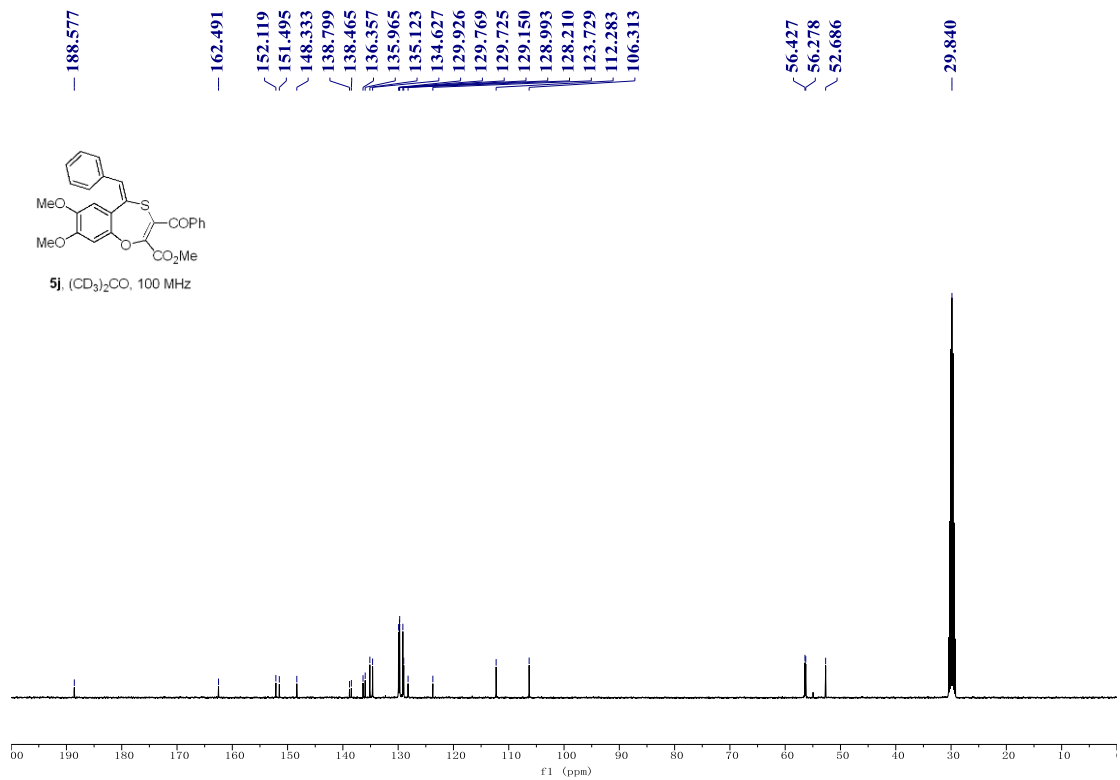

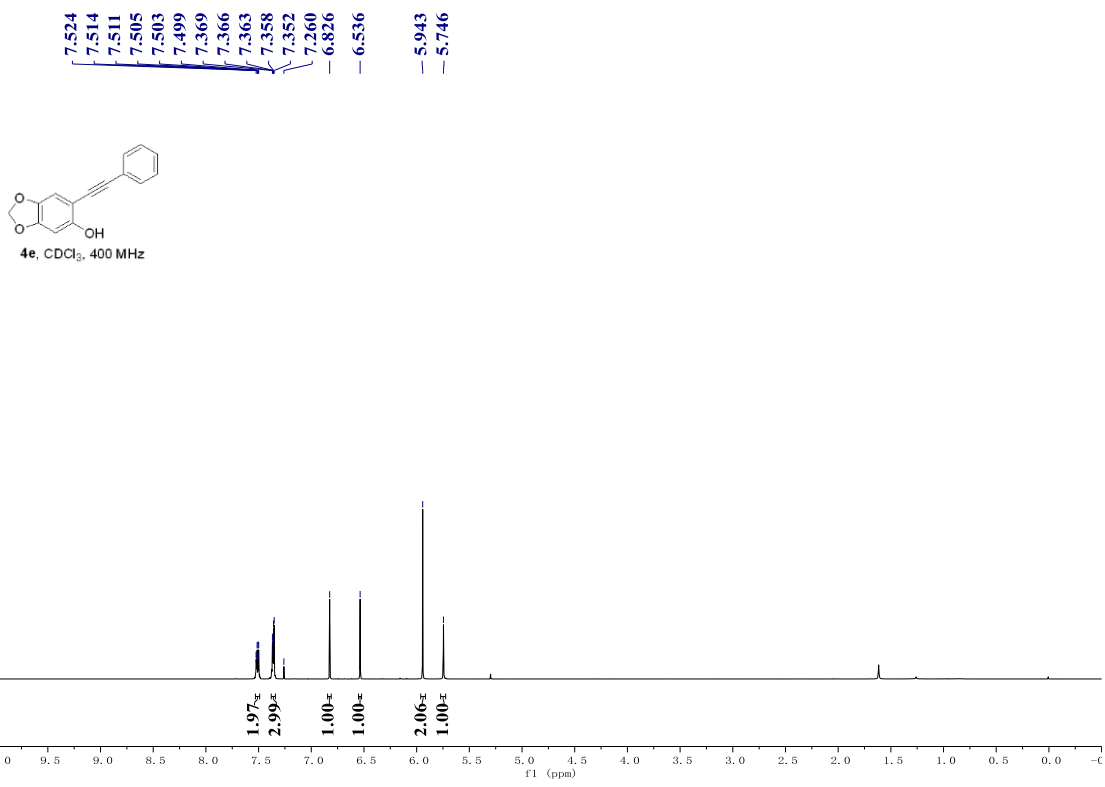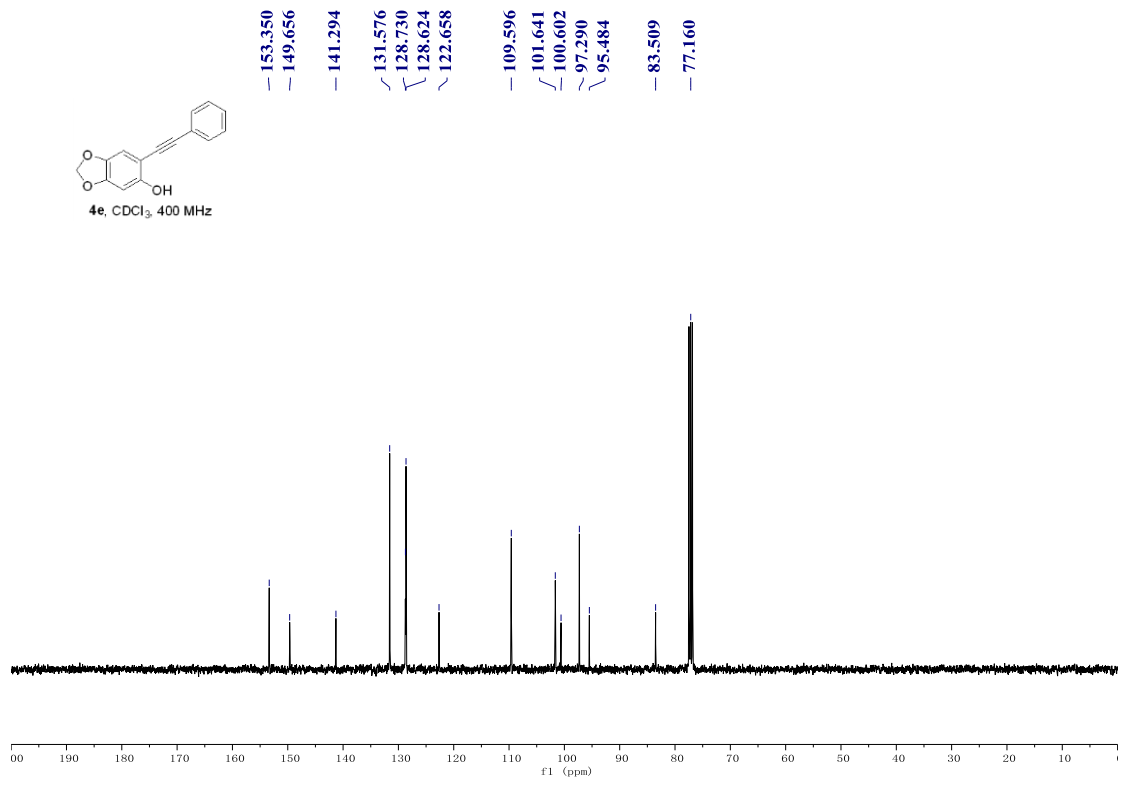

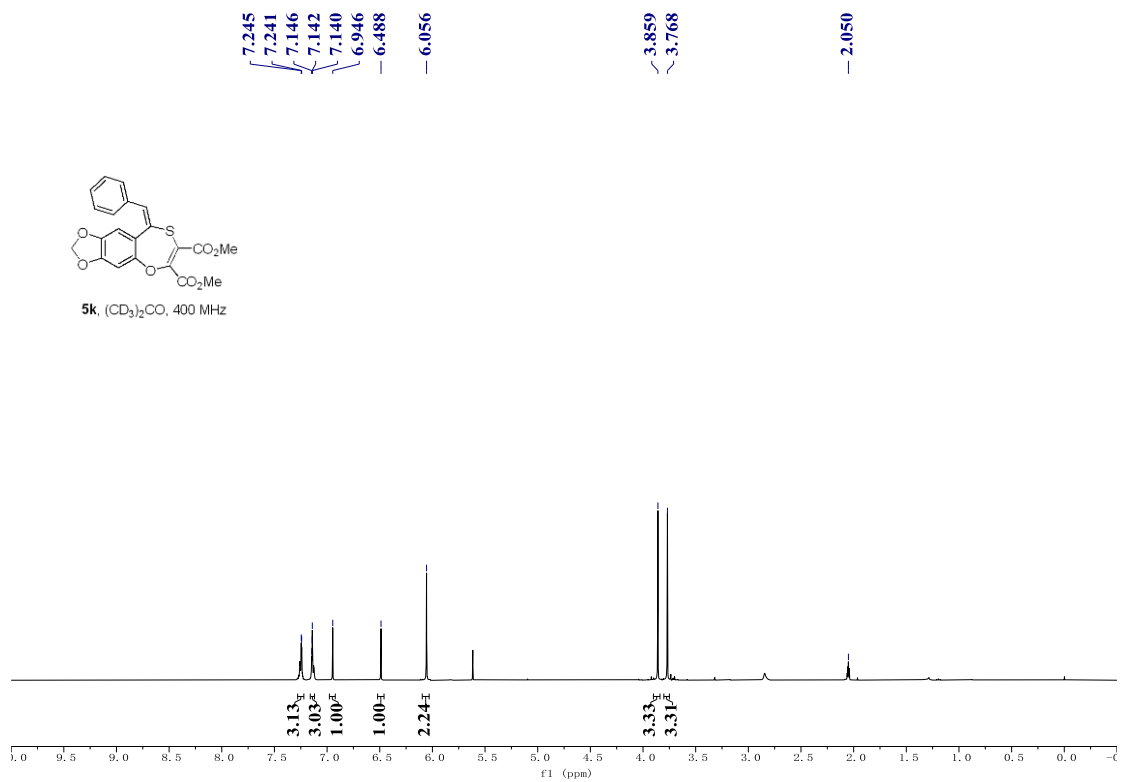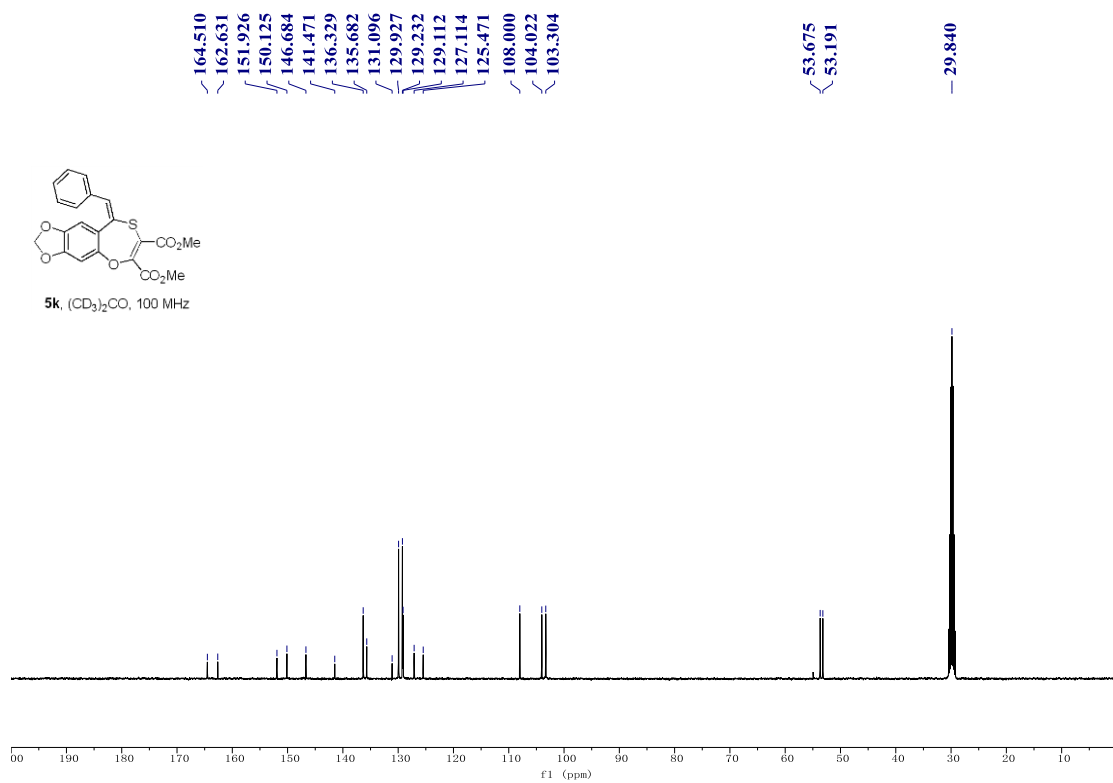

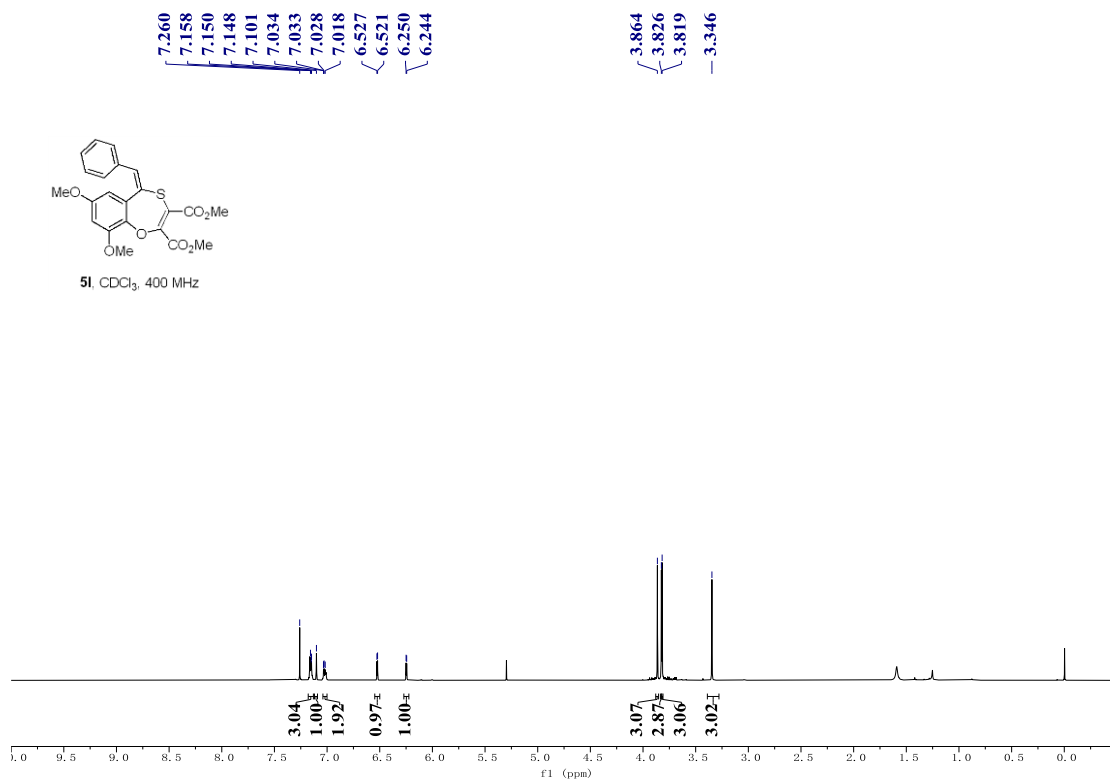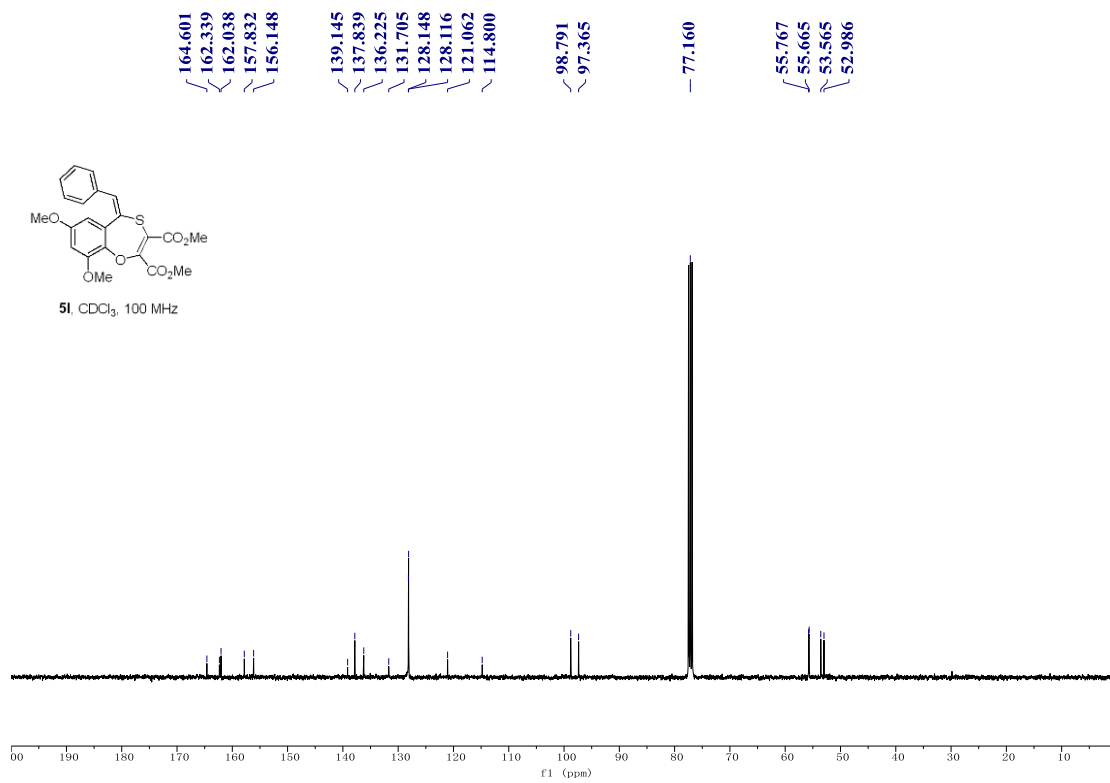

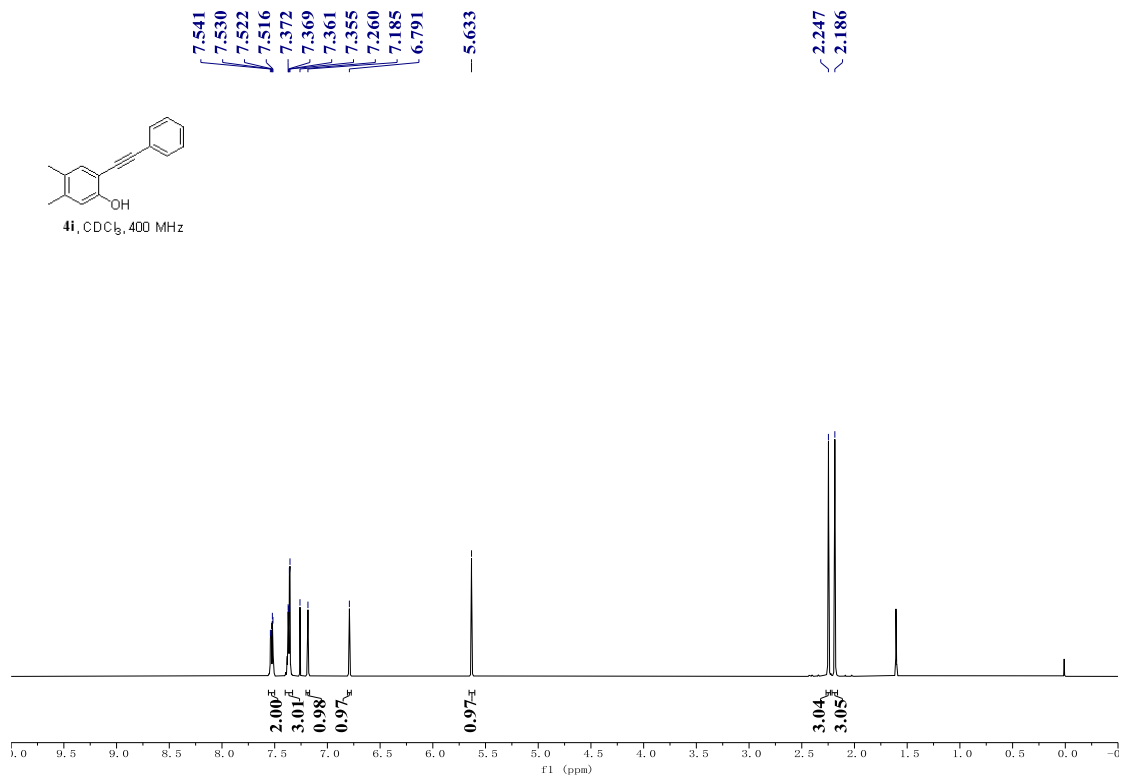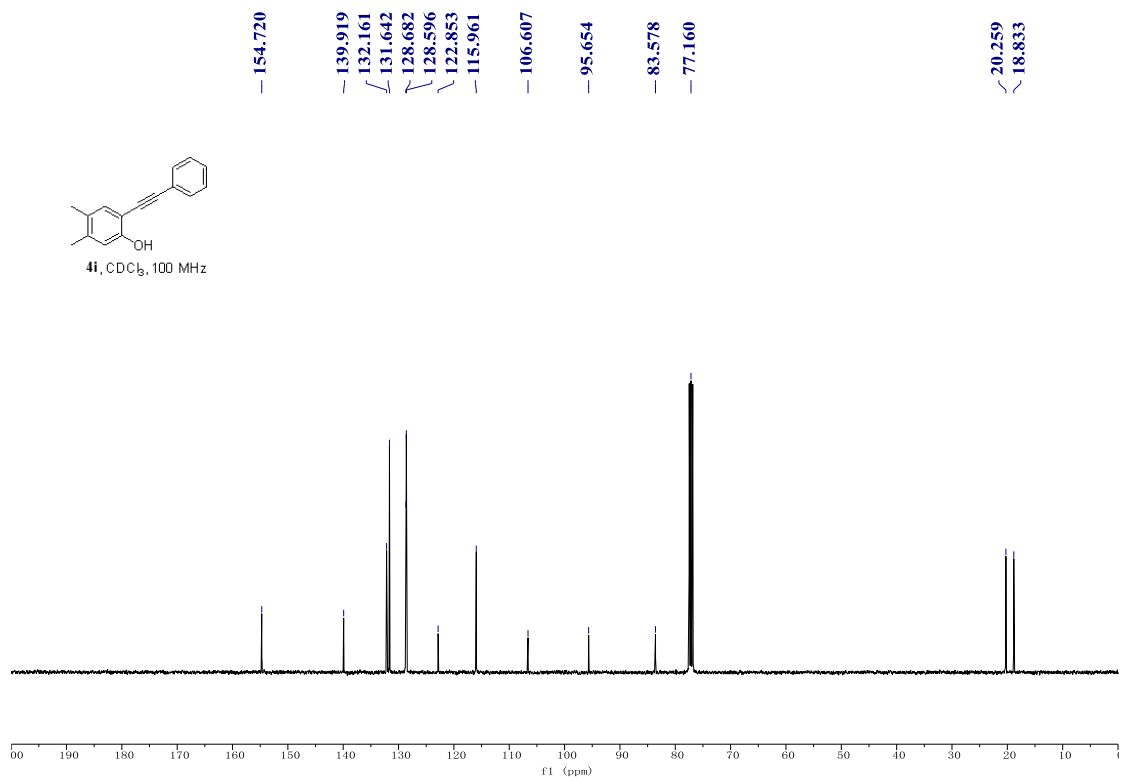

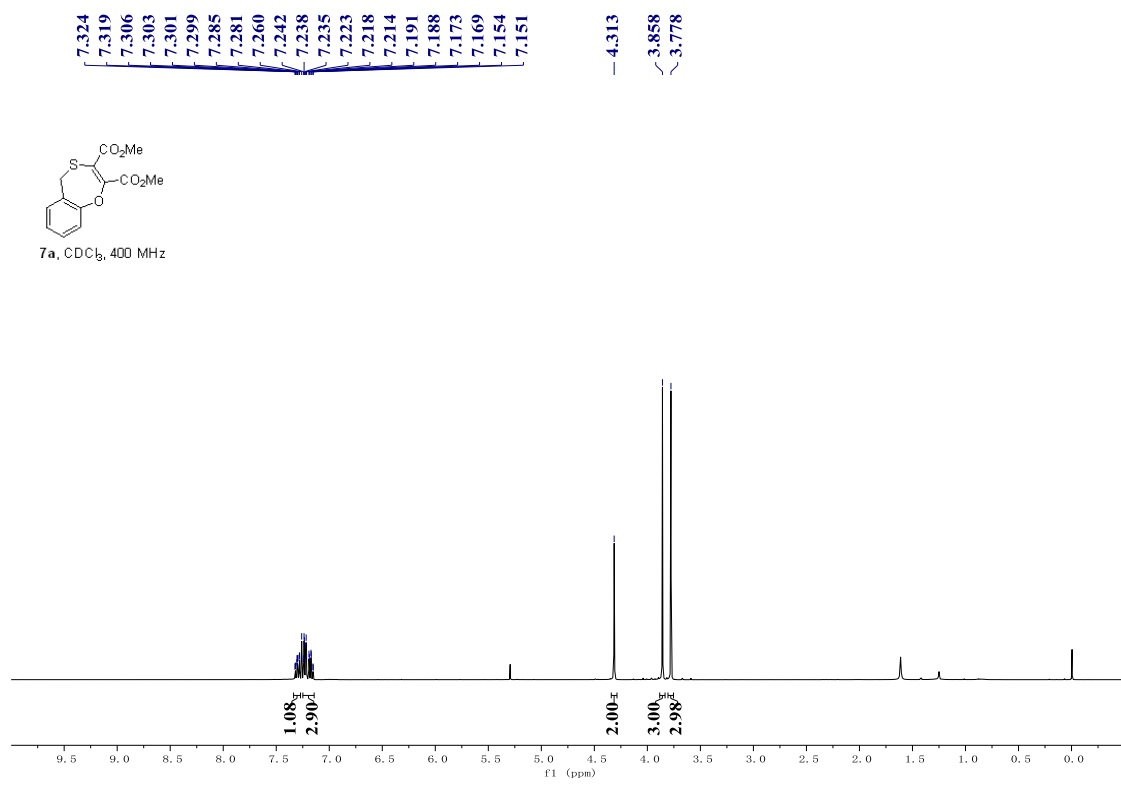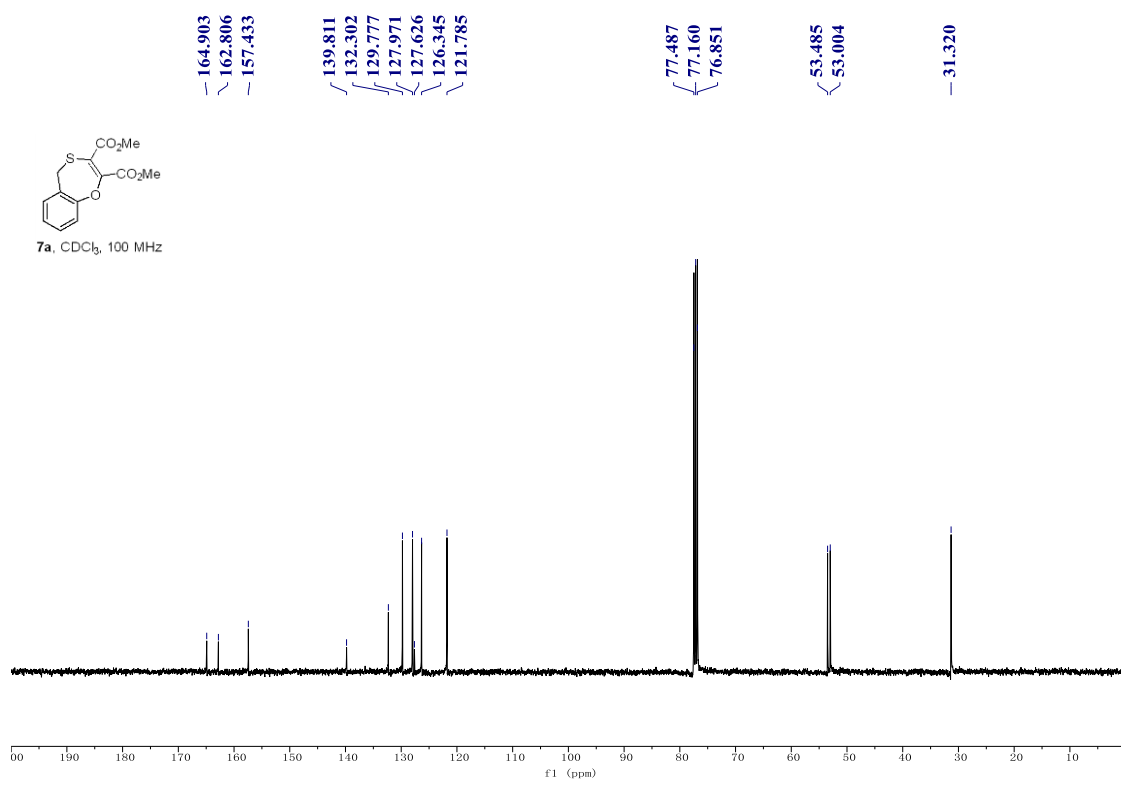



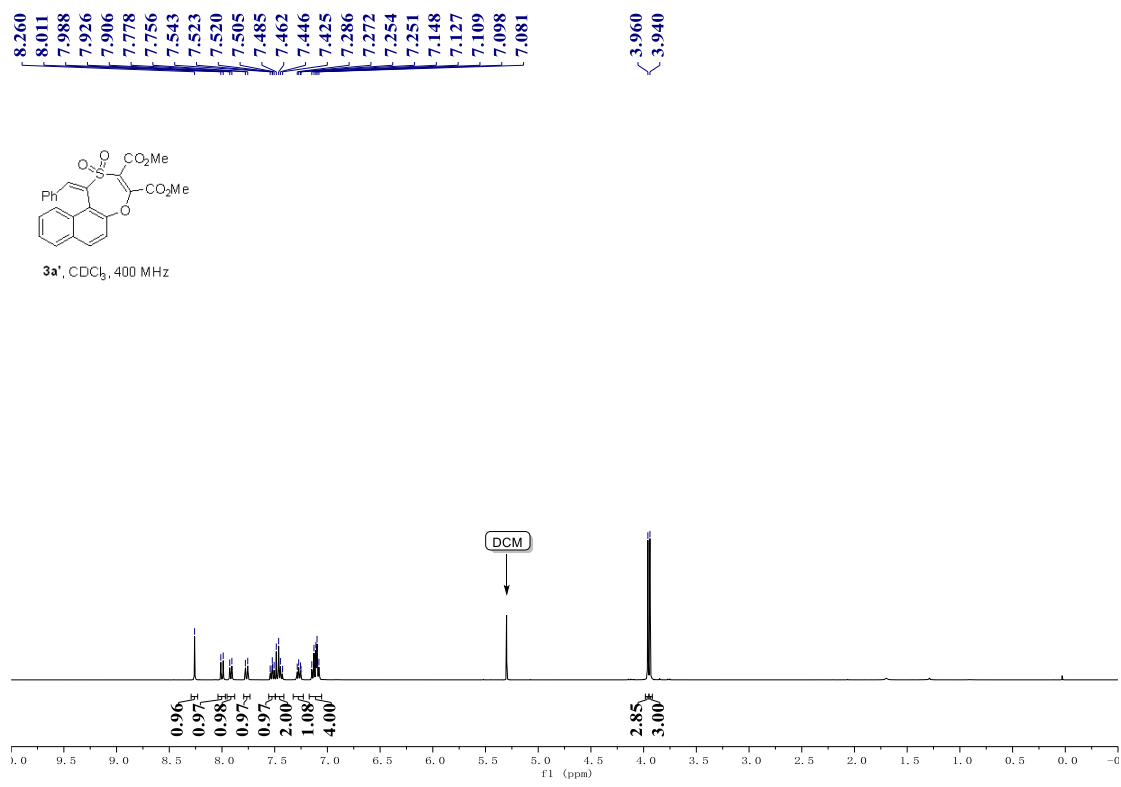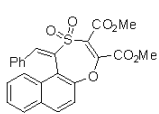

3a', CDCl<sub>3</sub>, 400 MHz

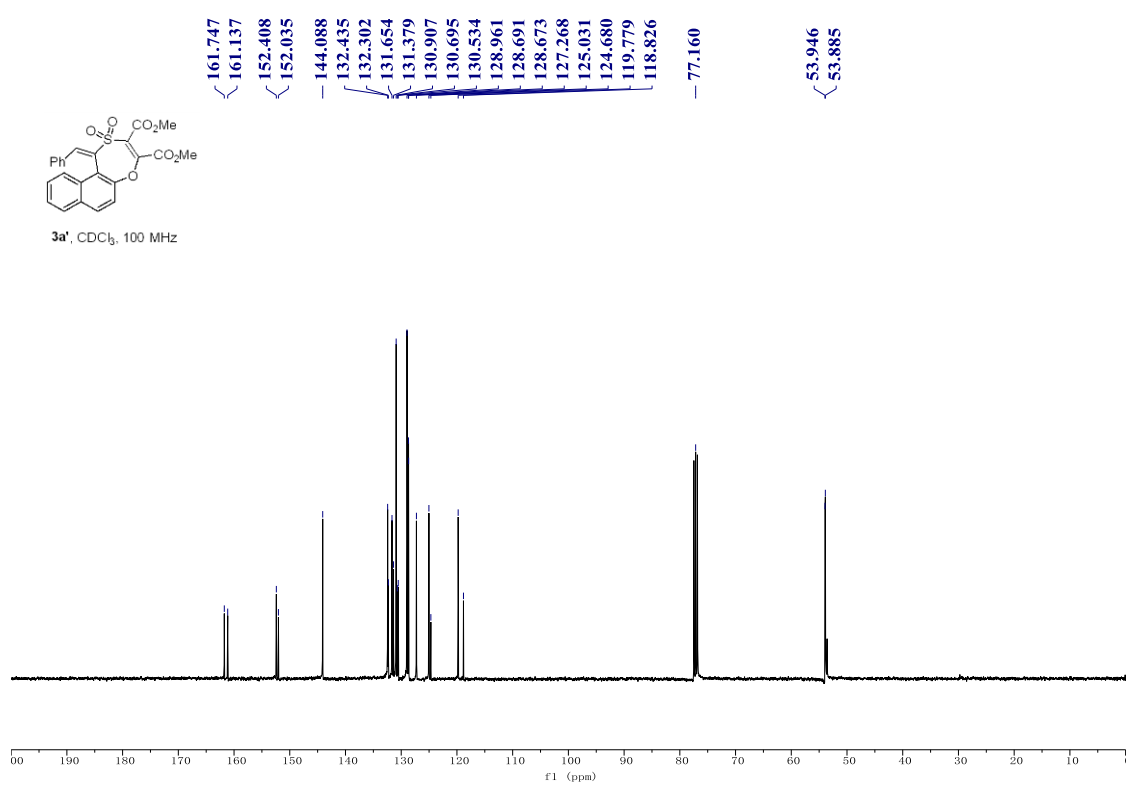

8.152  
8.147  
8.146  
8.131  
8.128  
7.780  
7.759  
7.718  
7.696  
7.630  
7.611  
7.606  
7.552  
7.529  
7.502  
7.463  
7.390  
7.367  
7.349  
7.286  
7.272  
7.260  
7.067  
7.049  
7.019  
7.003  
6.982  
6.979  
6.895  
6.891  
6.877  
6.872  
6.709  
6.687

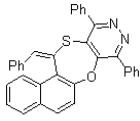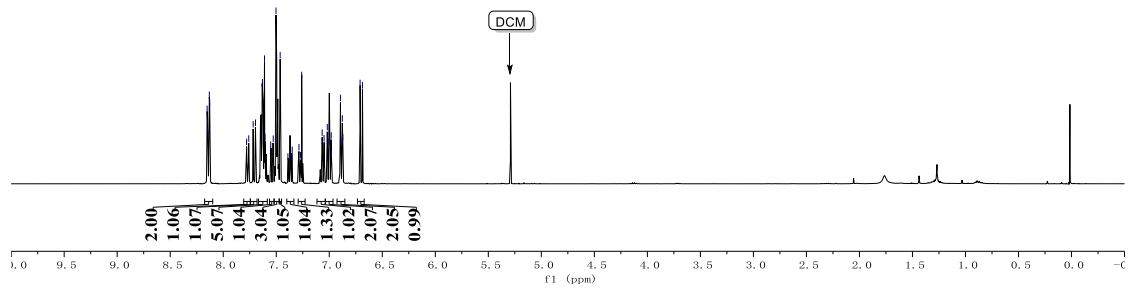

158.942  
154.103  
152.848  
149.628  
138.675  
135.572  
134.686  
134.497  
132.633  
132.036  
131.331  
130.567  
129.811  
129.675  
129.408  
128.921  
128.585  
128.575  
128.537  
128.514  
128.490  
128.428  
128.188  
127.642  
126.291  
124.903  
123.615  
120.456  
77.160

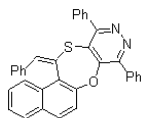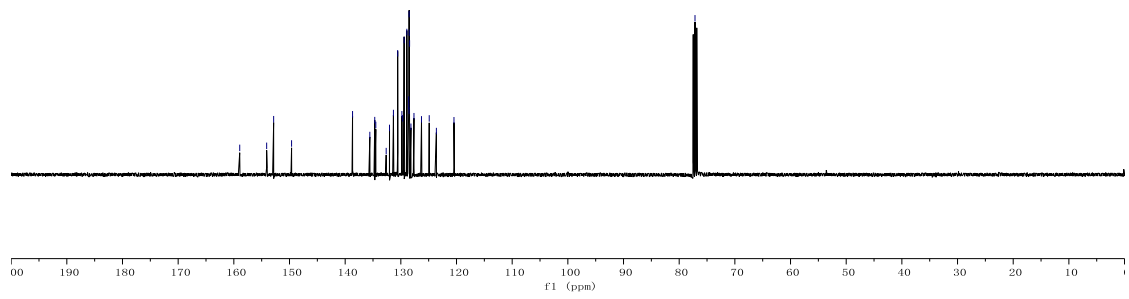

Supplement: d2qo00735e1.pdf [file d2qo00735e1.pdf]
